# Supplementary material for: Genomic Analysis of Sequence-Dependent DNA Curvature in Leishmania
Source: PubMed Central journal article supplement (PMC3639952; doi:10.1371/journal.pone.0063068), 2013-04-30

## **S Figure 5. Graphical representation of IC peaks on all *L. major* chromosomes**

Bar plots of IC positions with an IC value greater than 9 degrees per helical turn. Both DNA strands are depicted in grey below bar plots, overlaid with CDS features shown in blue. Features labeled as ncRNA, snRNA or snoRNAs are shown in green. tRNAs are shown in red. rRNAs are shown in brown.

# Chromosome 1

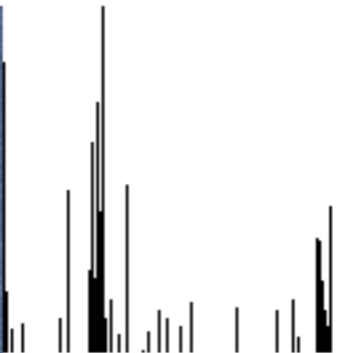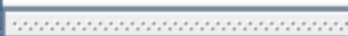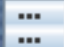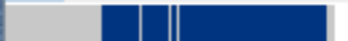

175000

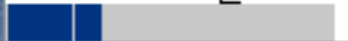

# Chromosome 2

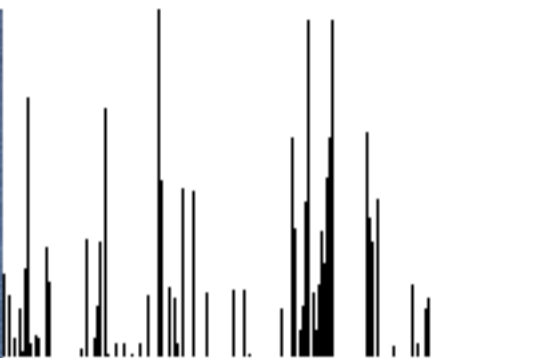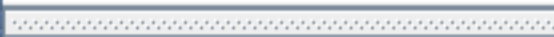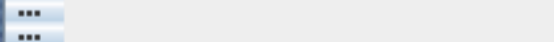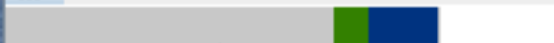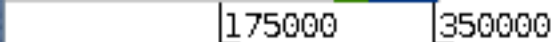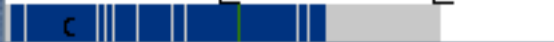

# Chromosome 3

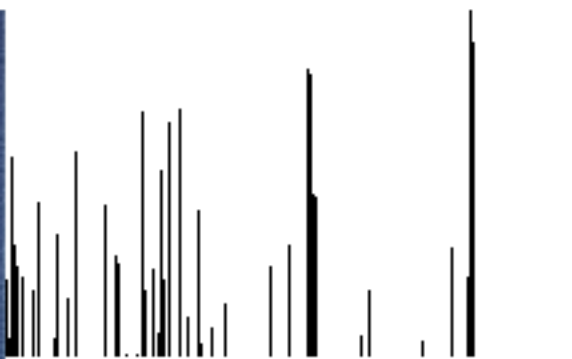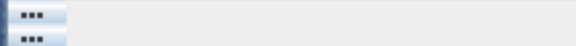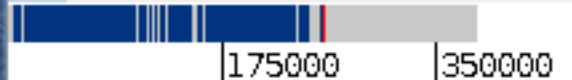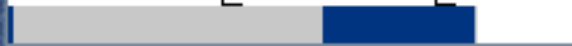

# Chromosome 4

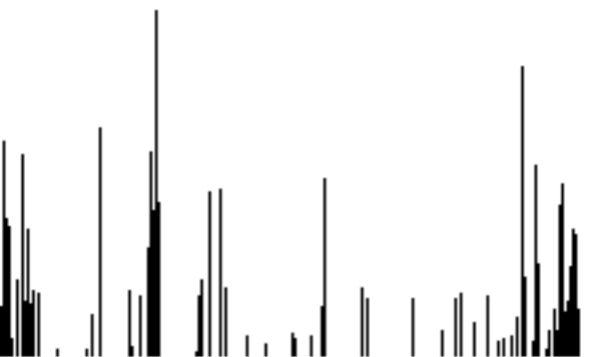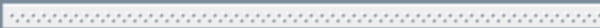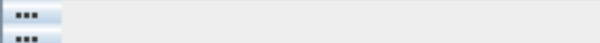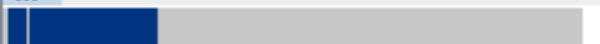

175000

350000

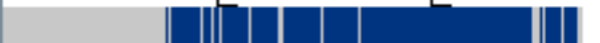

# Chromosome 5

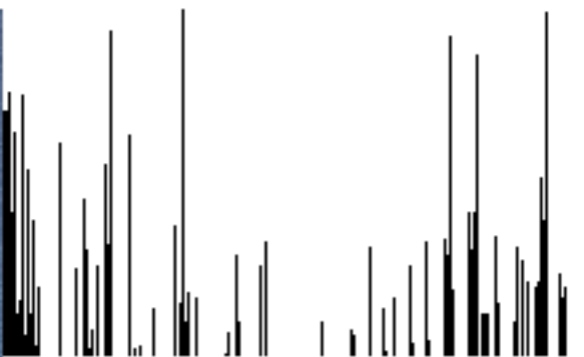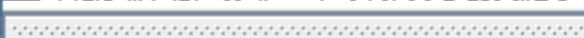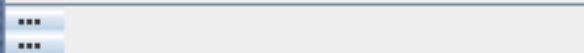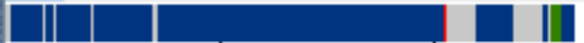

175000

350000

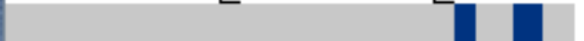

# Chromosome 6

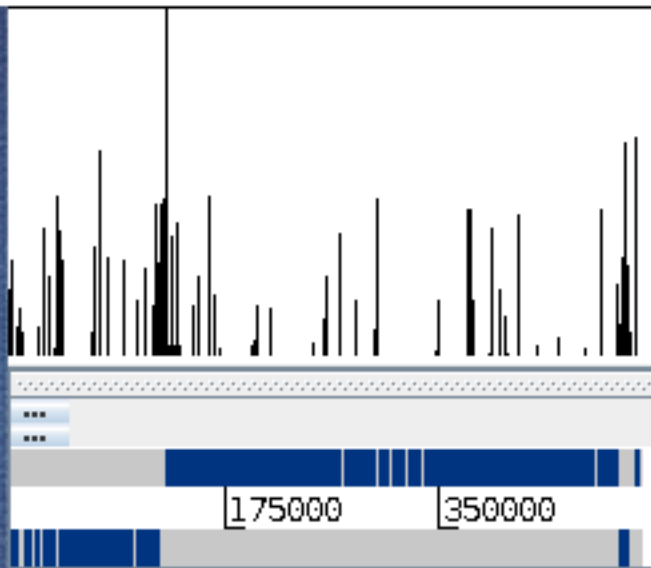

*Chromosome 7*

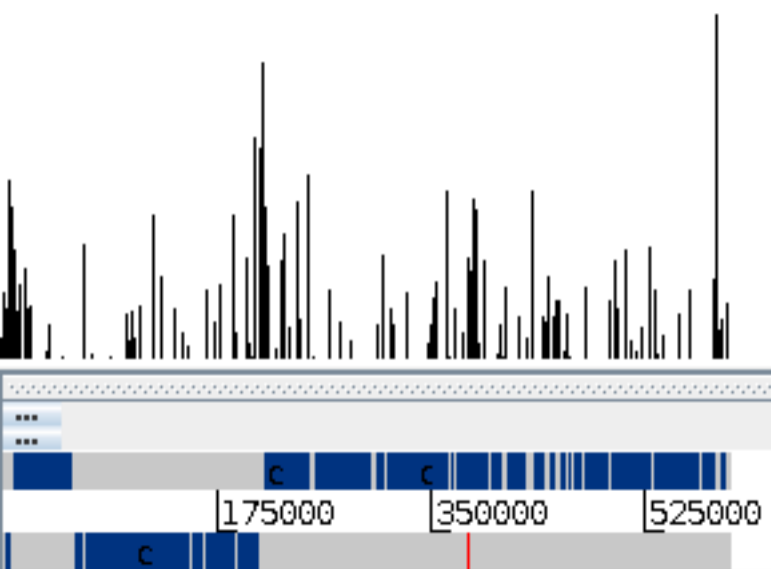



Chromosome 8

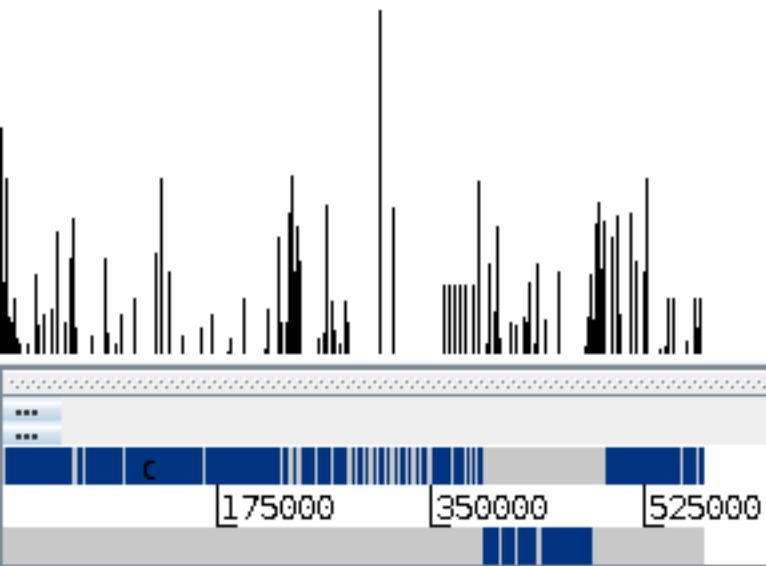

Chromosome 9

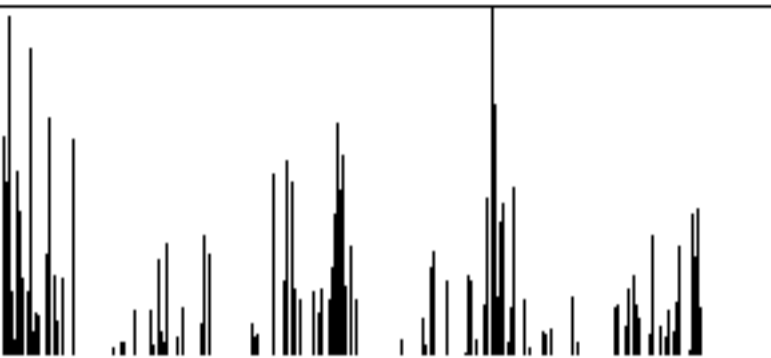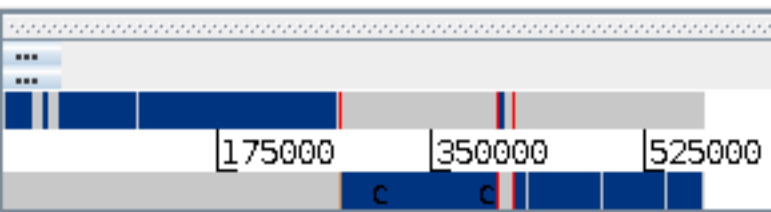

Chromosome 10

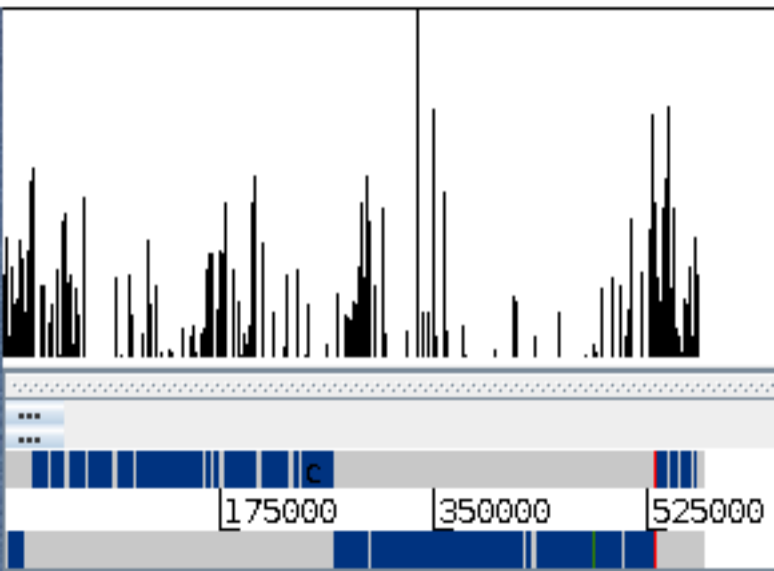

# Chromosome 11

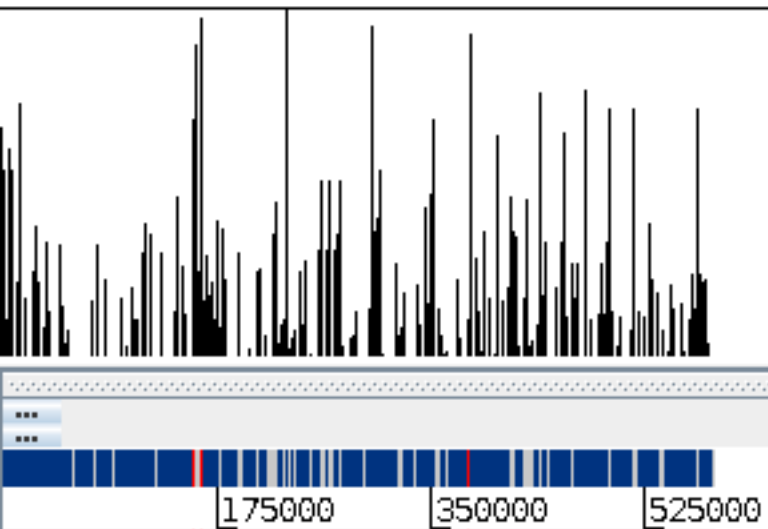

175000

350000

525000

Chromosome 12

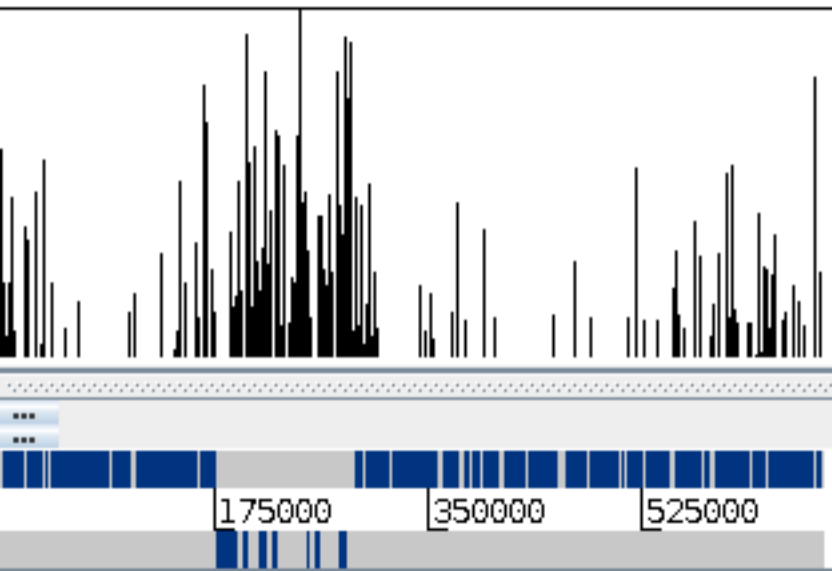

Chromosome 13

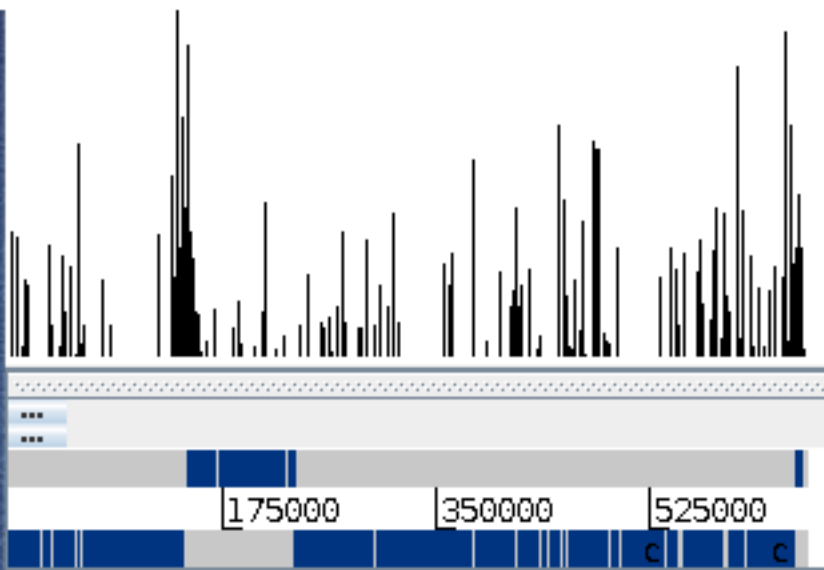

Chromosome 14

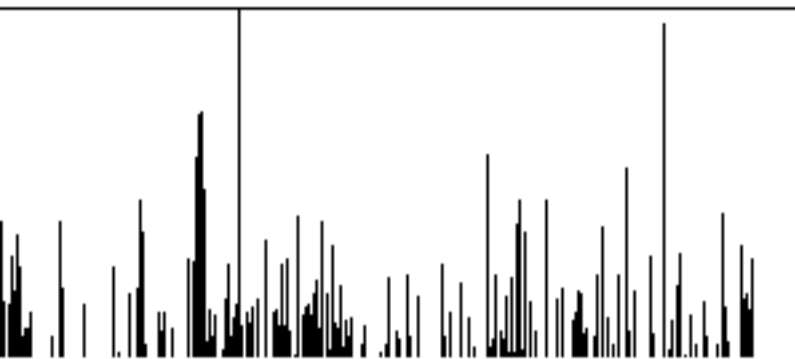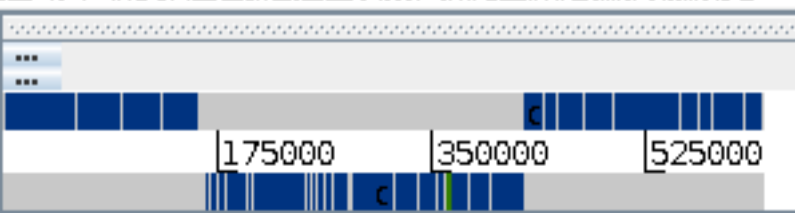

# Chromosome 15

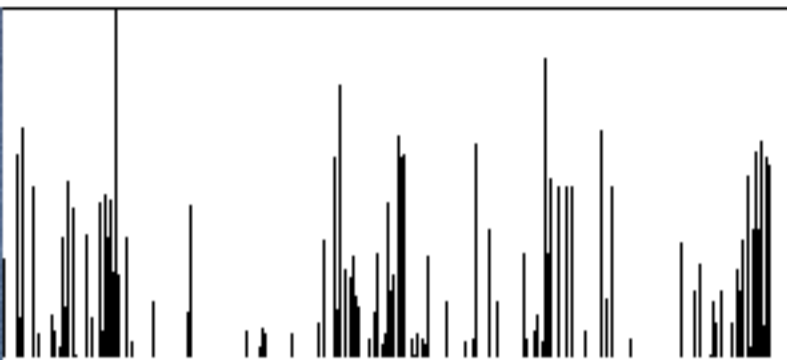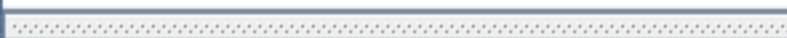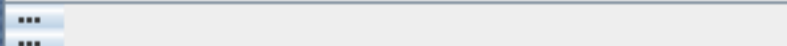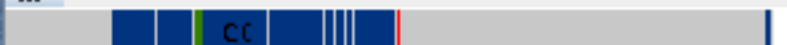

175000

350000

525000

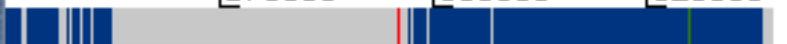



Chromosome 16

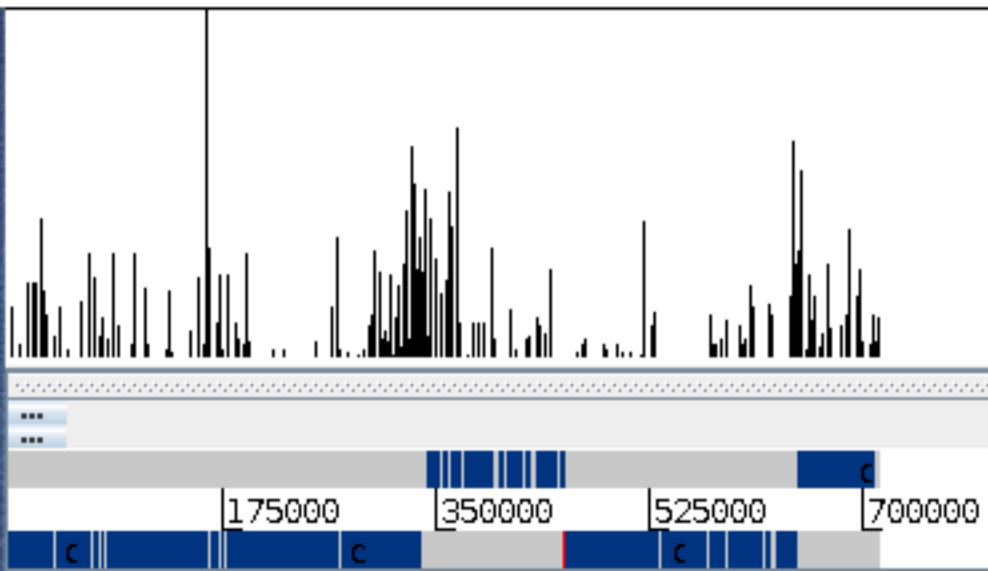

Chromosome 17

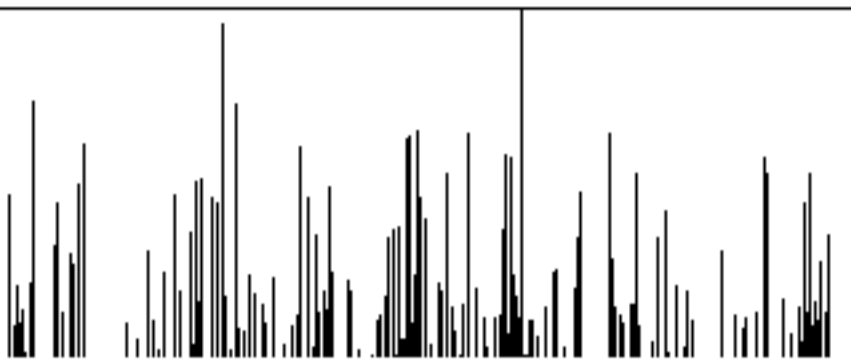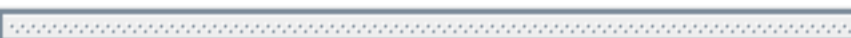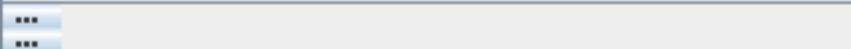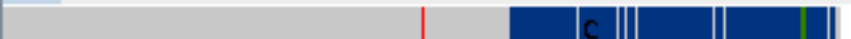

175000

350000

525000

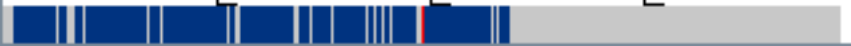

Chromosome 18

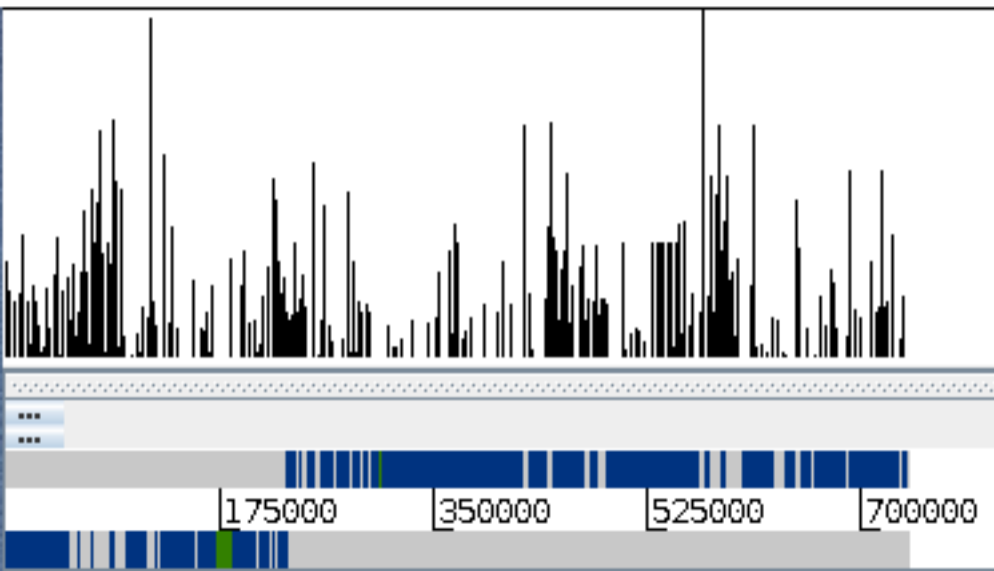

Chromosome 19

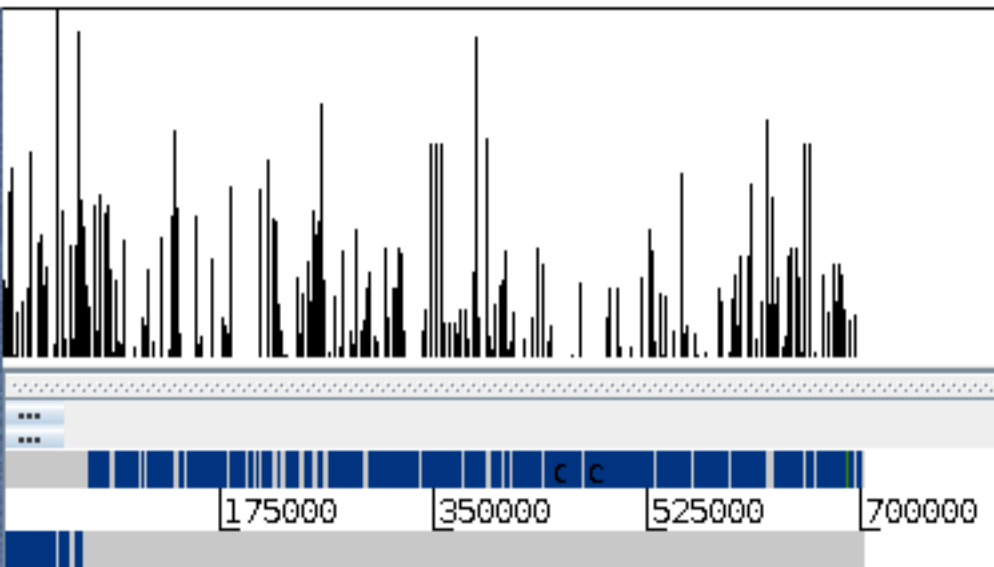

Chromosome 20

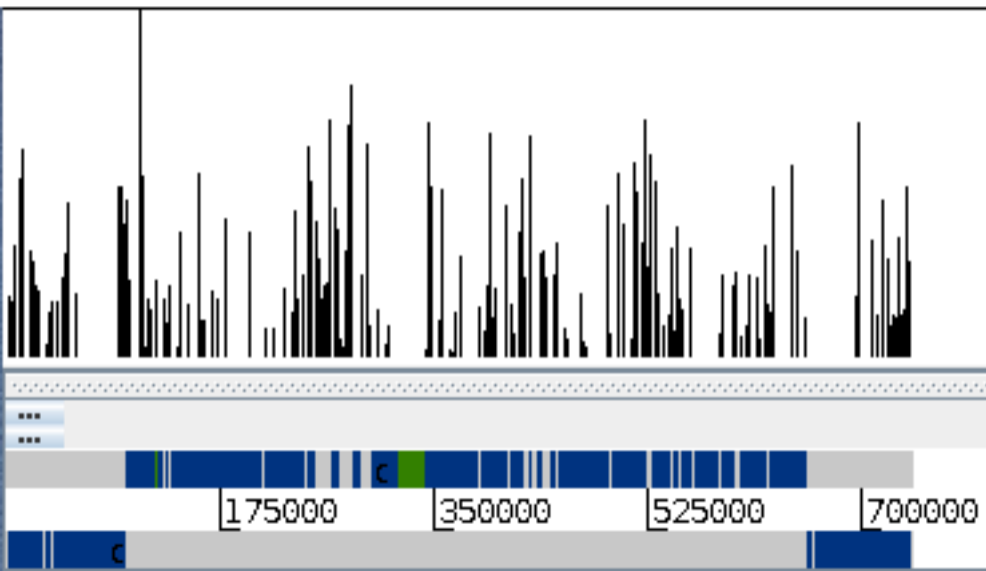

Chromosome 21

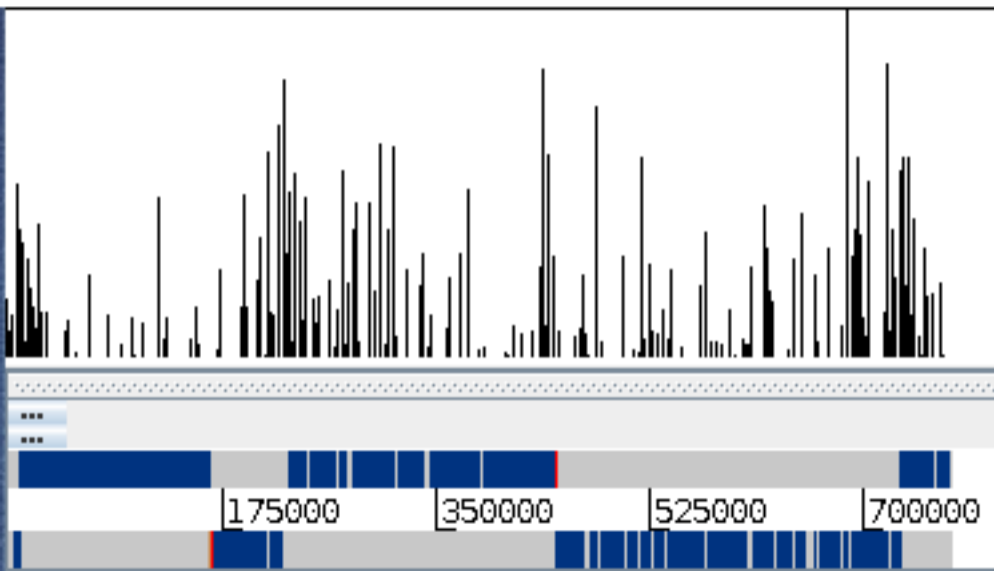

Chromosome 22

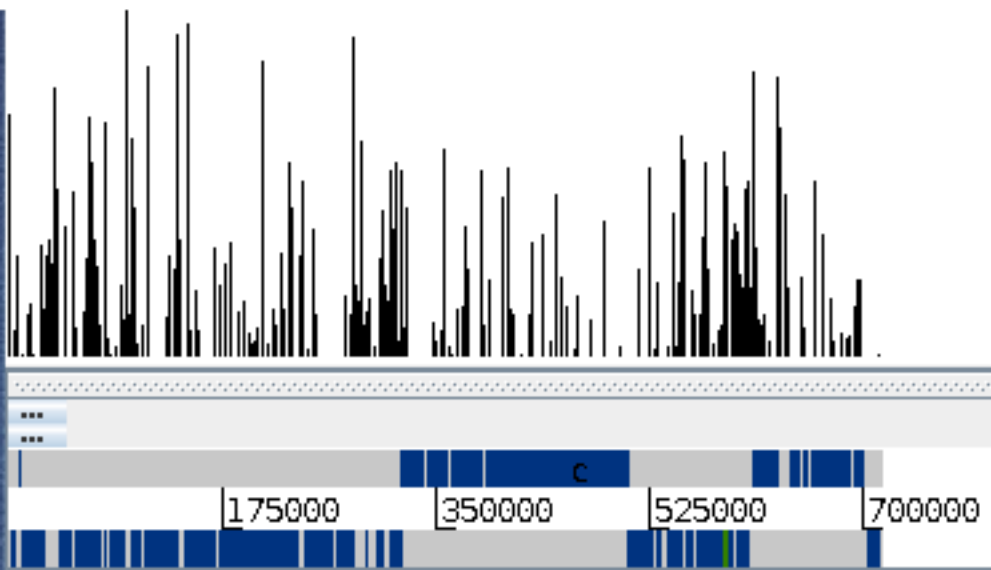

Chromosome 23

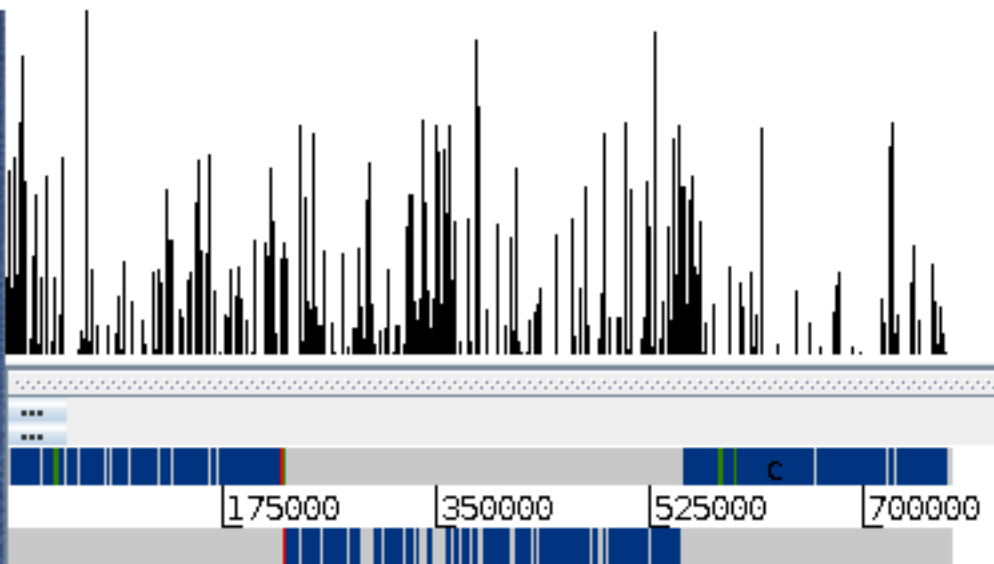



Chromosome 24

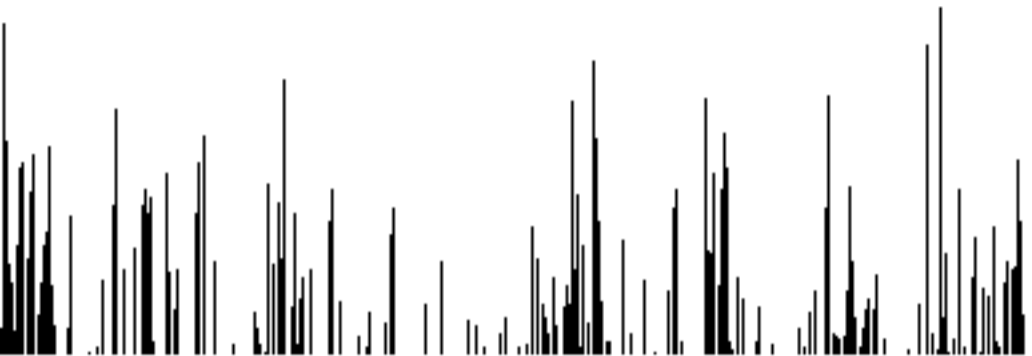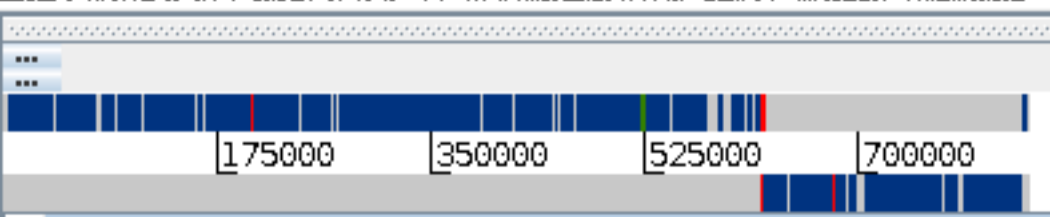

Chromosome 25

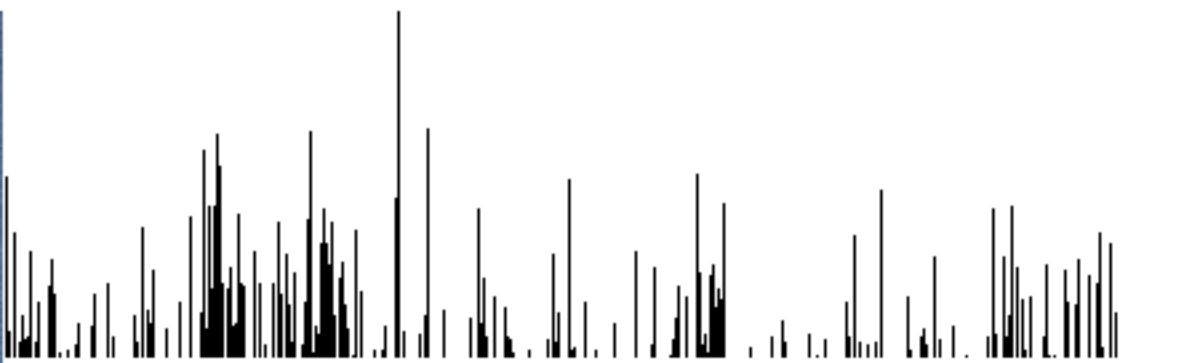

\*\*\*  
\*\*\*

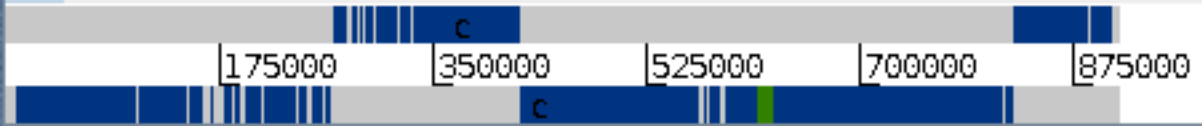

Chromosome 26

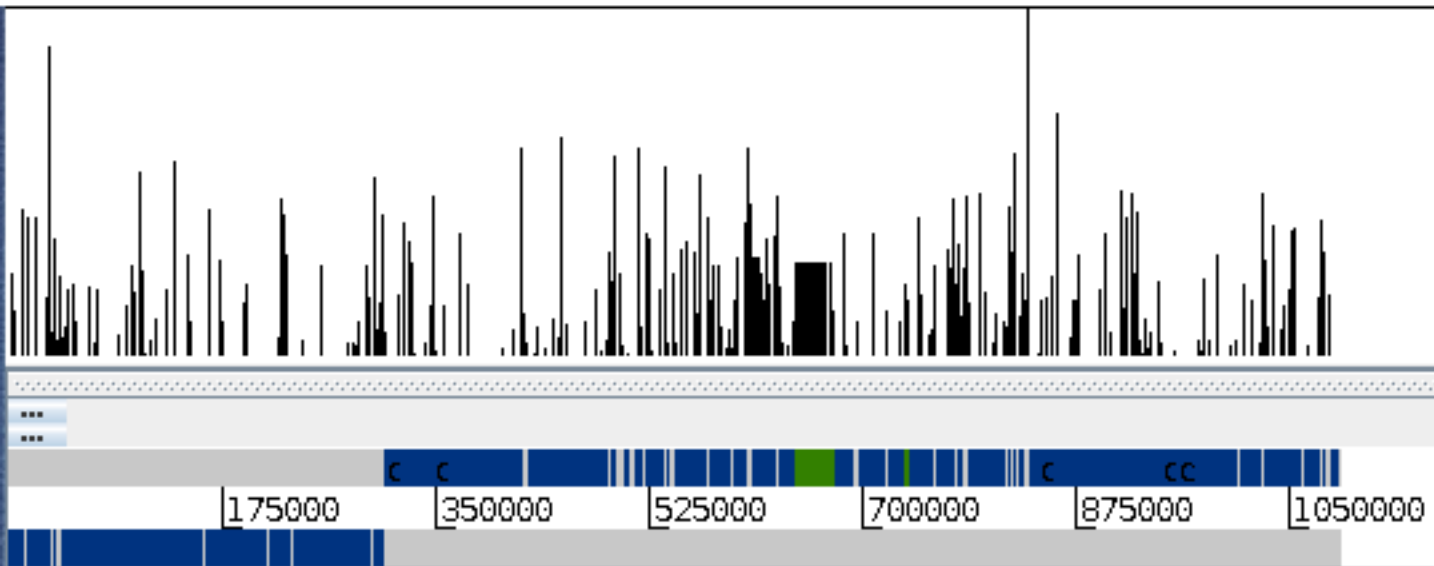

Chromosome 27

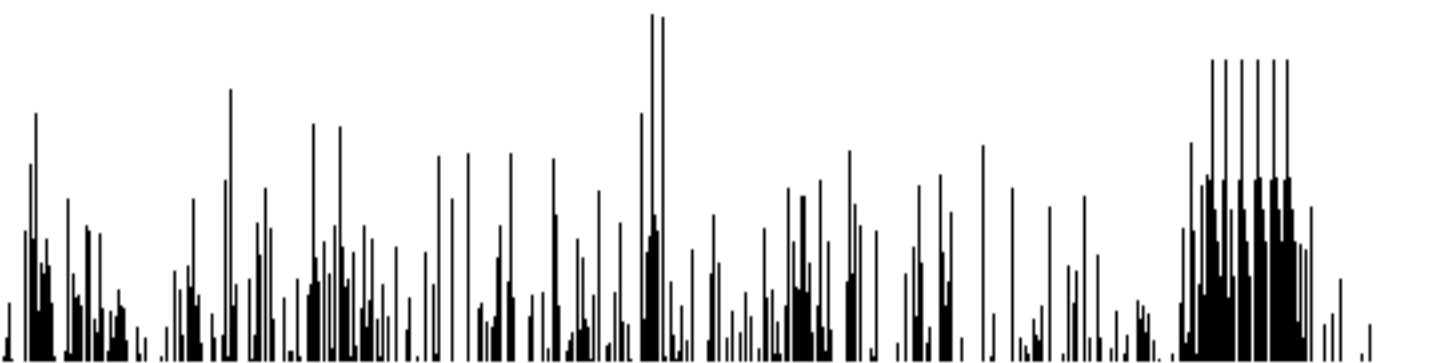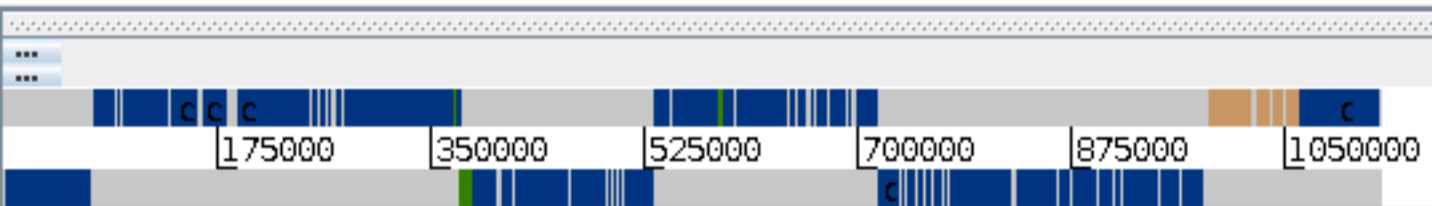

Chromosome 28

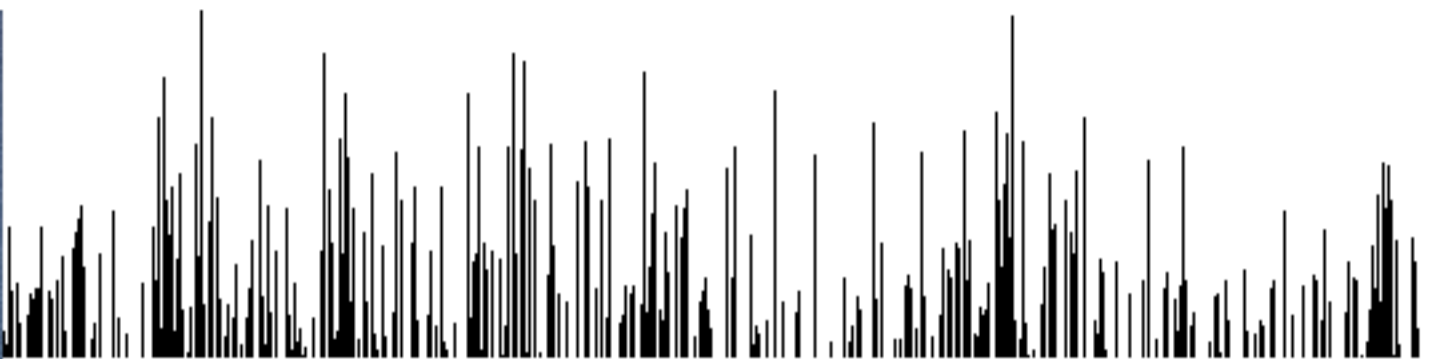

\*\*\*

\*\*\*

175000

350000

525000

700000

875000

1050000

C

Chromosome 29

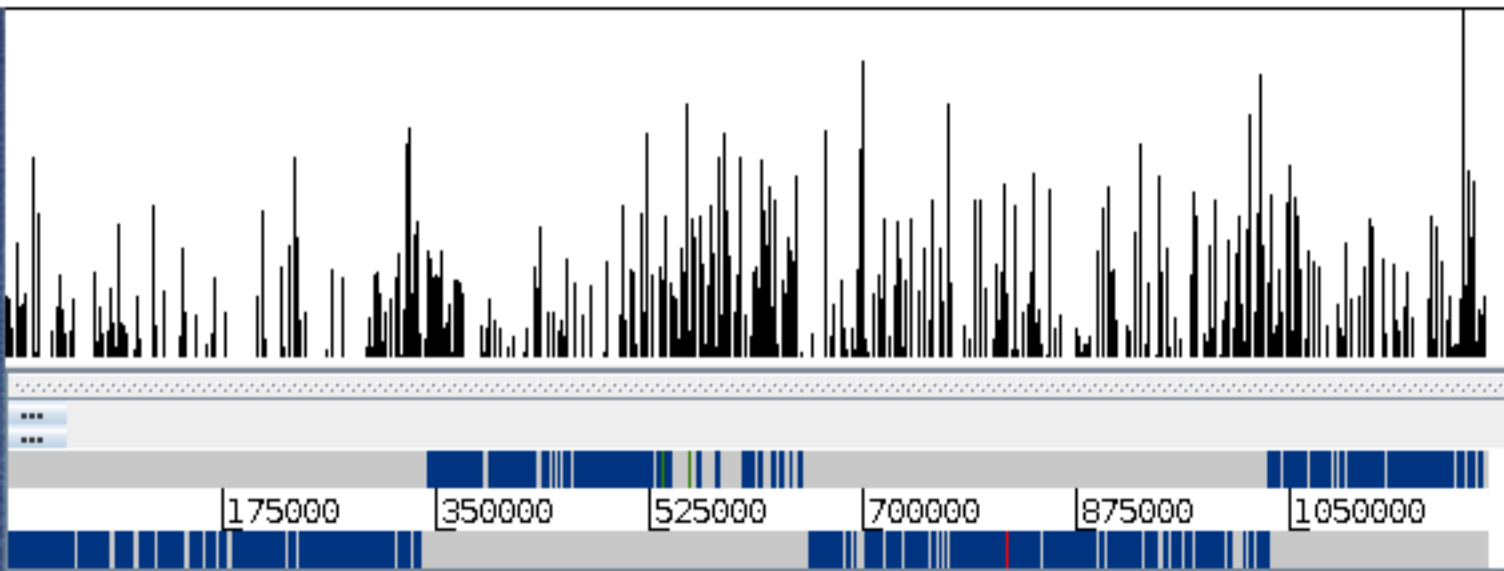

Chromosome 30

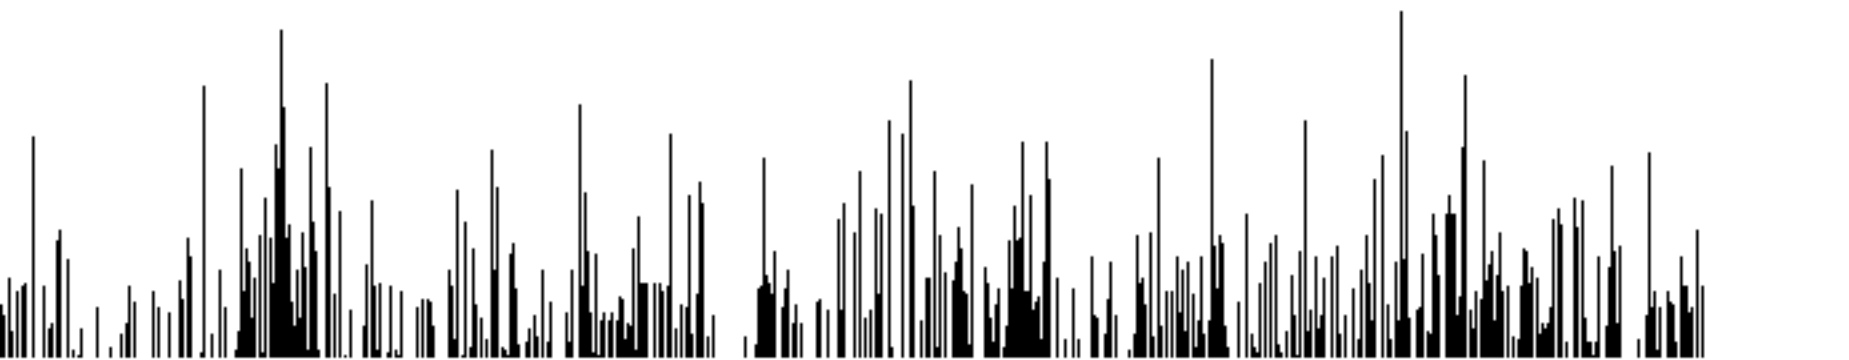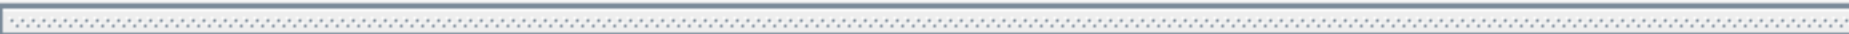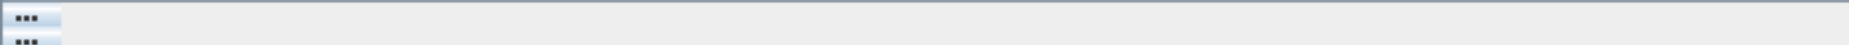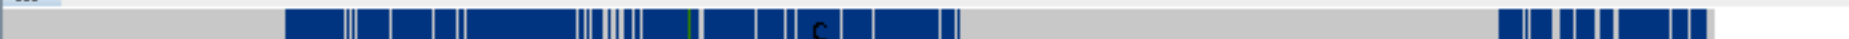

C

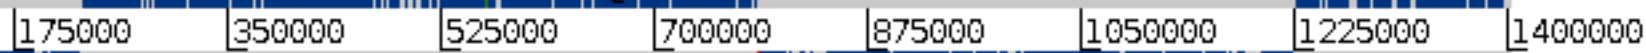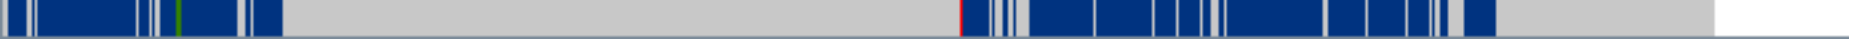

Chromosome 31

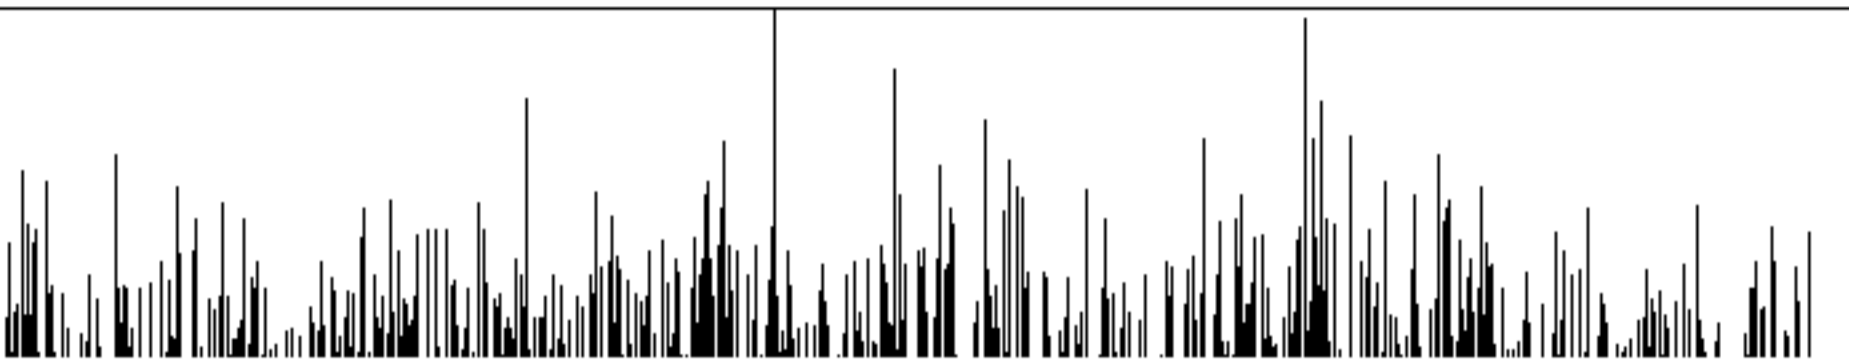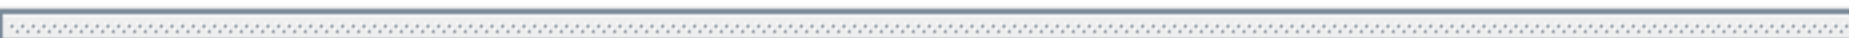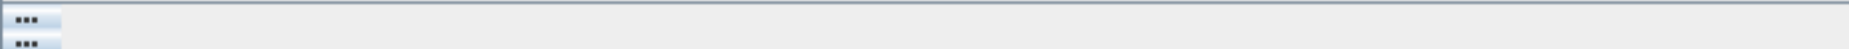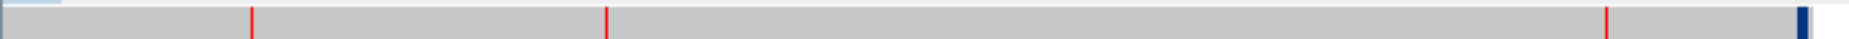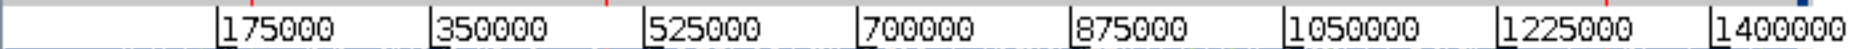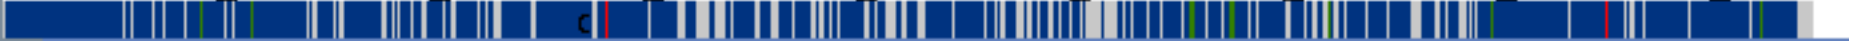



Chromosome 32

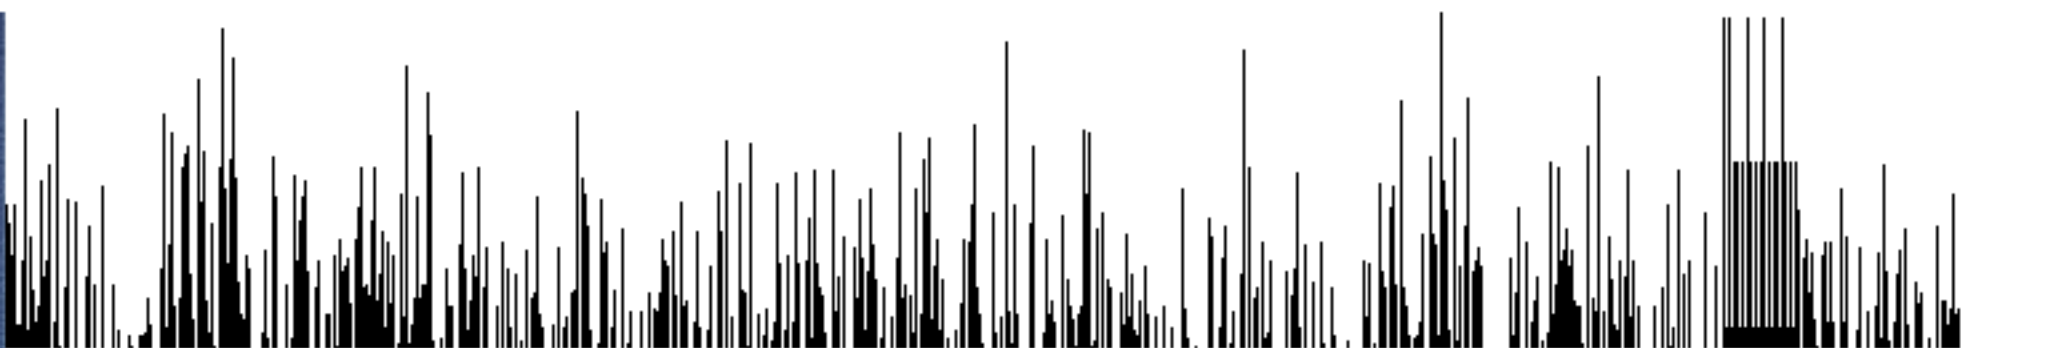

\*\*\*  
\*\*\*

175000 350000 525000 700000 875000 1050000 1225000 1400000 1575000

C

Chromosome 33

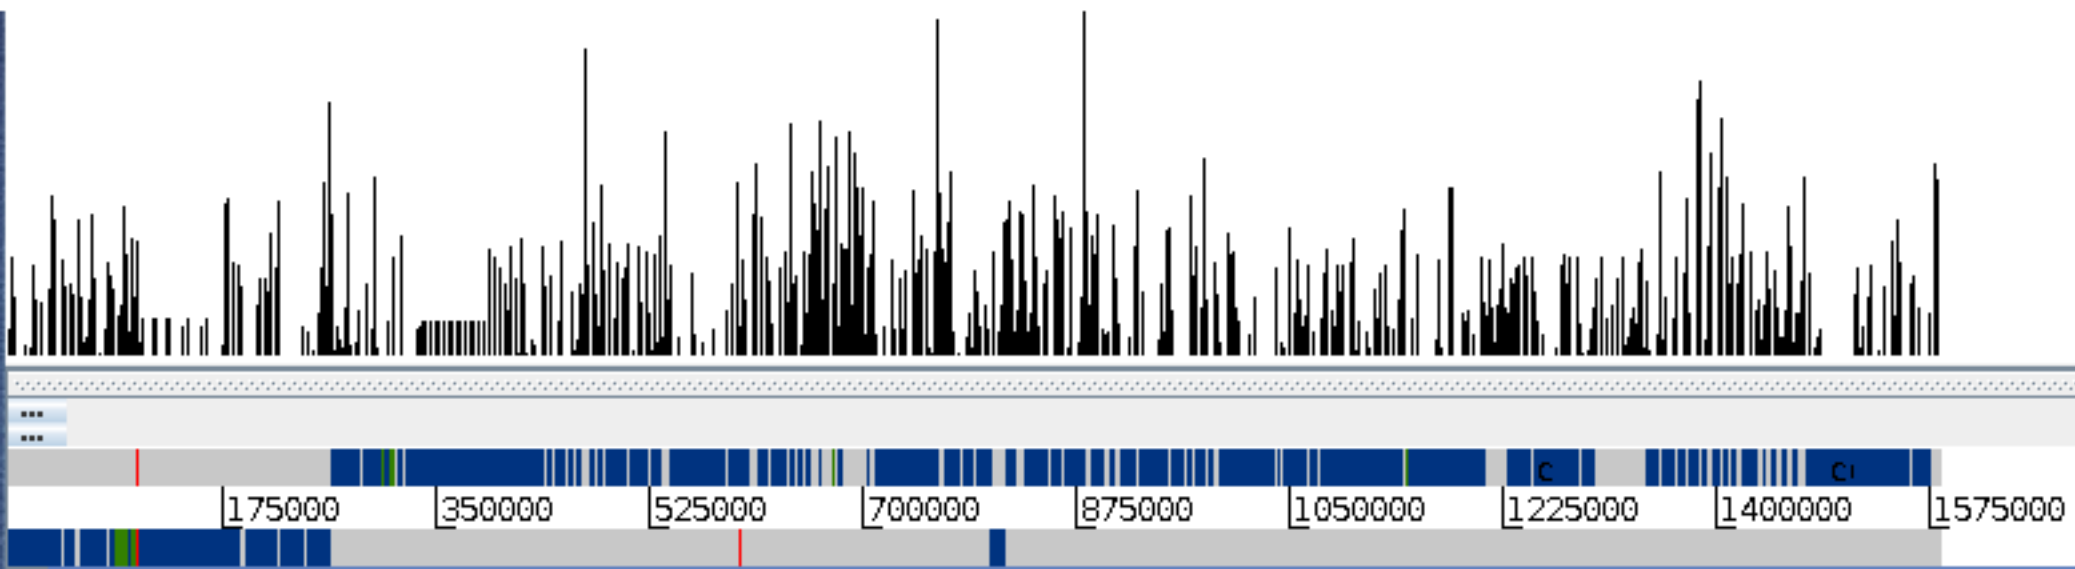

Chromosome 34

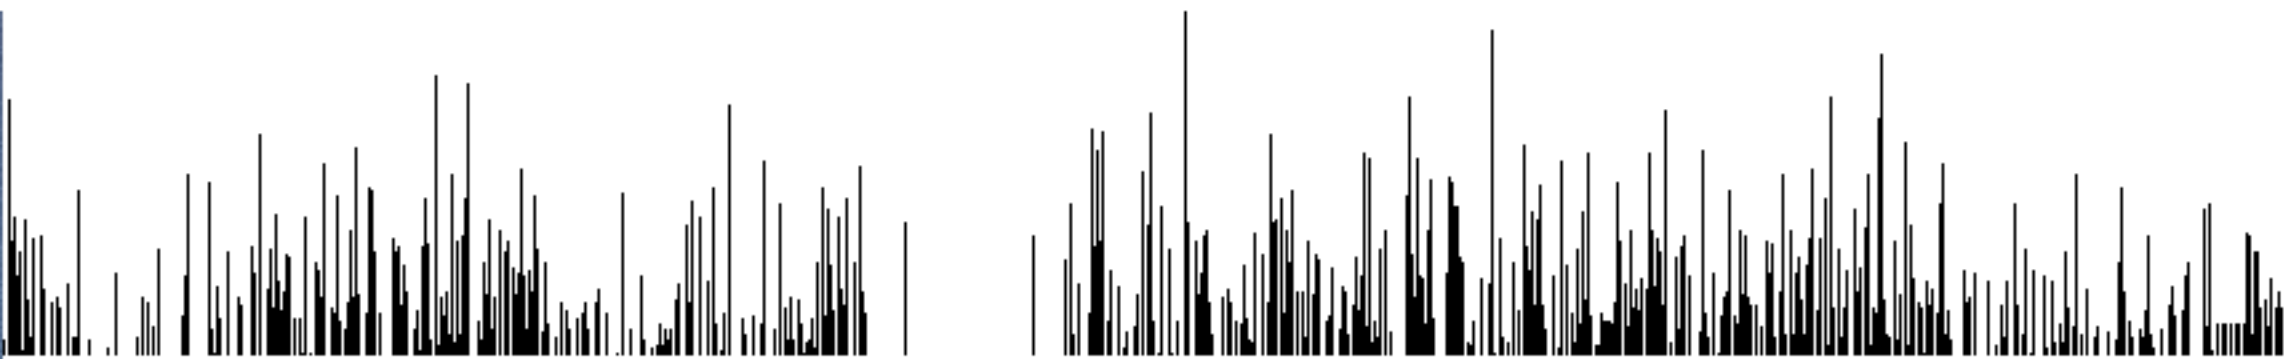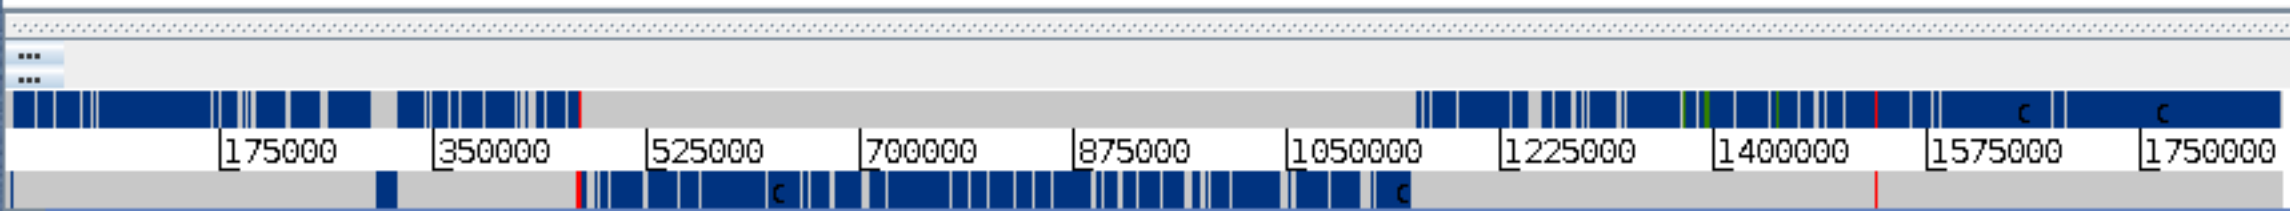

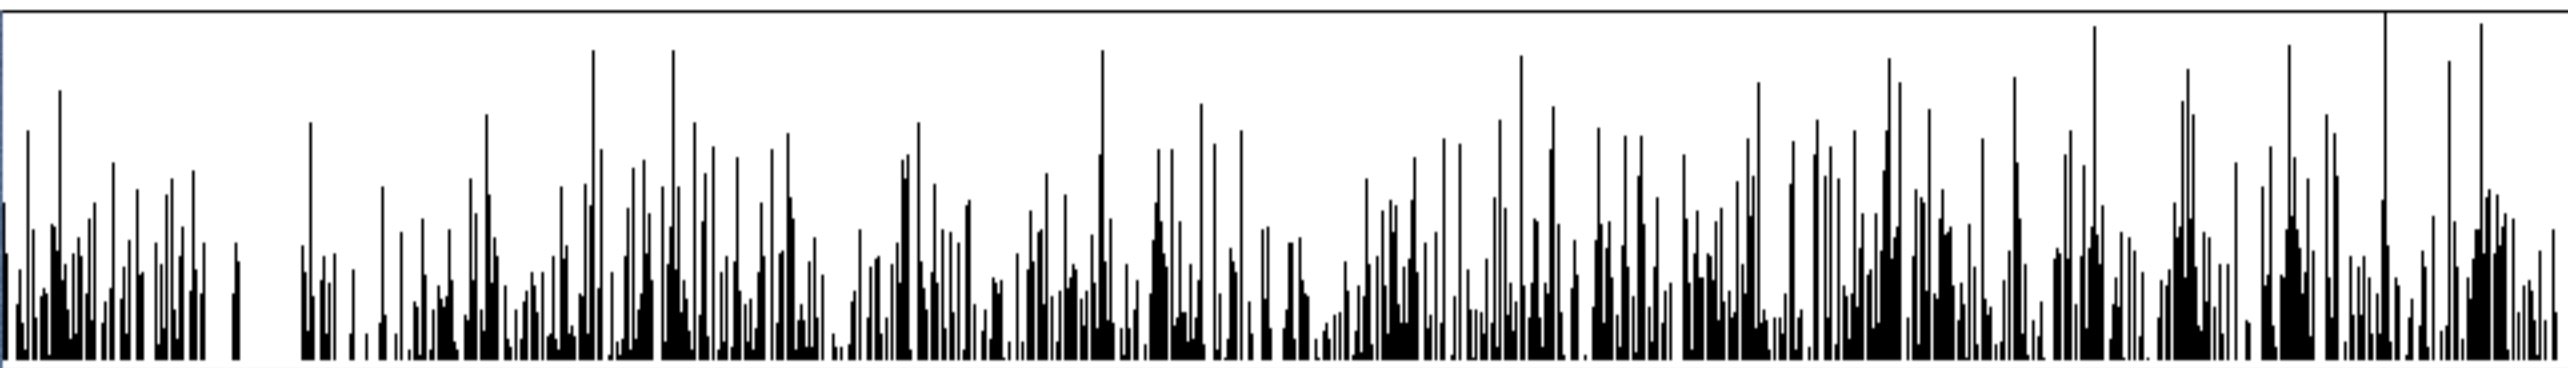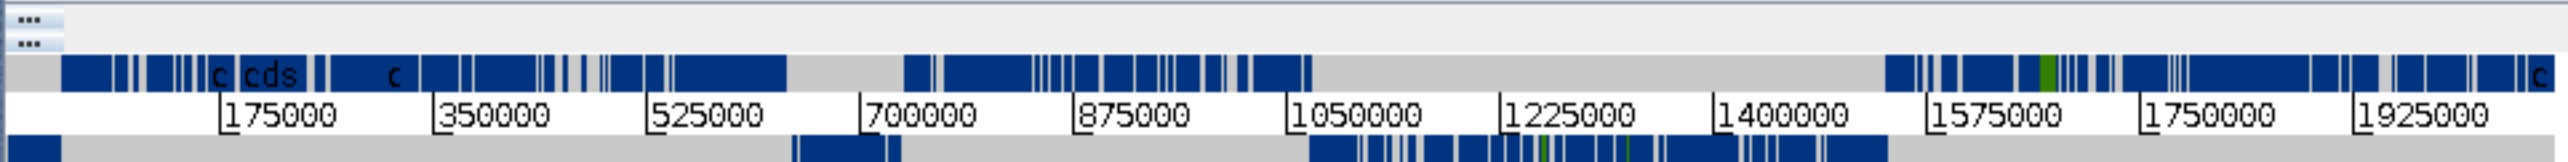

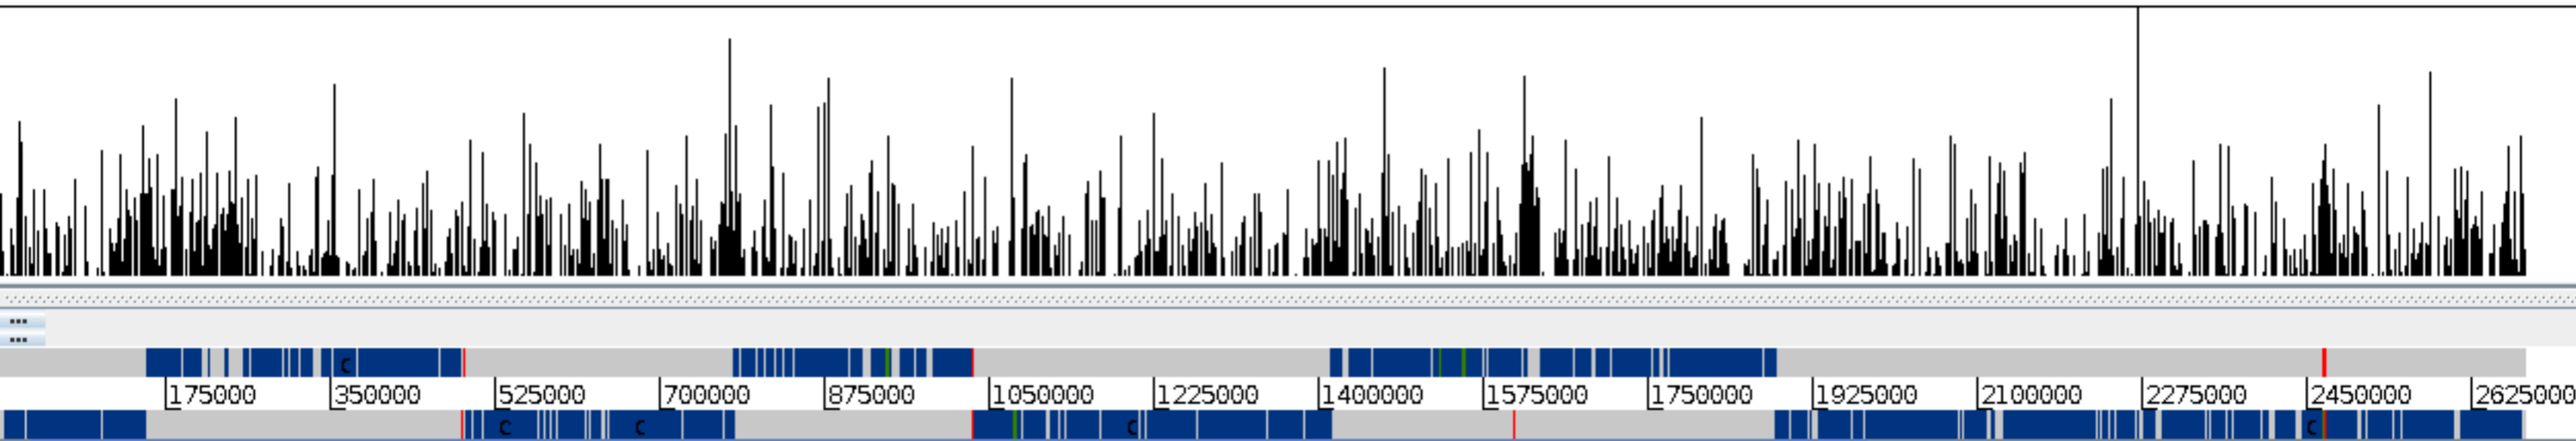

Supplement: pone.0063068.s005.pdf [file pone.0063068.s005.pdf]
