# Supplementary material for: Genomic Analysis of Sequence-Dependent DNA Curvature in Leishmania
Source: PubMed Central journal article supplement (PMC3639952; doi:10.1371/journal.pone.0063068), 2013-04-30

**S Figure 6. Graphical representation of IC for regions with high RIIIC-score for all *L. major* chromosomes.**

The graphs are the same as figure 1. IC for regions with high RIIIC score are indicated at the top. Sites associated with acetylated H3 histone (19) are indicated as small vertical lines.

# Chromosome 1

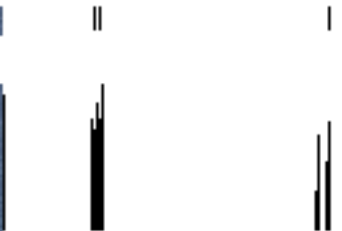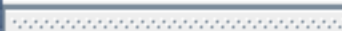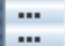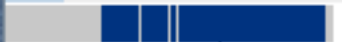

175000

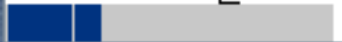

# Chromosome 2

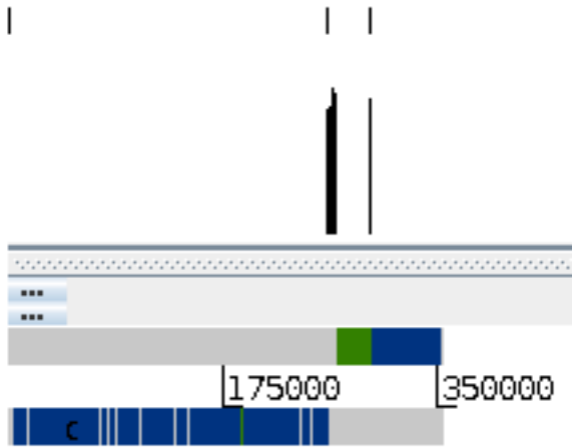

# Chromosome 3

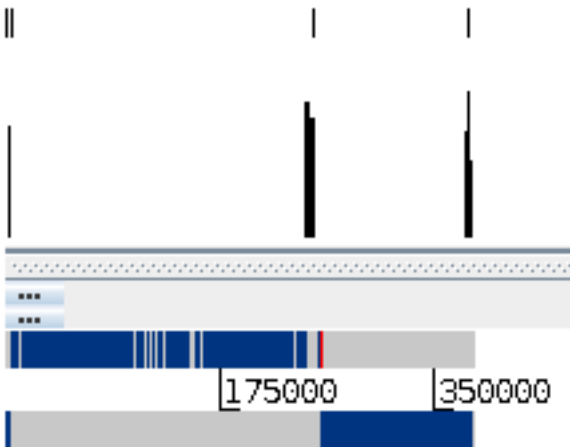

# Chromosome 4

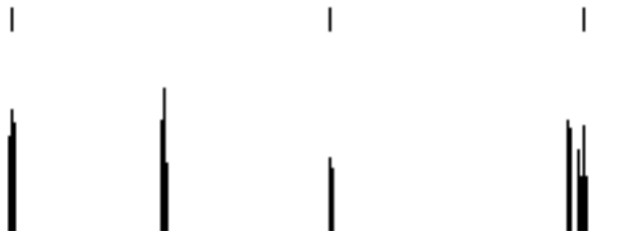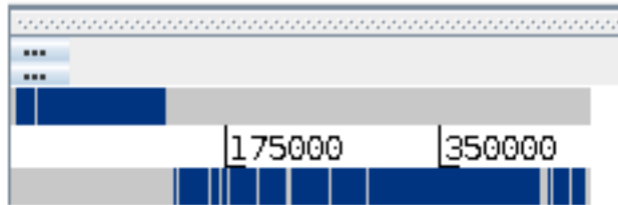

# Chromosome 5

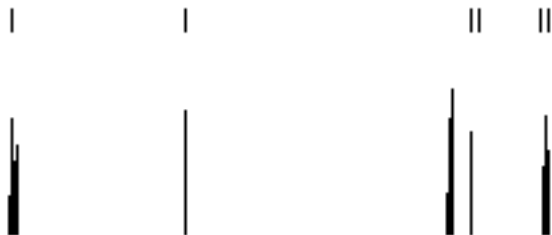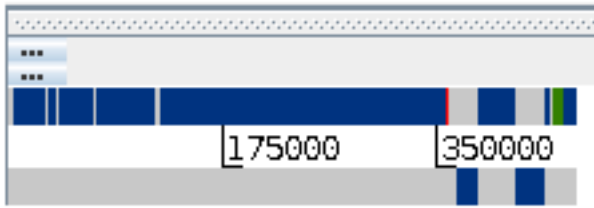

# Chromosome 6

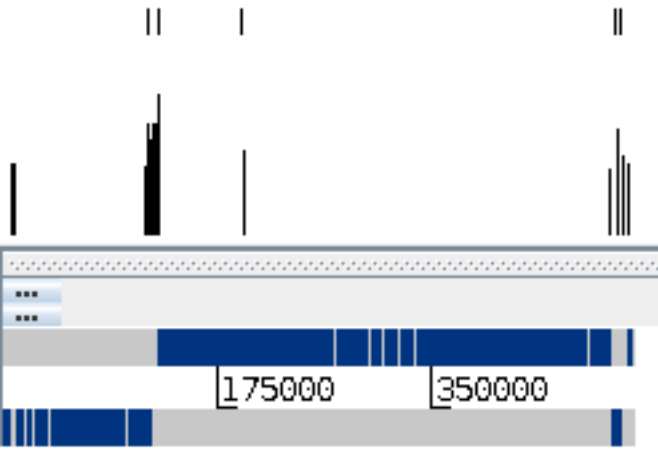

# Chromosome 7

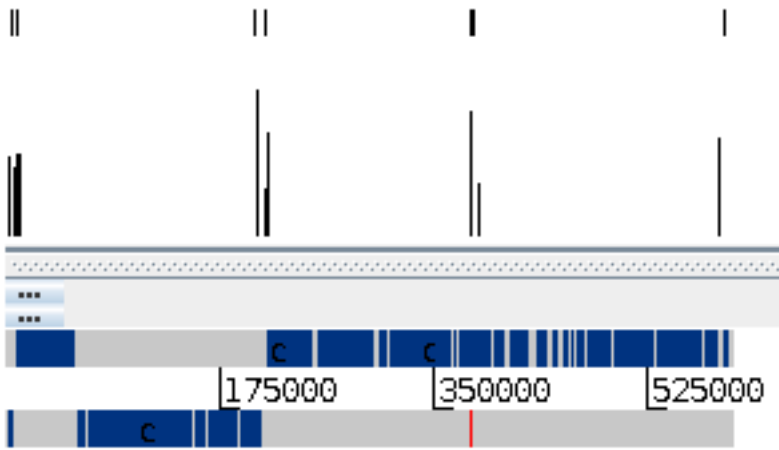



# Chromosome 8

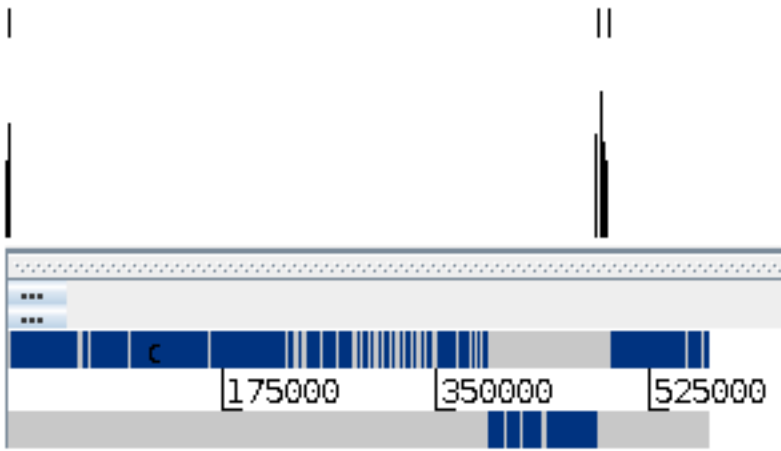

# Chromosome 9

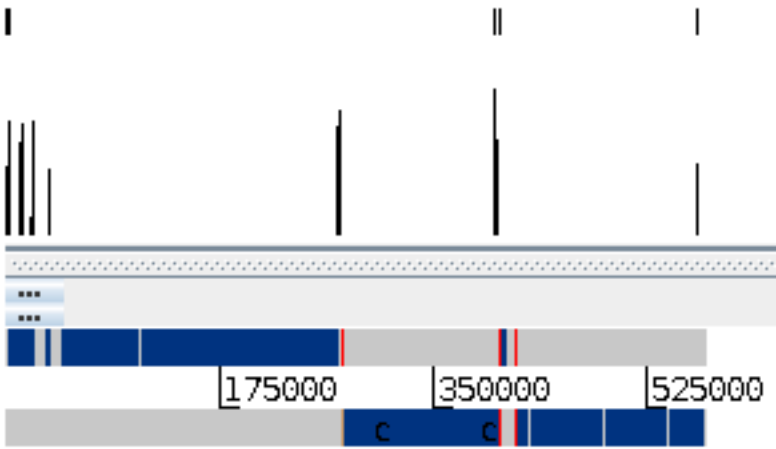

# Chromosome 10

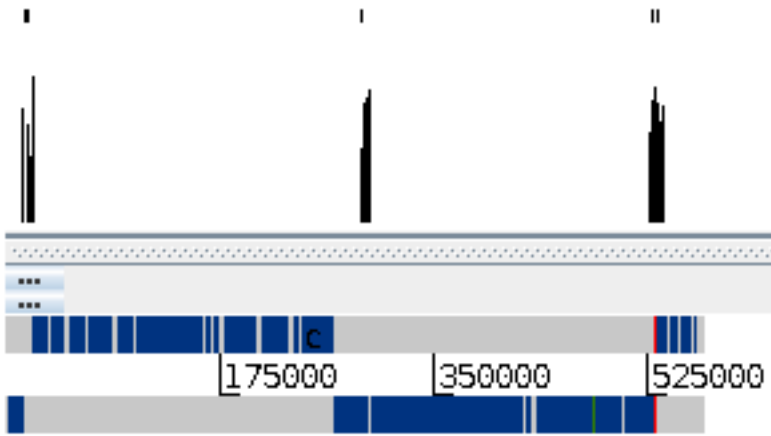

# Chromosome 11

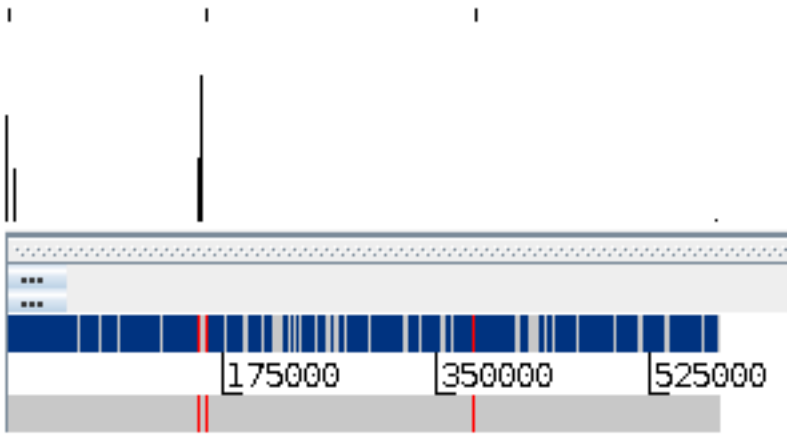

# Chromosome 12

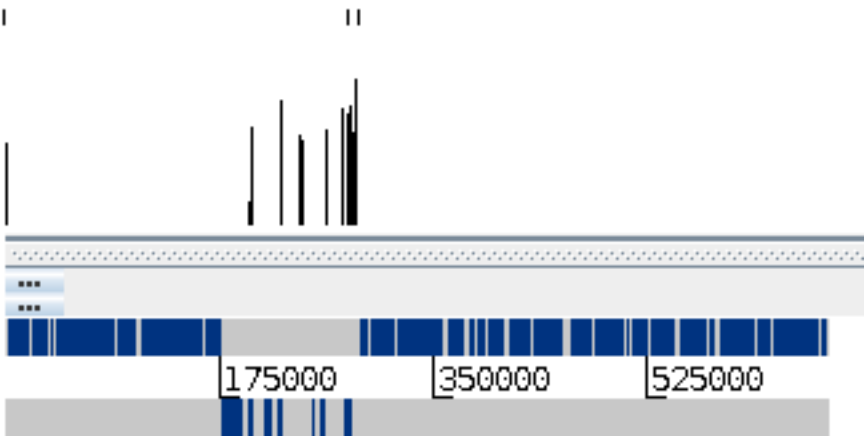

# Chromosome 13

11

1

1

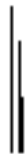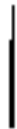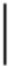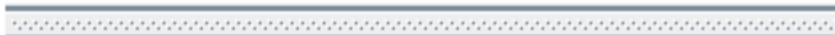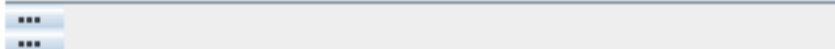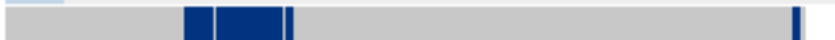

175000

350000

525000

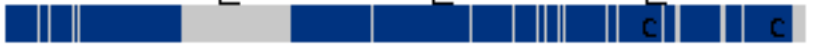

# Chromosome 14

I

II

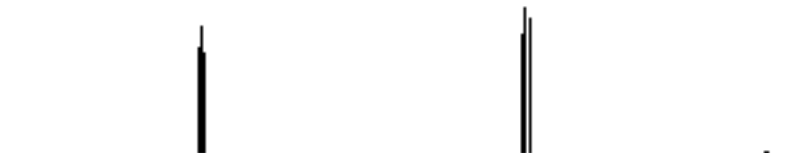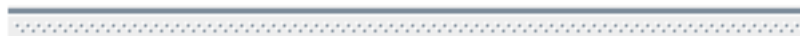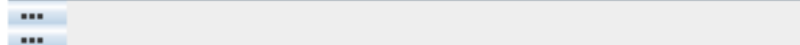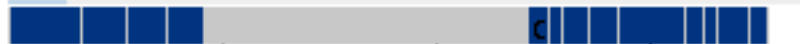

175000

350000

525000

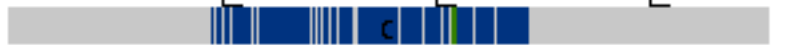

# Chromosome 15

||

||

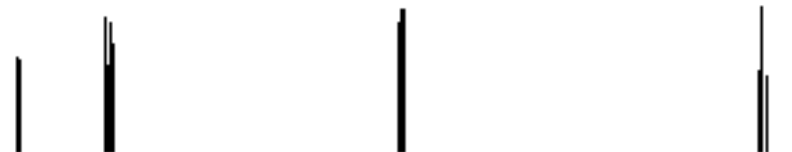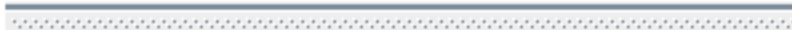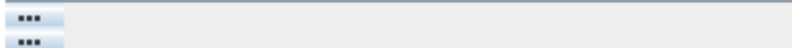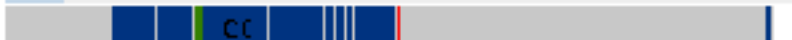

175000

350000

525000

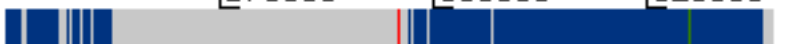



Chromosome 16

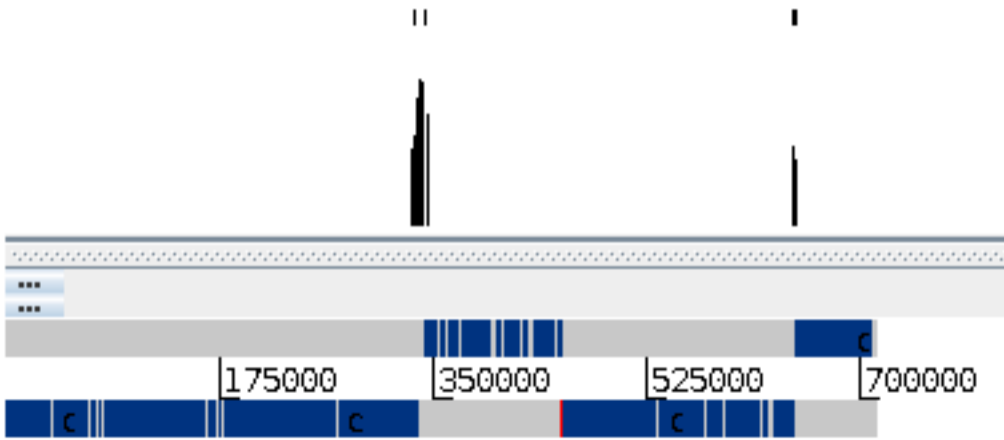

# Chromosome 17

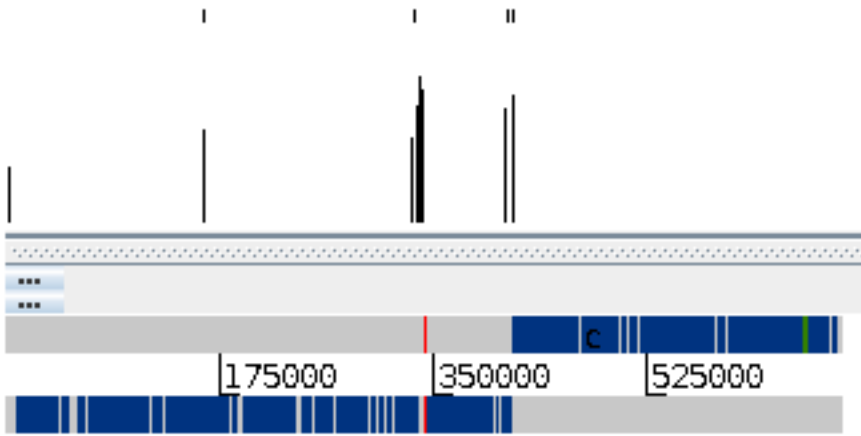

Chromosome 18

||

|

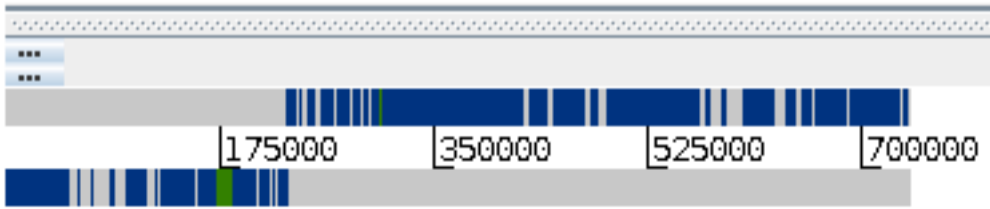

# Chromosome 19

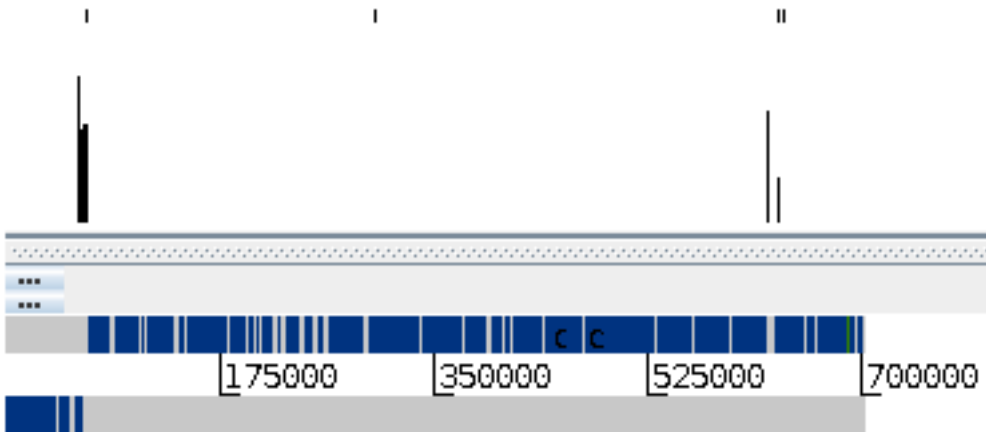

# Chromosome 20

II

I

I

I

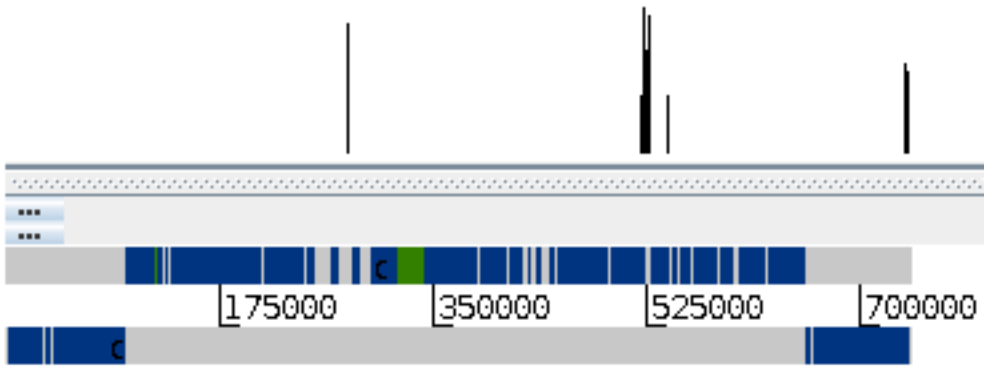

# Chromosome 21

||

||

||

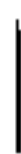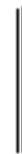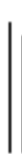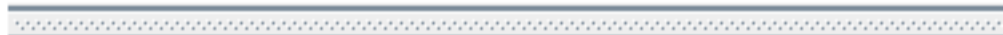

...  
...

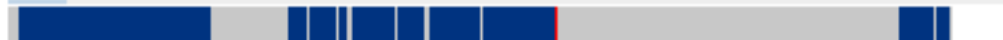

175000

350000

525000

700000

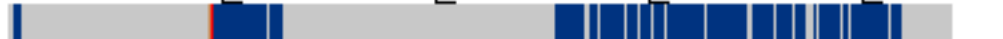

# Chromosome 22

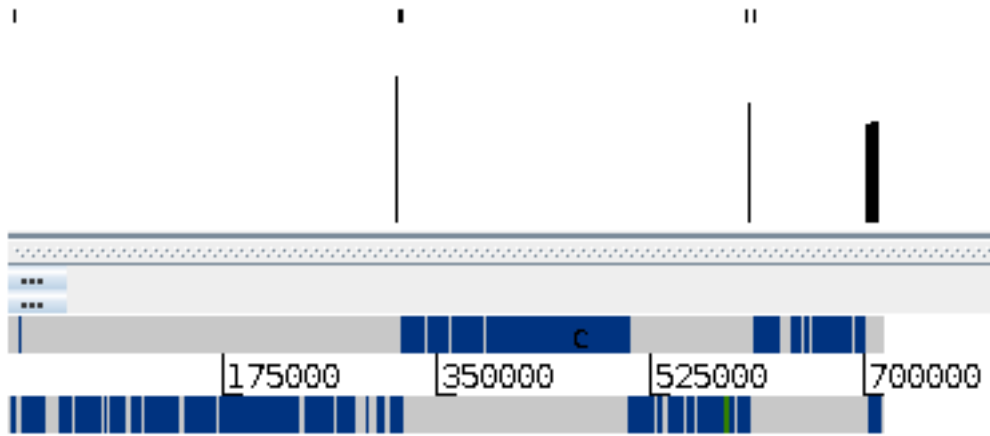

Chromosome 23

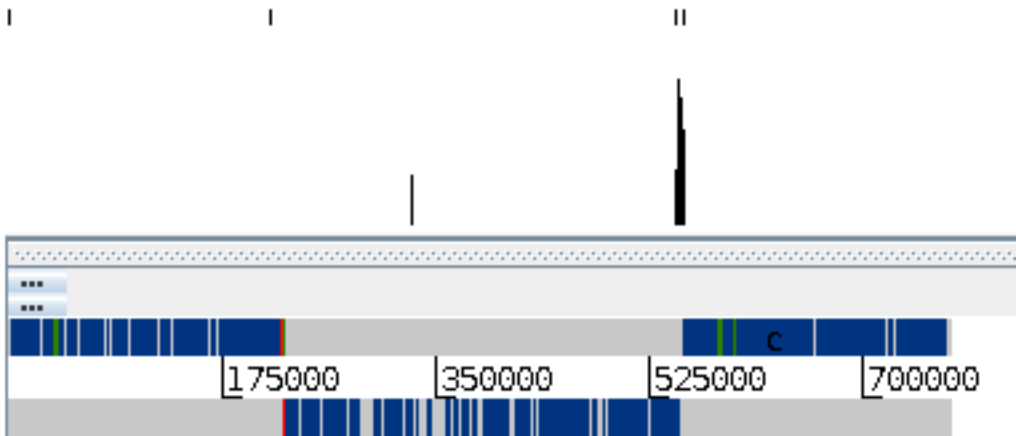



Chromosome 24

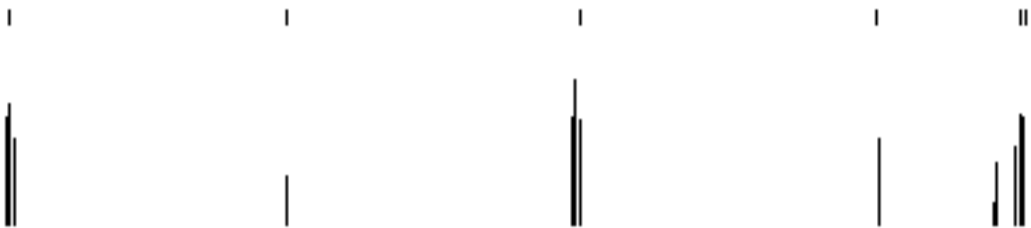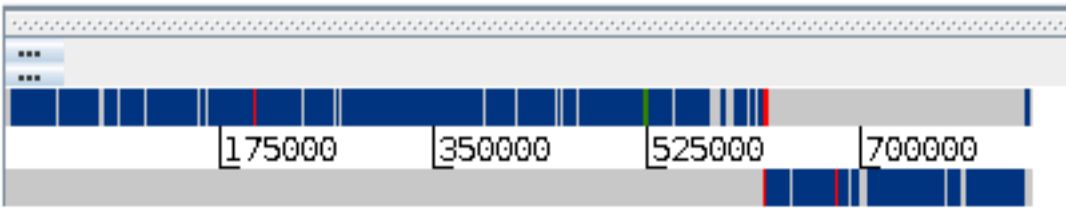

Chromosome 25

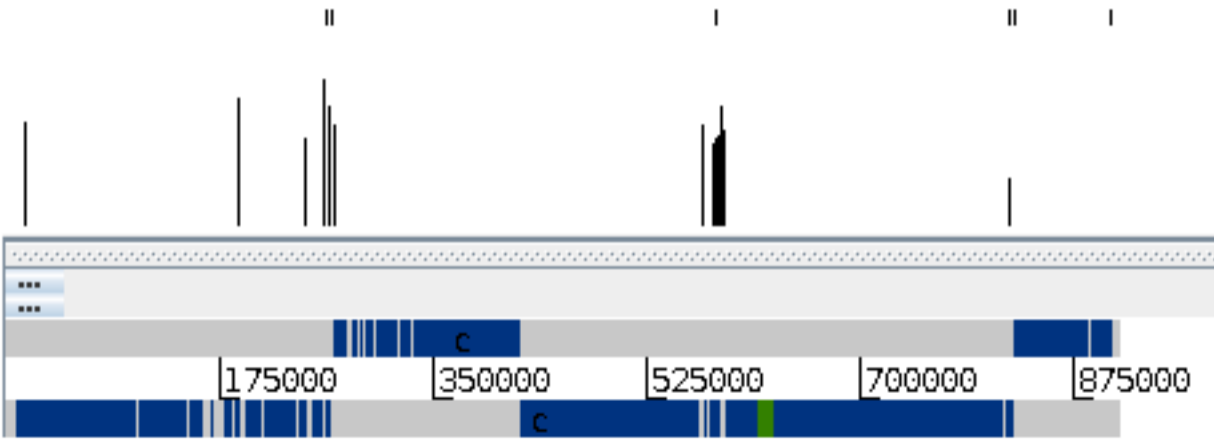

Chromosome 26

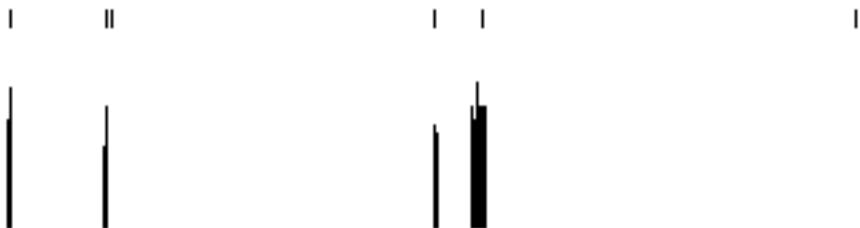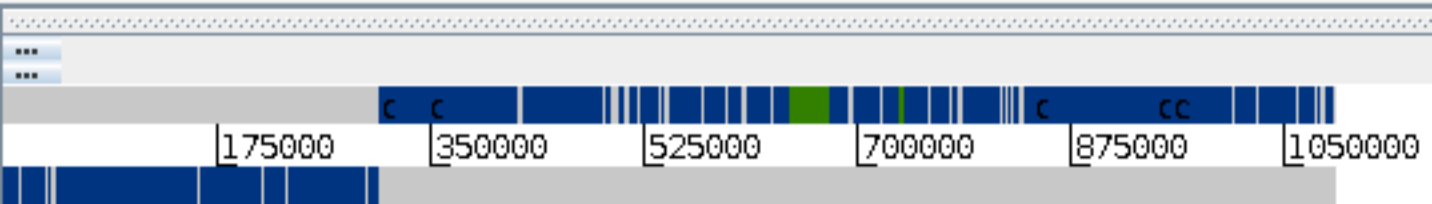

# Chromosome 27

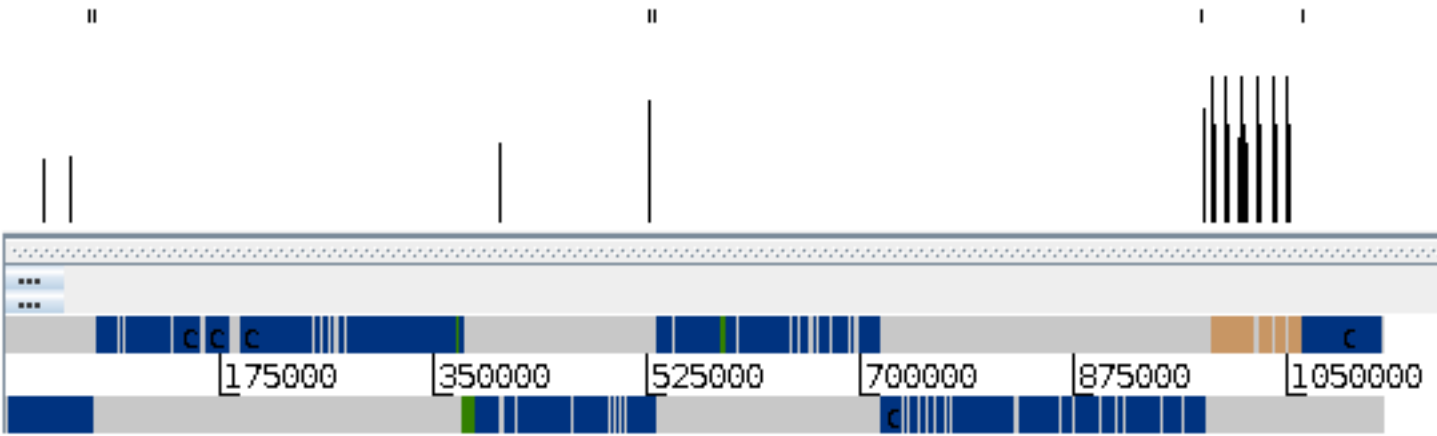

Chromosome 28

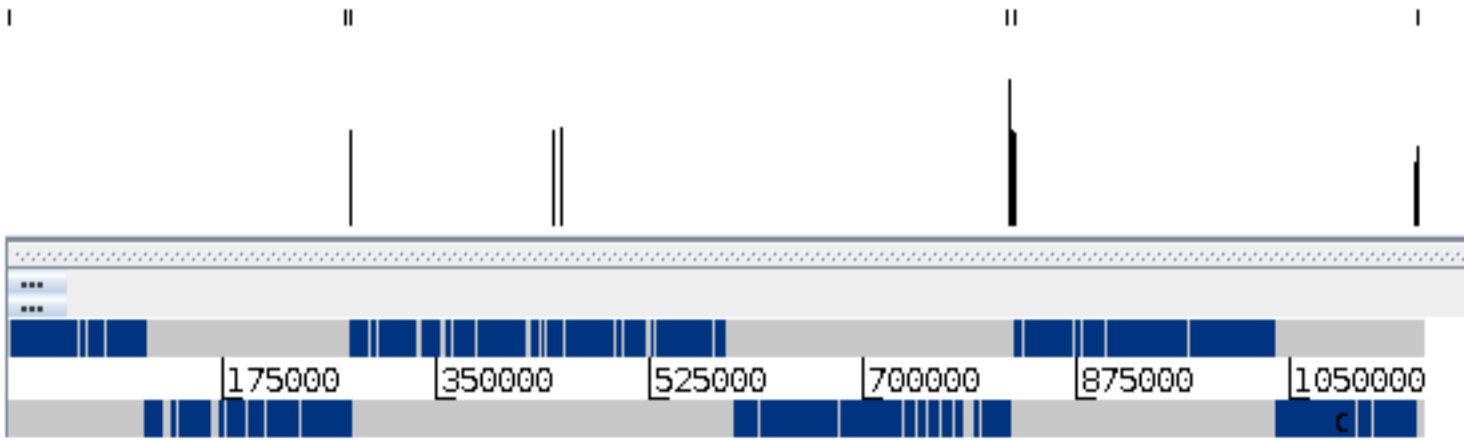

Chromosome 29

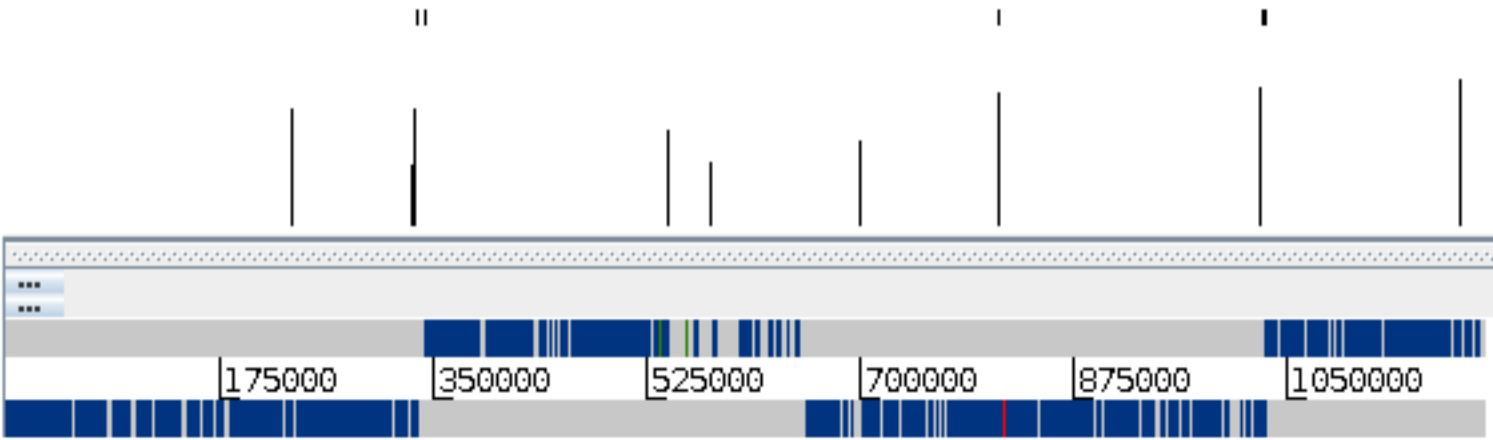

Chromosome 30

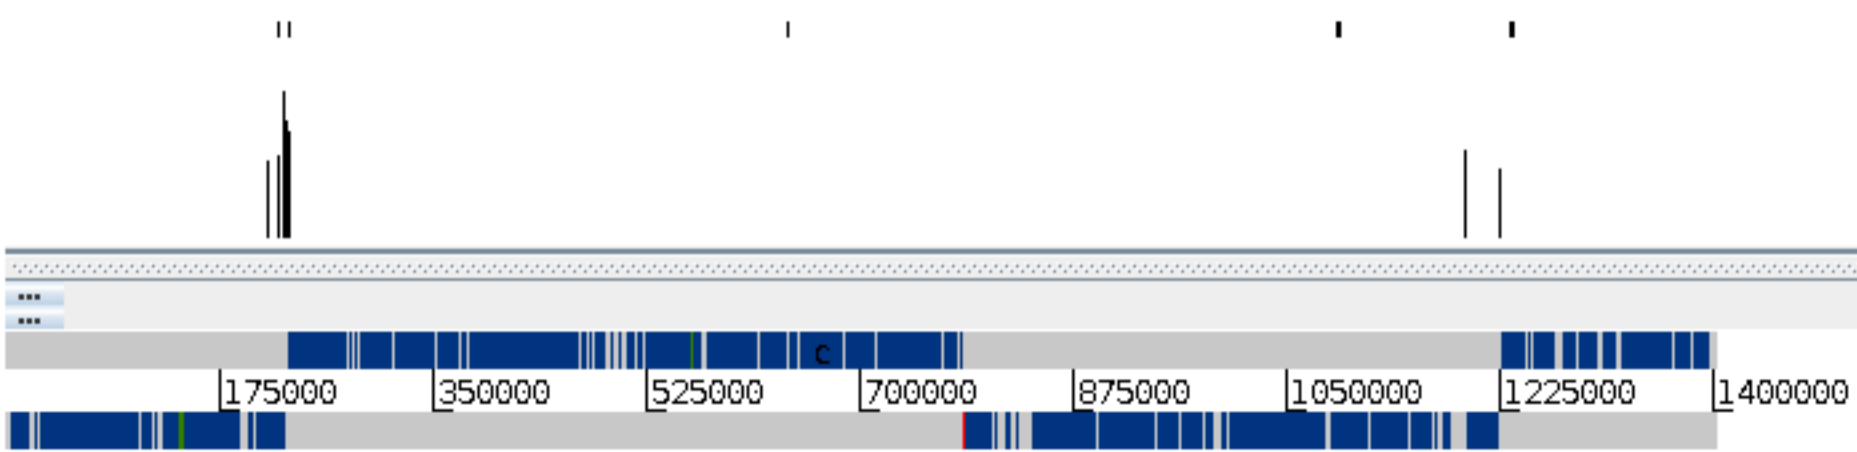

Chromosome 31

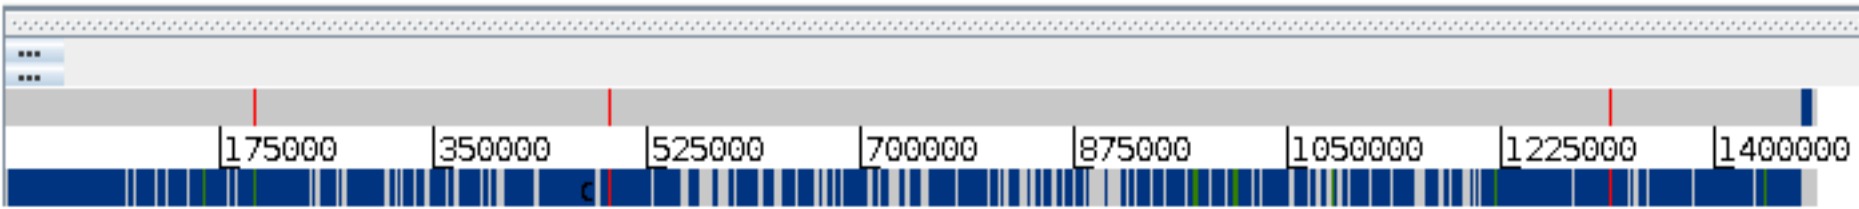



Chromosome 32

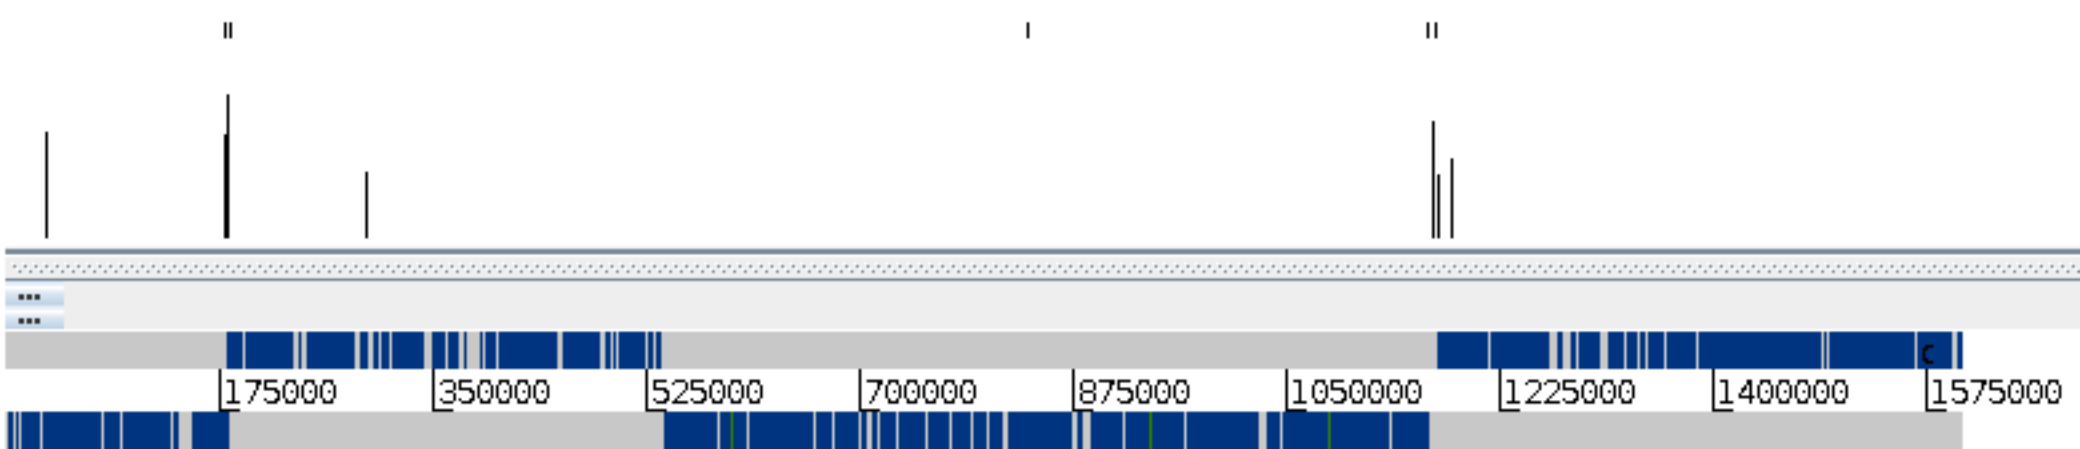

Chromosome 33

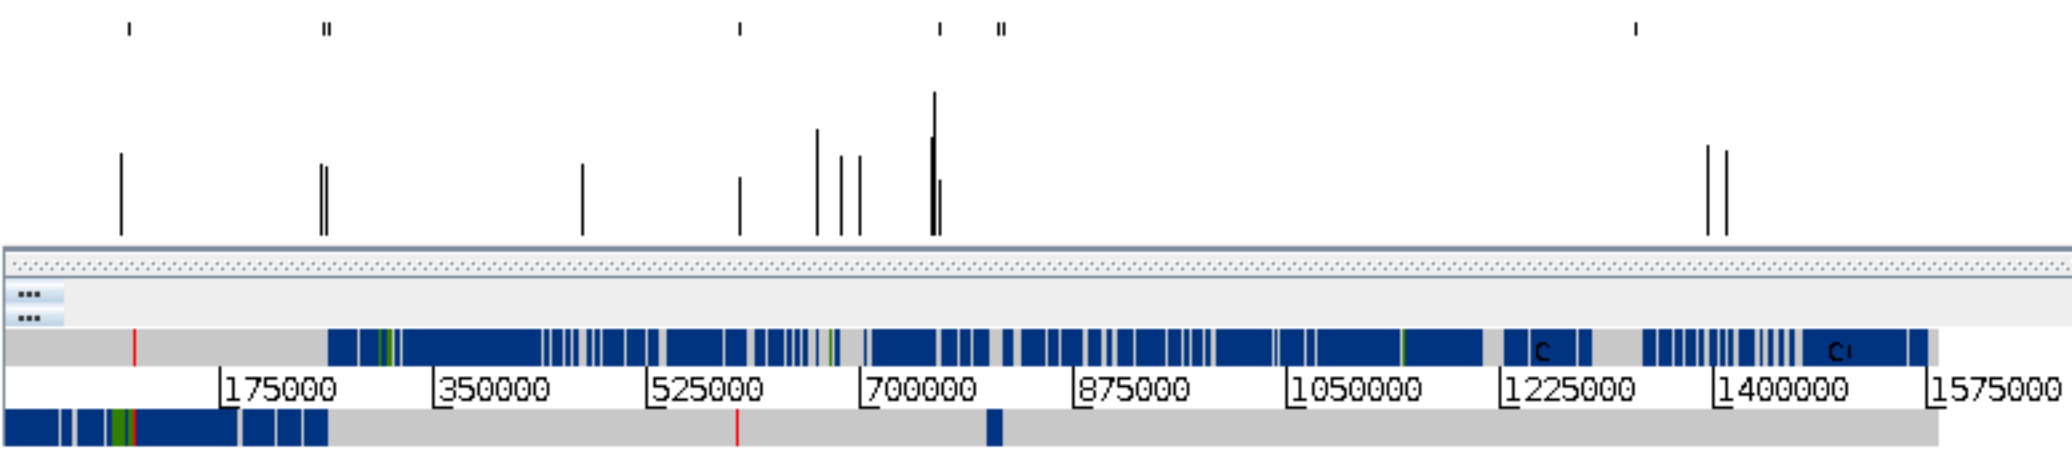

Chromosome 34

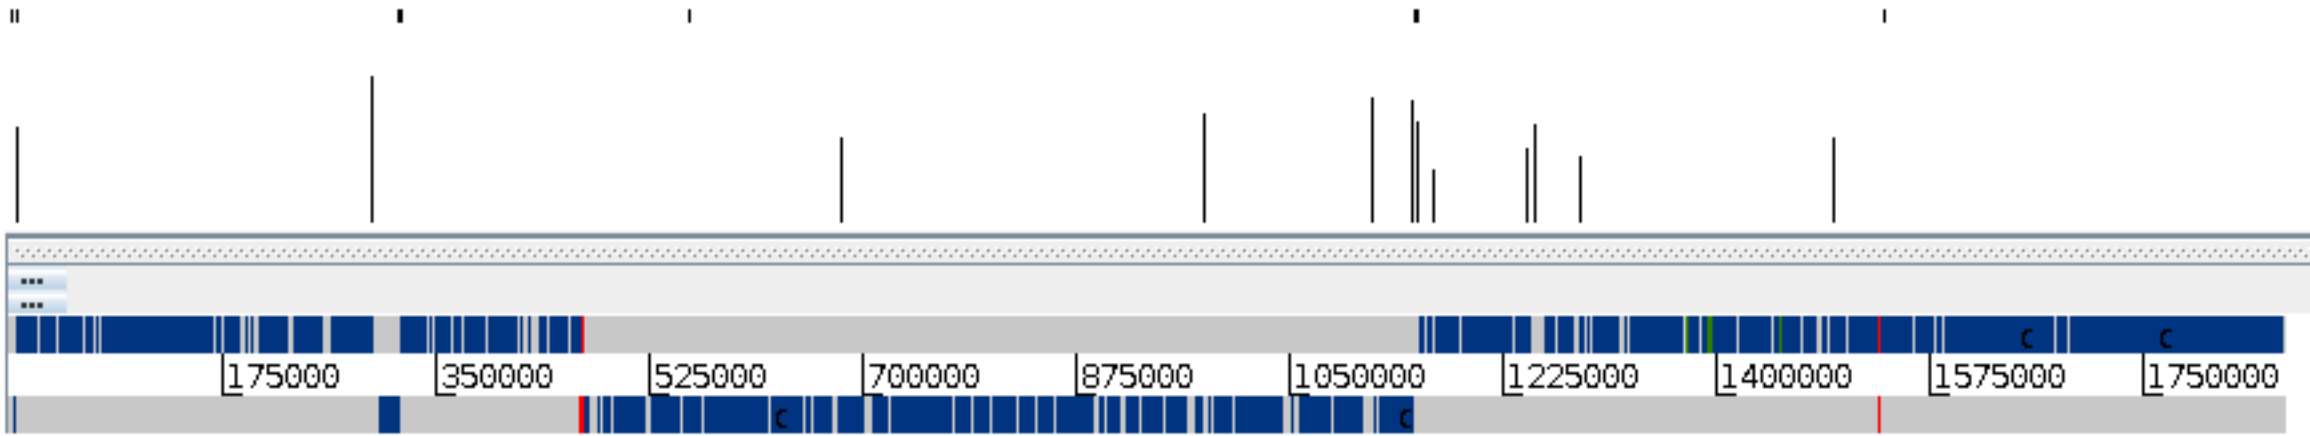

Chromosome 35

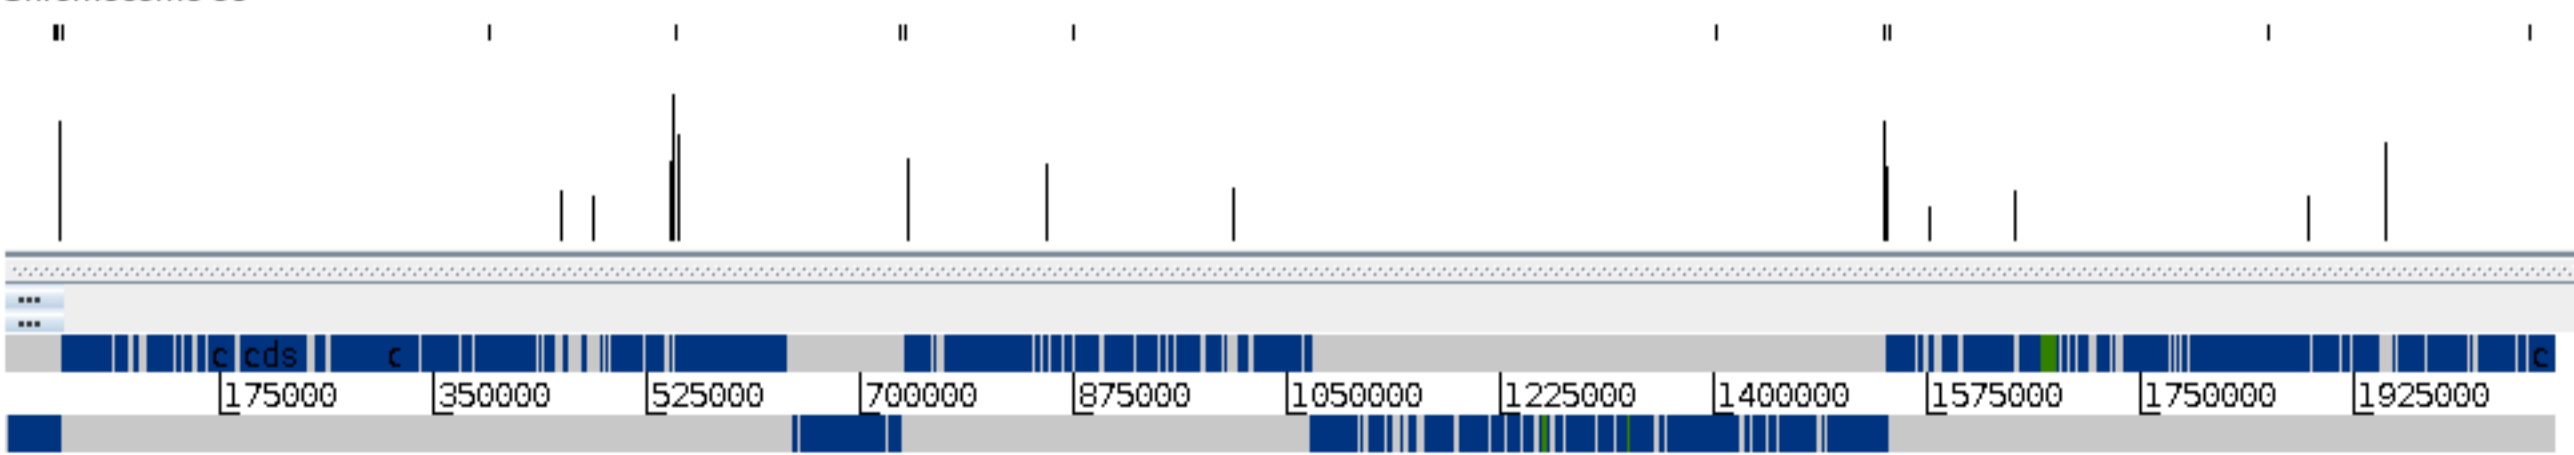

Chromosome 36

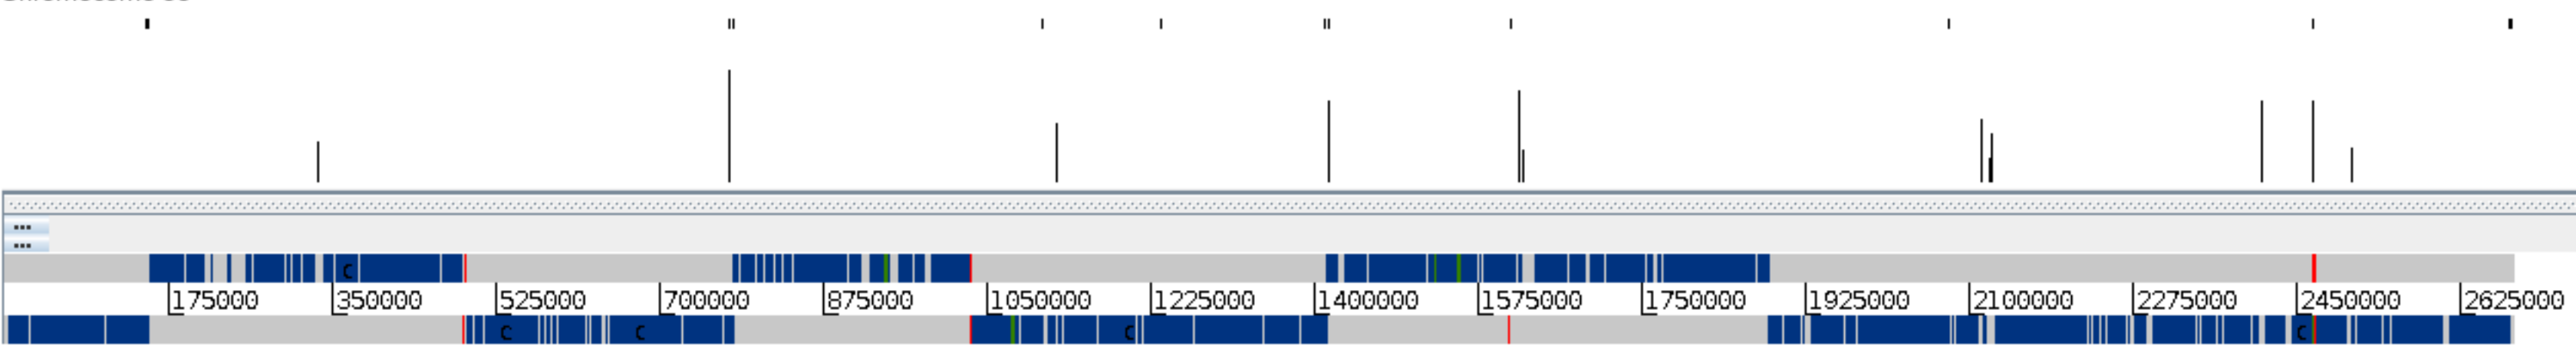

Supplement: pone.0063068.s006.pdf [file pone.0063068.s006.pdf]
