# Supplementary material for: Genomic Analysis of Sequence-Dependent DNA Curvature in Leishmania
Source: PubMed Central journal article supplement (PMC3639952; doi:10.1371/journal.pone.0063068), 2013-04-30

## **S Figure 7. Location conservation of high RIIC scoring regions in *L. major* and *L. infantum* chromosomes**

The graphs are the same as figure 1. Blast HSPs longer than 100bp and with at least 80% similarity are displayed in red scale and blue lines represent inversions.

Chromosome 1

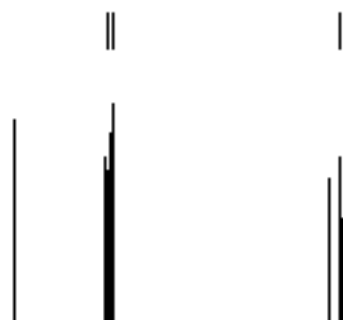

*L. major*

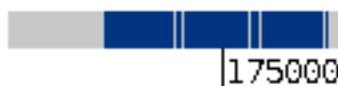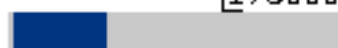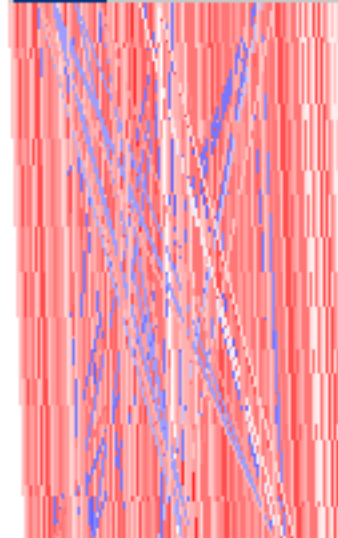

*L. infantum*

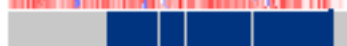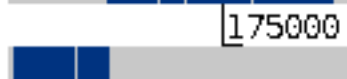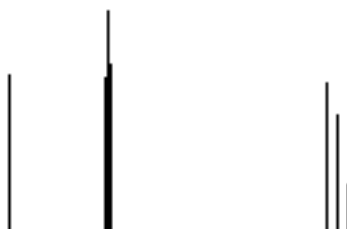

Chromosome 2

*L. major*

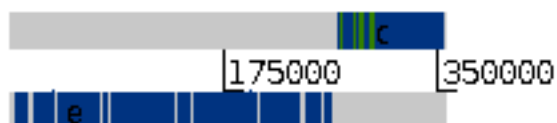

*L. infantum*

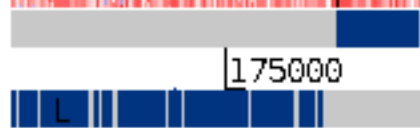

Chromosome 3

*L. major*

*L. infantum*

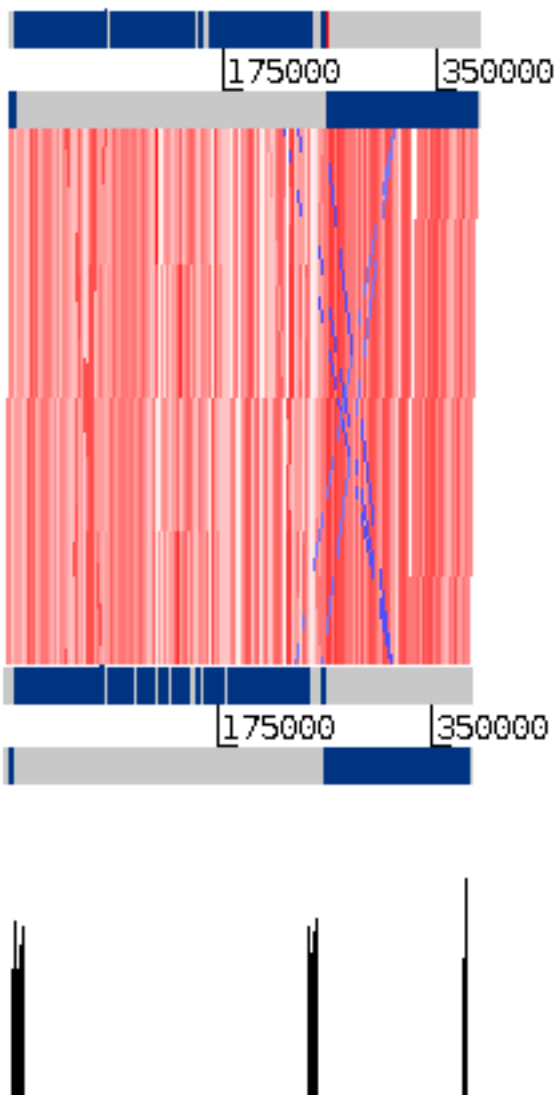

Chromosome 4

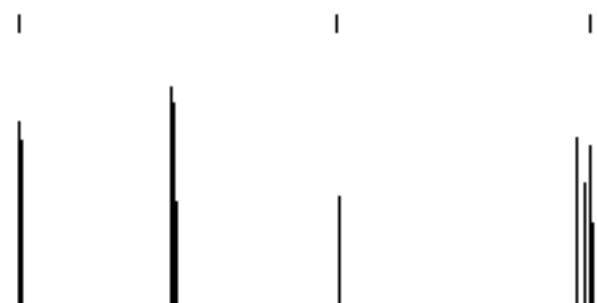

*L. major*

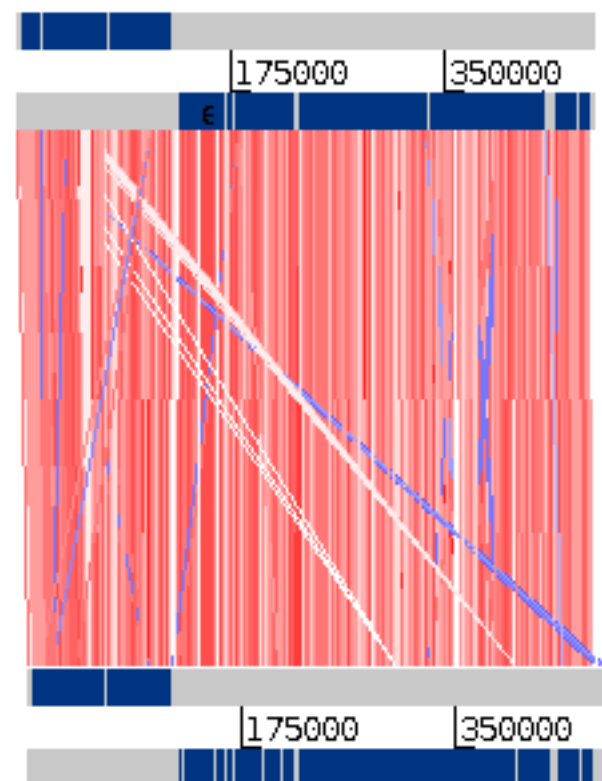

*L. infantum*

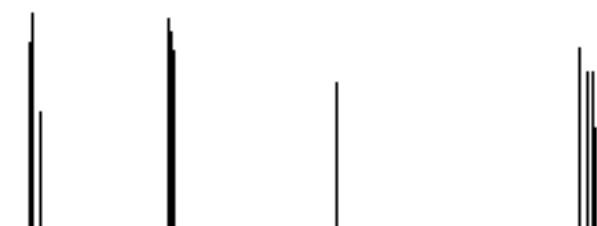

Chromosome 5

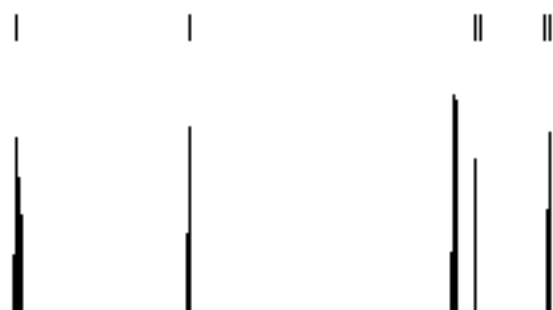

*L. major*

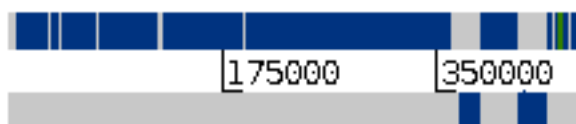

*L. infantum*

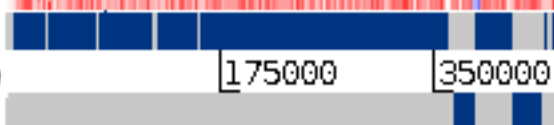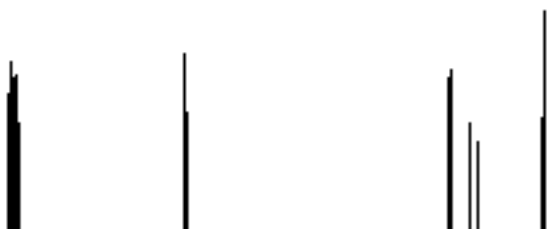

Chromosome 6

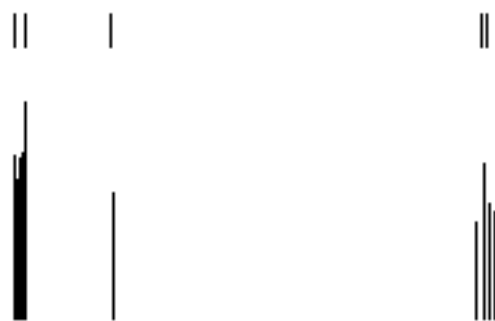

*L. major*

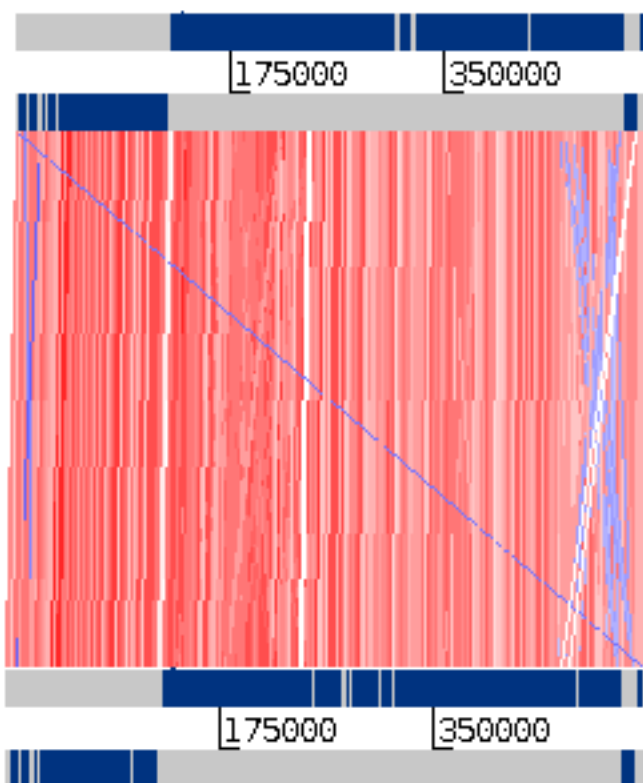

*L. infantum*

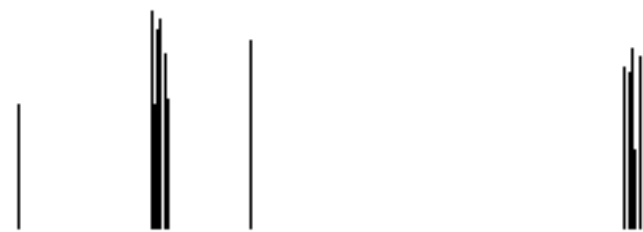

Chromosome 7

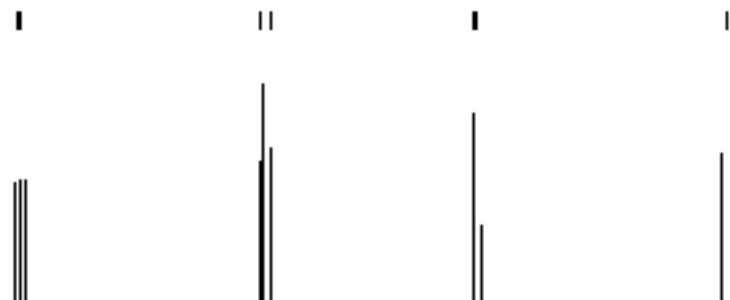

*L. major*

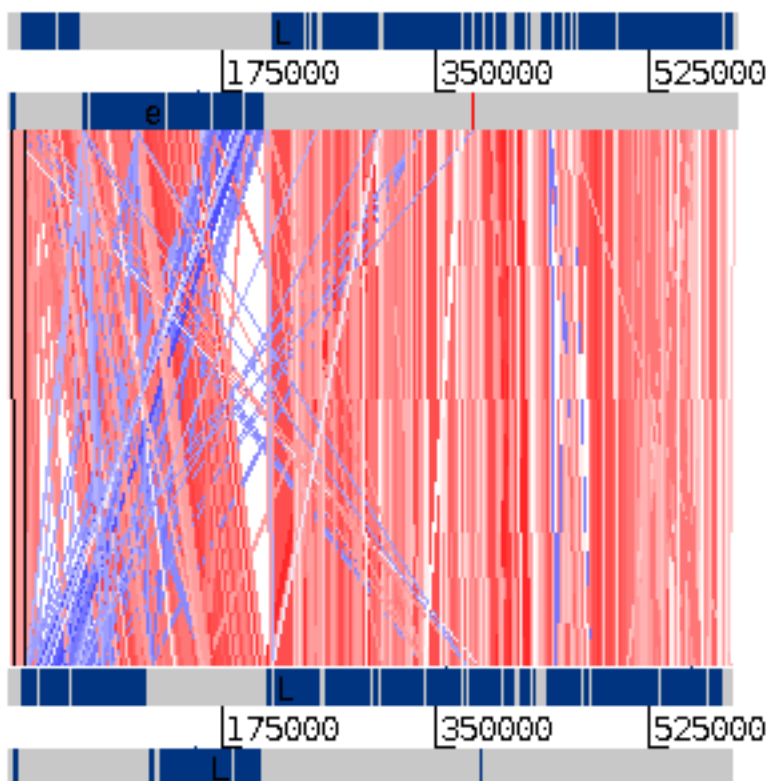

*L. infantum*

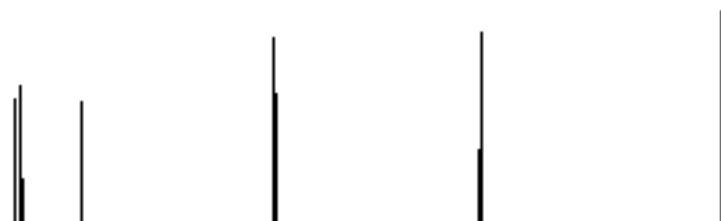



Chromosome 8

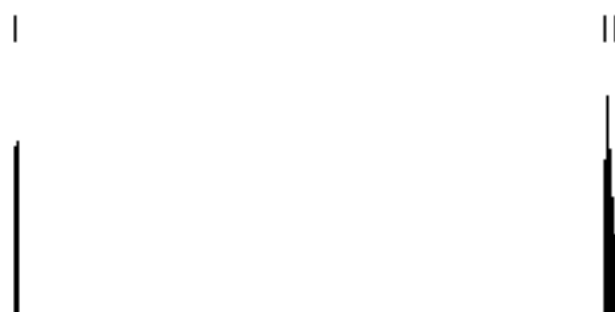

*L. major*

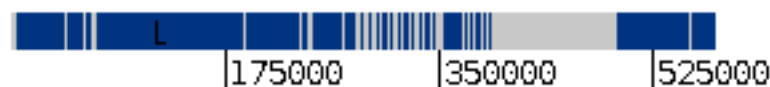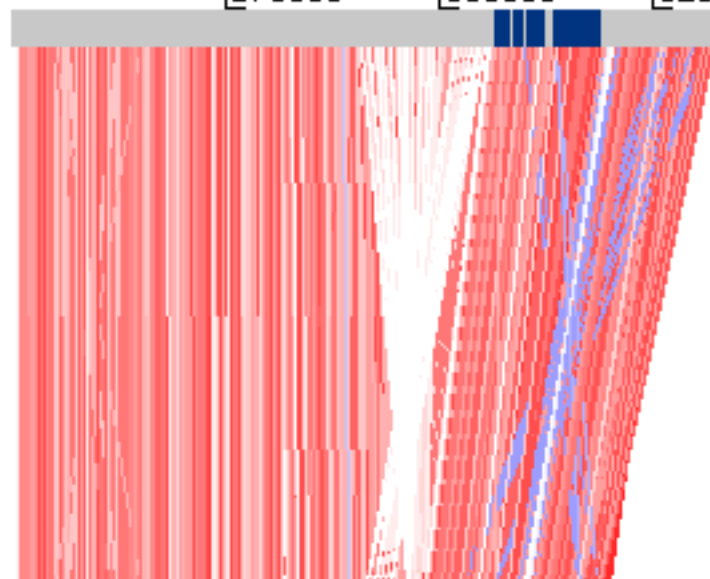

*L. infantum*

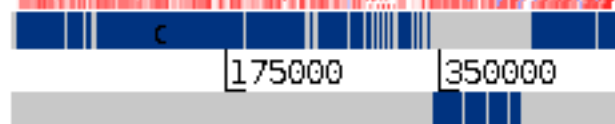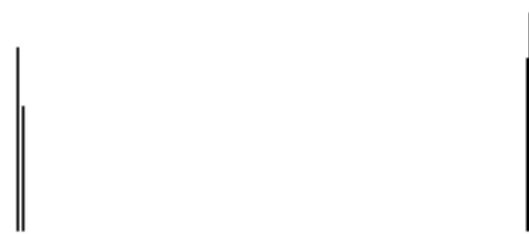

Chromosome 9

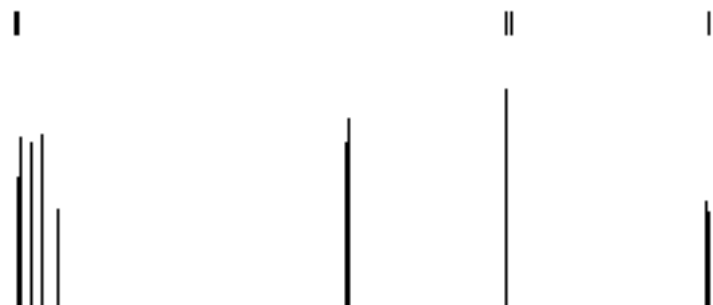

*L. major*

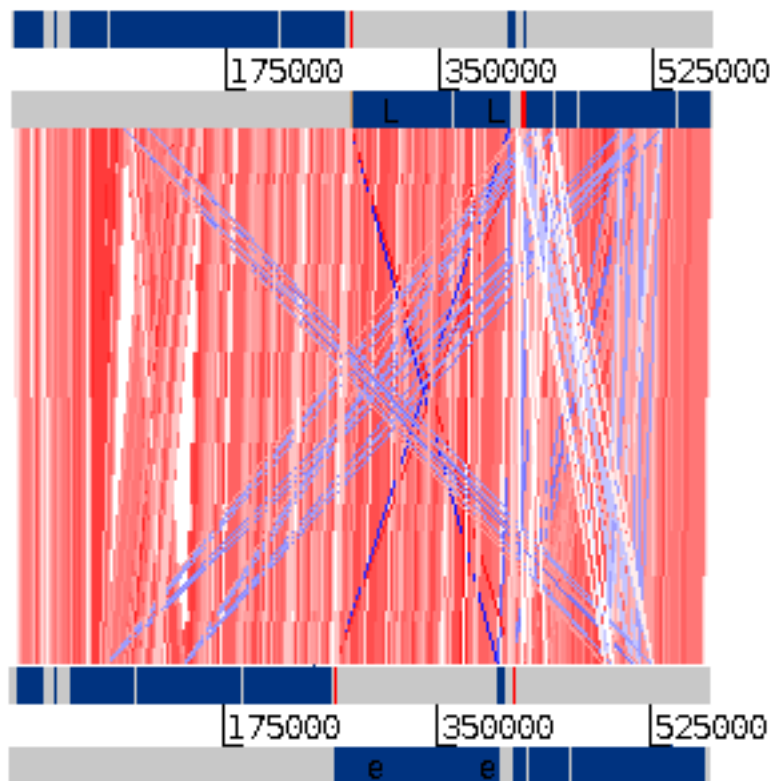

*L. infantum*

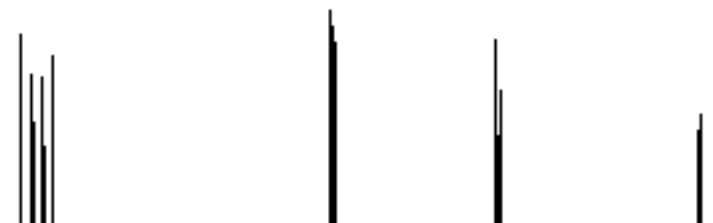

Chromosomes10

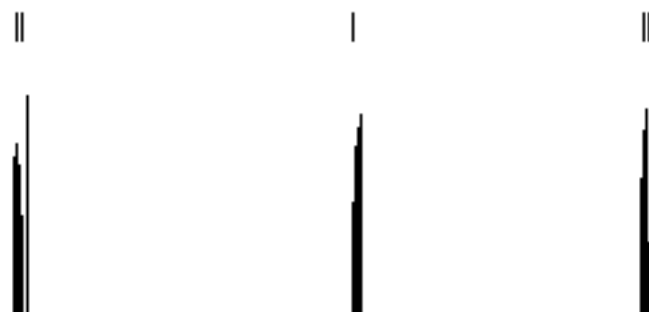

*L. major*

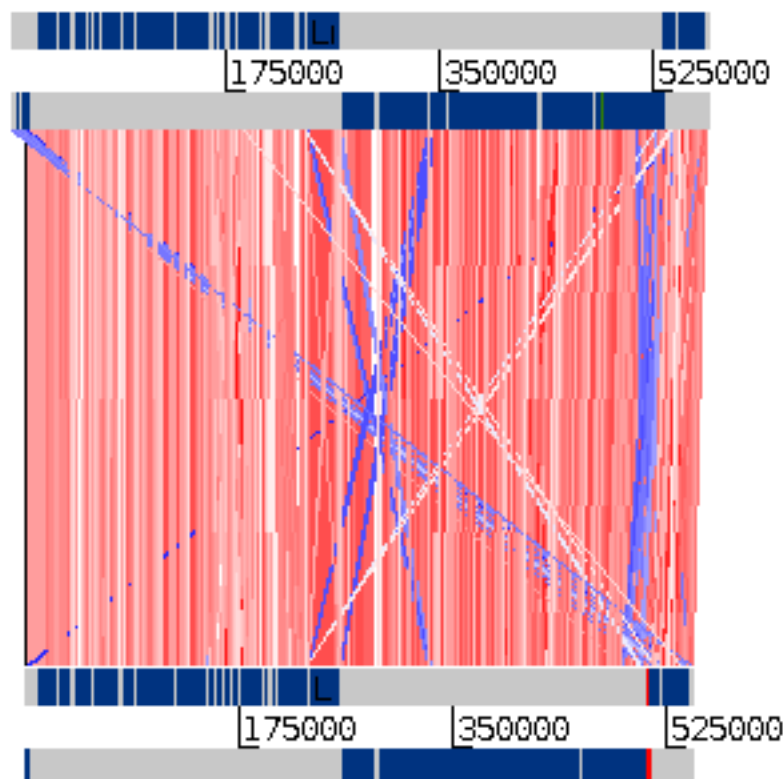

*L. infantum*

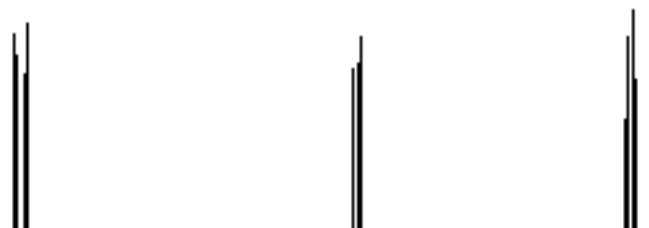

Chromosomes11

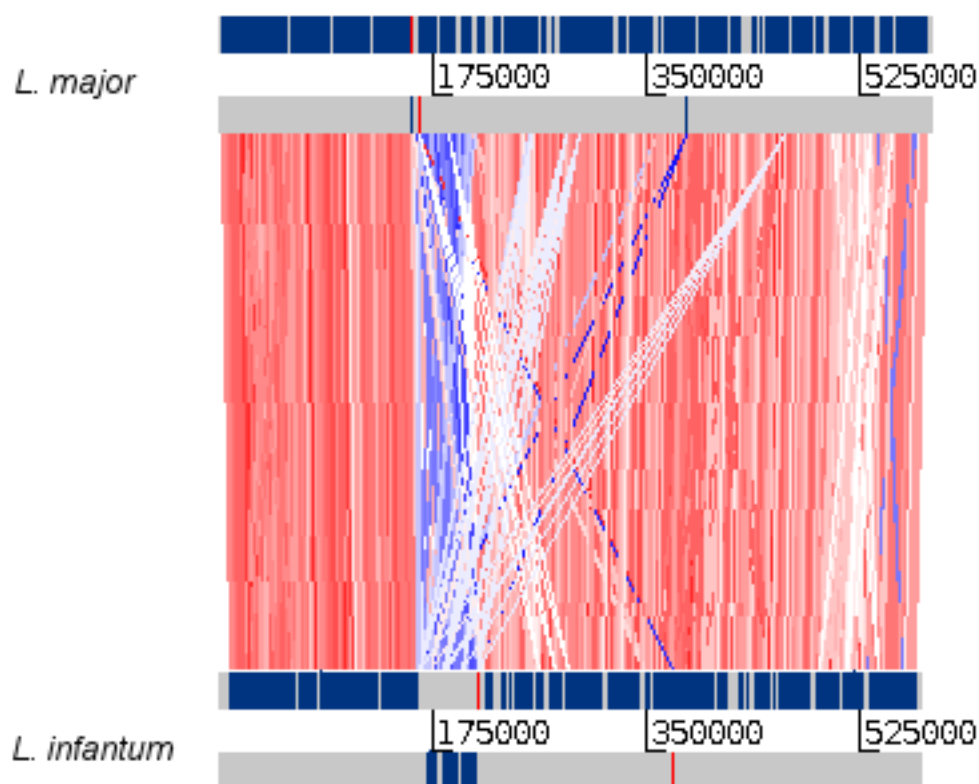

Chromosome12

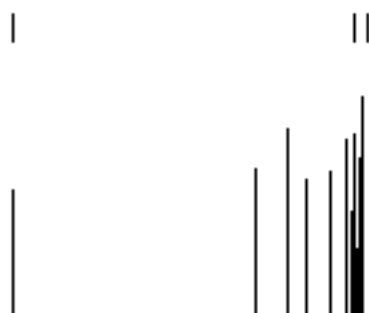

*L. major*

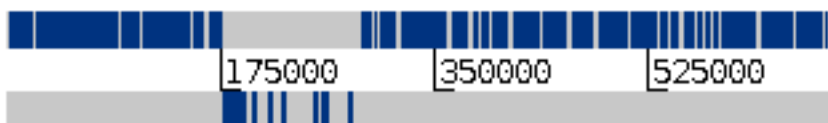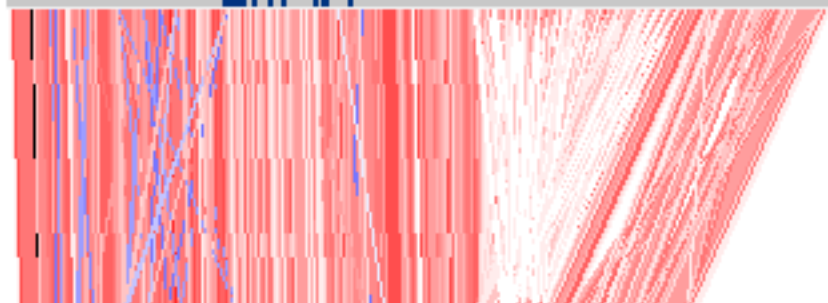

*L. infantum*

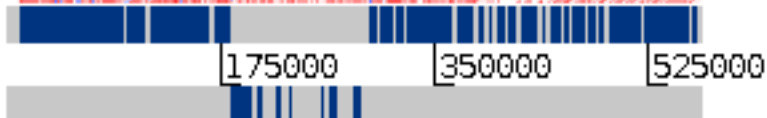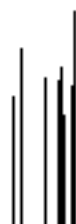

Chromosomes13

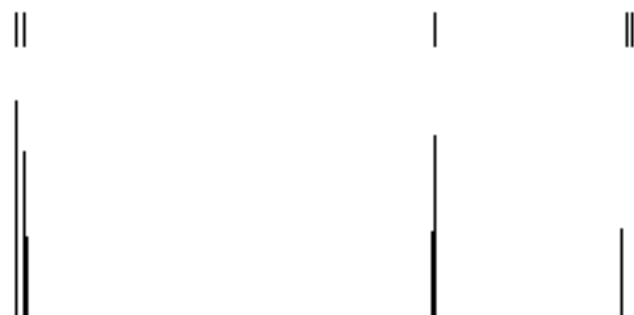

*L. major*

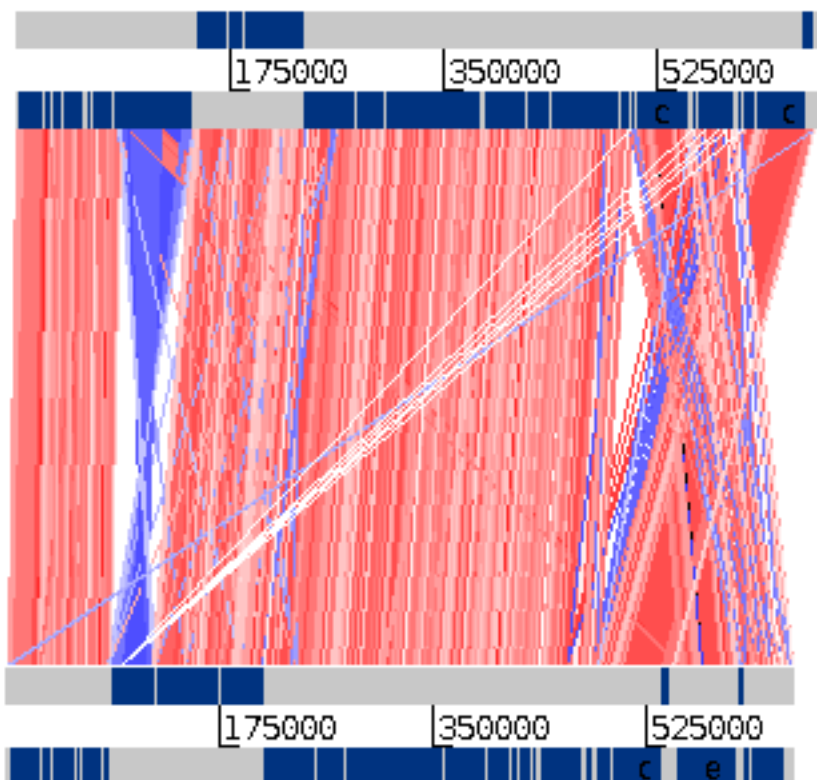

*L. infantum*

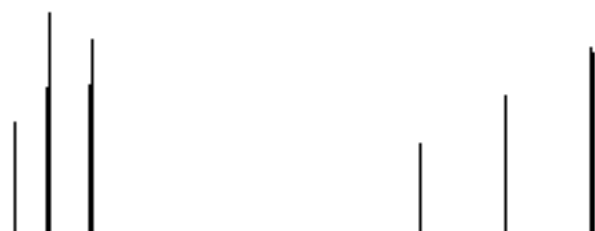

Chromosomes14

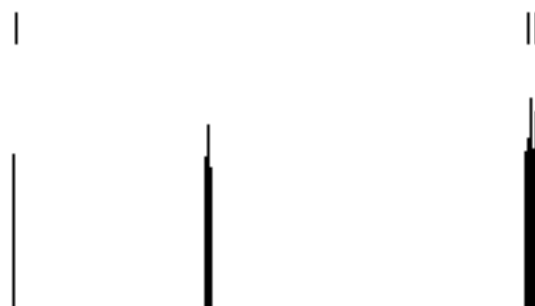

*L. major*

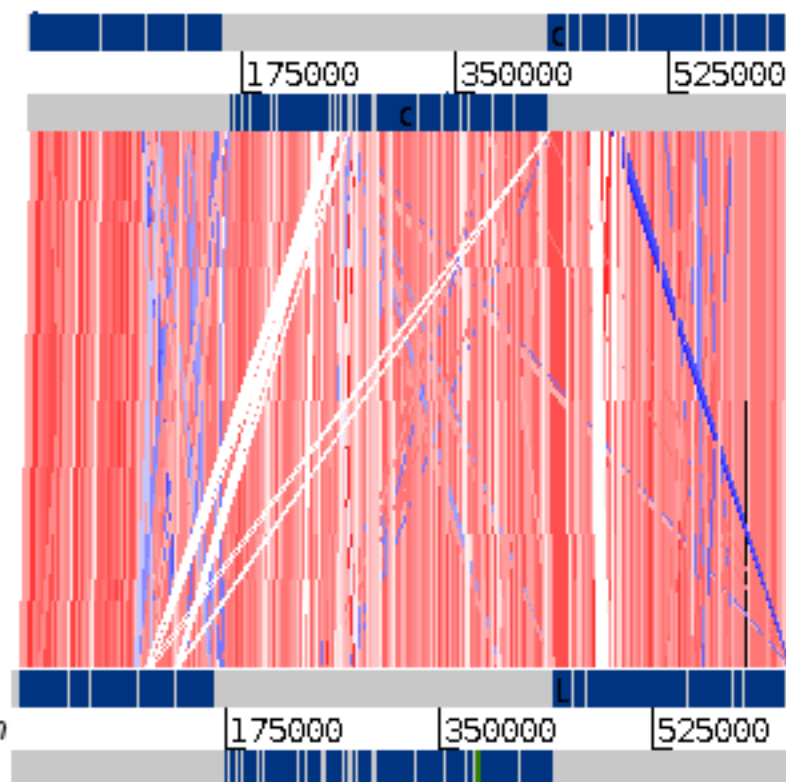

*L. infantum*

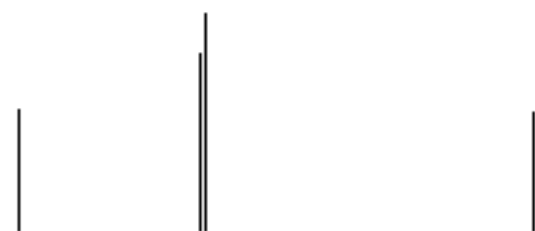

Chromosomes15

*L. major*

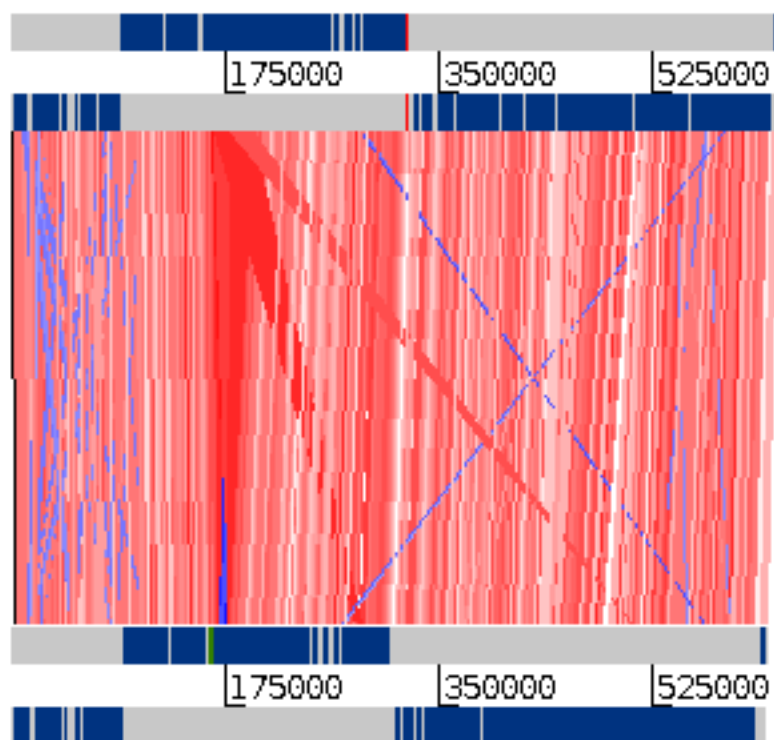

*L. infantum*



Chromosomes16

II

I

*L. major*

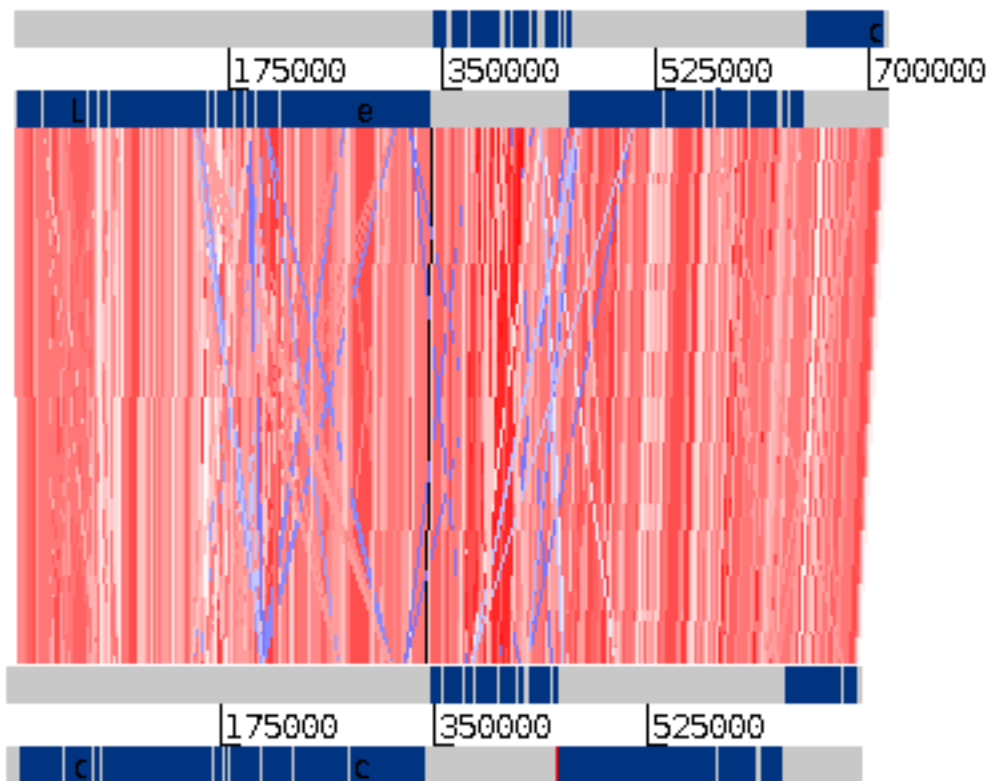

*L. infantum*

Chromosomes17

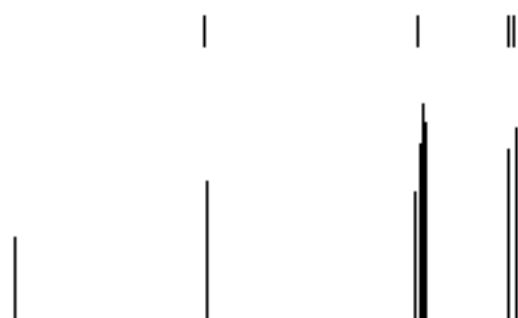

*L. major*

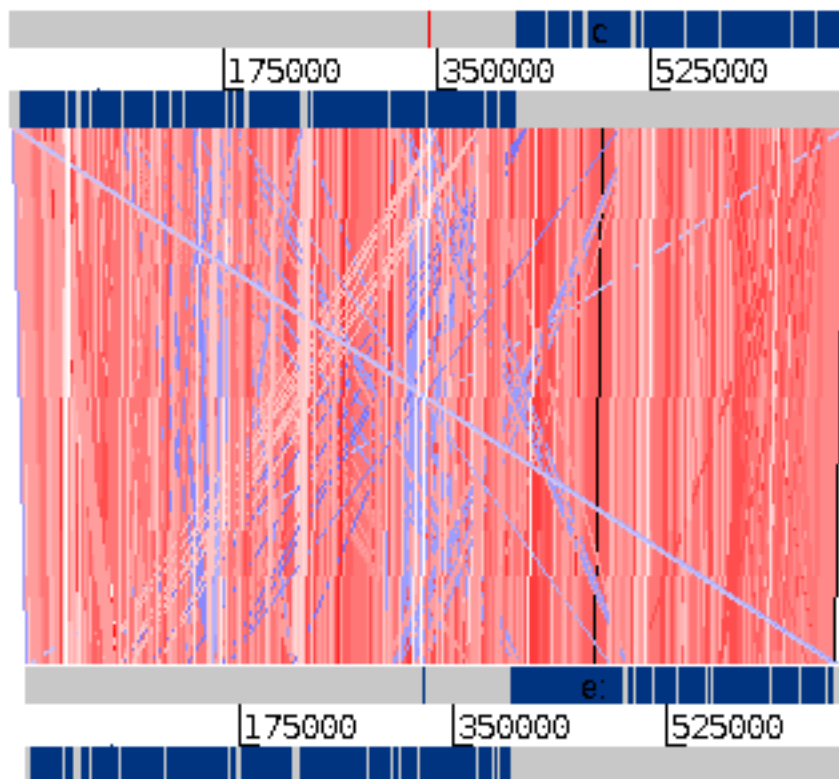

*L. infantum*

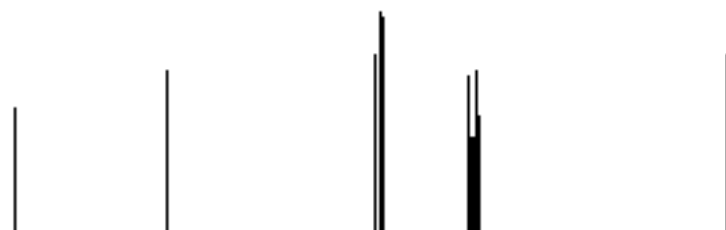

Chromosomes18

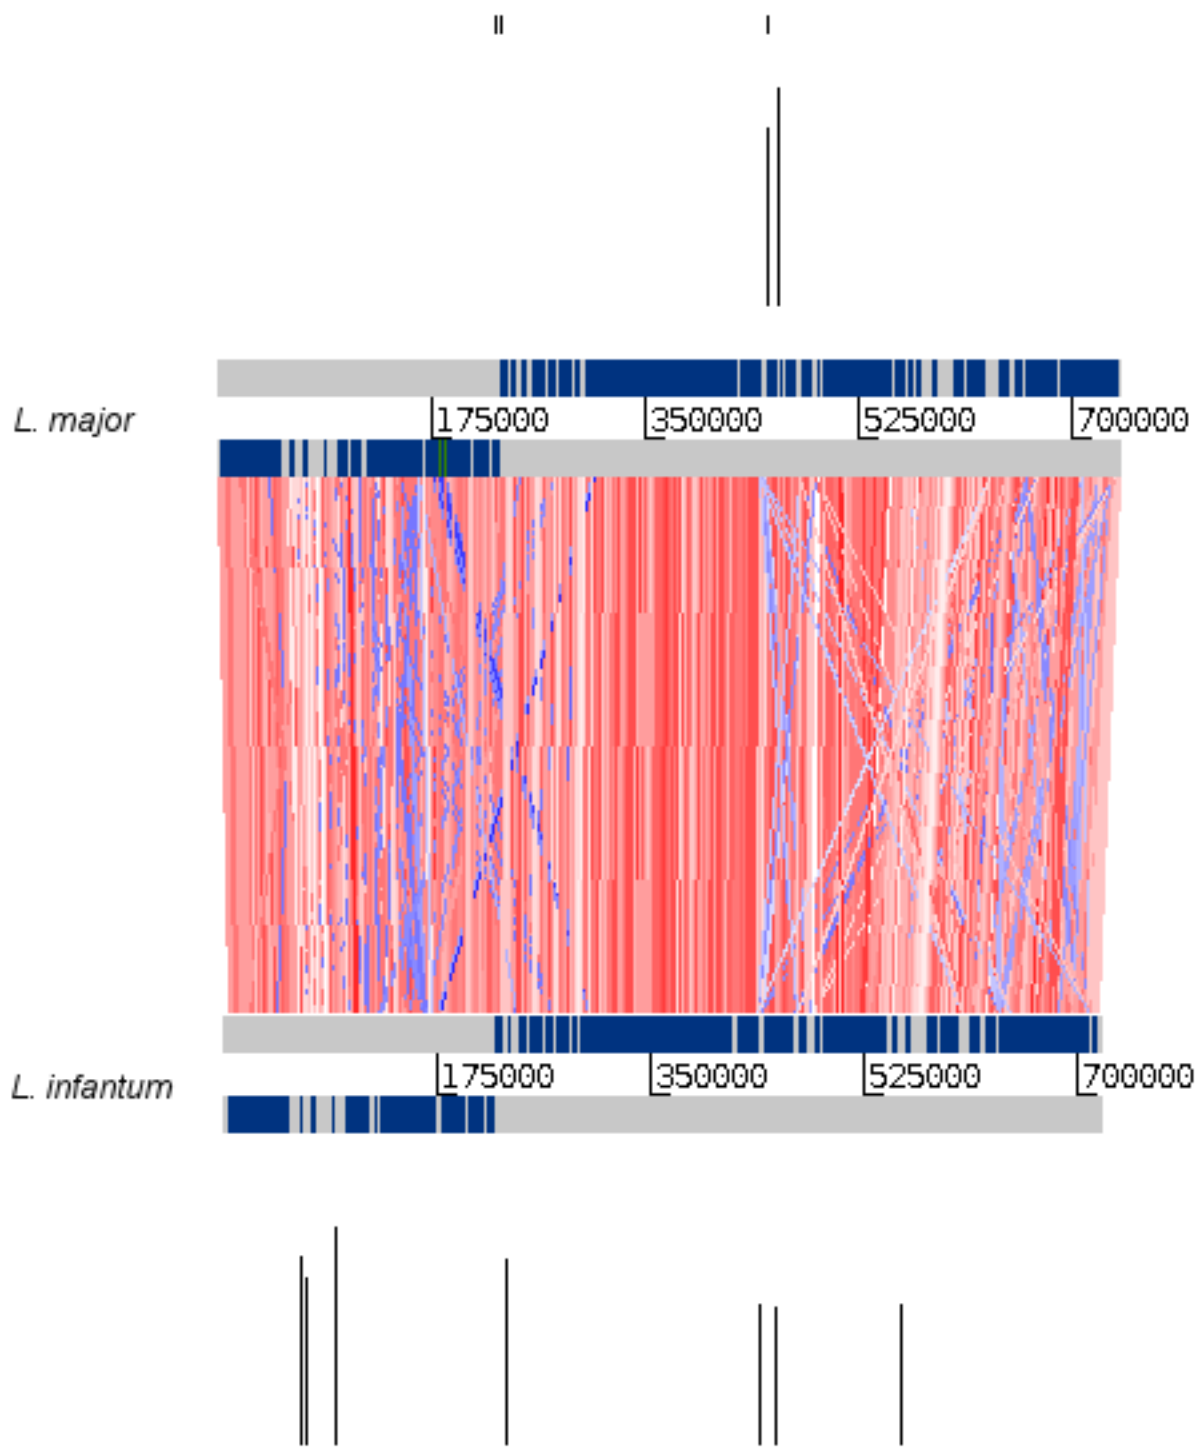

Chromosomes19

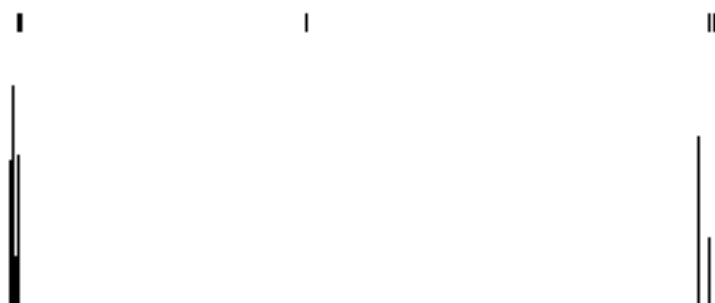

*L. major*

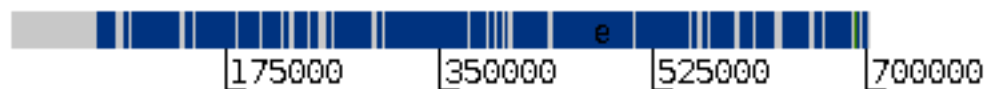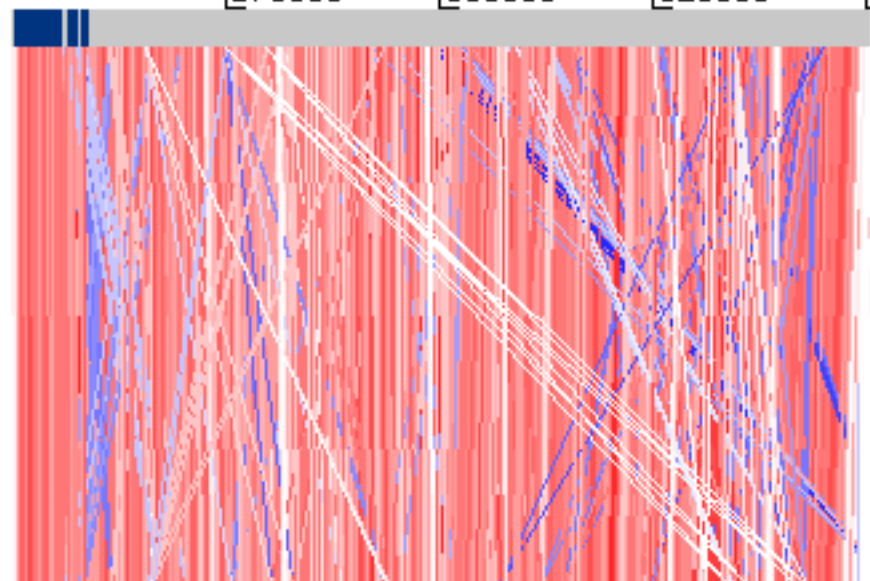

*L. infantum*

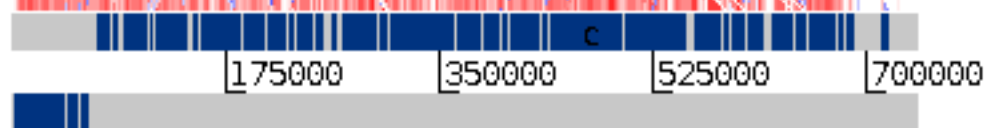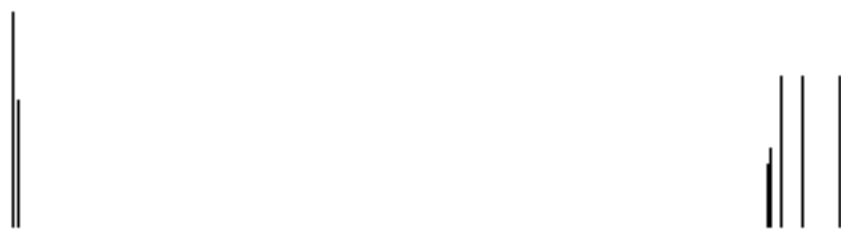

Chromosomes20

||

|

|

|

*L. major*

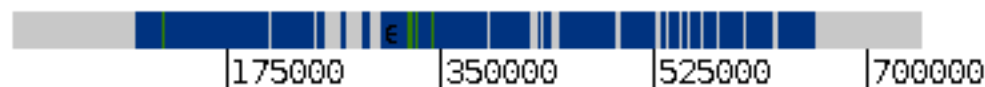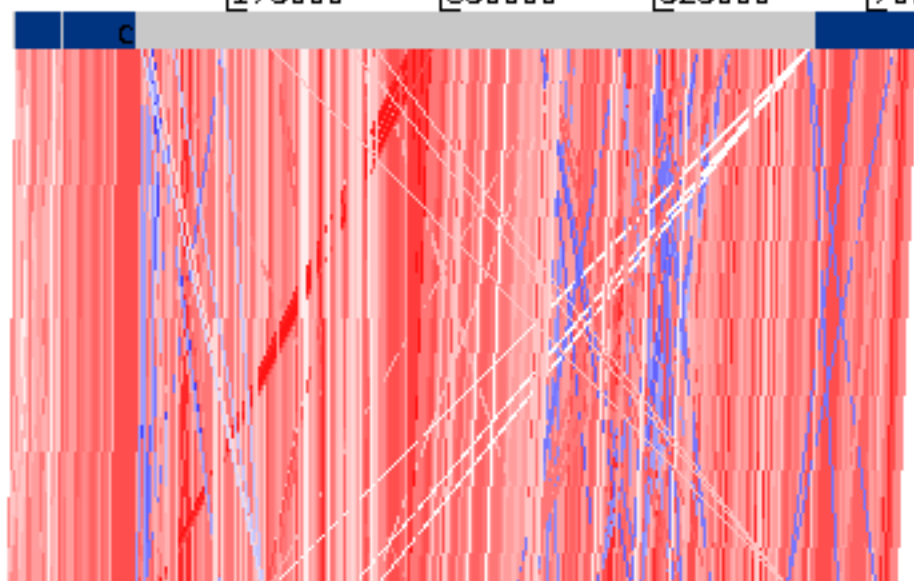

*L. infantum*

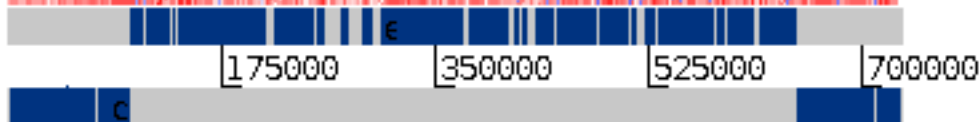

|

|

Chromosomes21

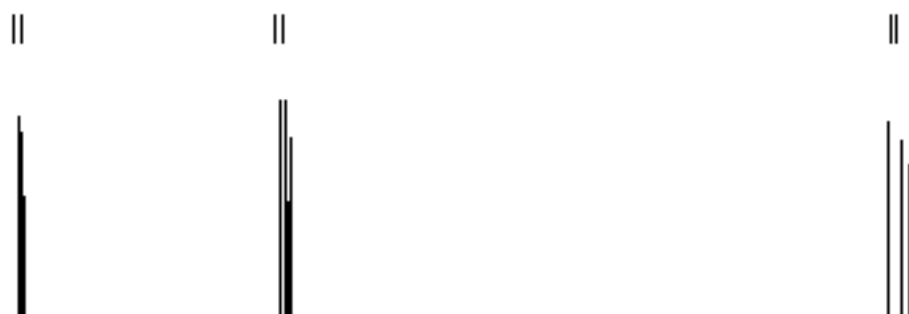

*L. major*

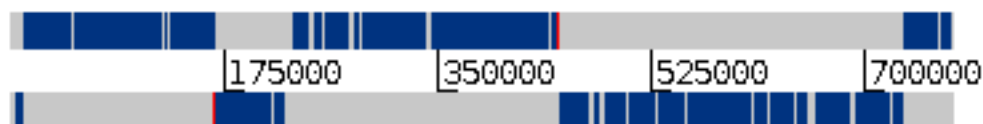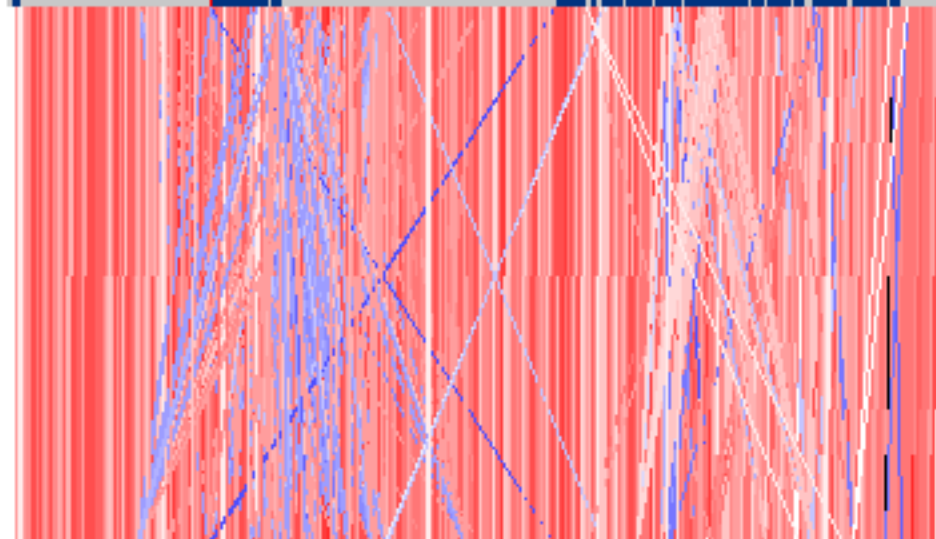

*L. infantum*

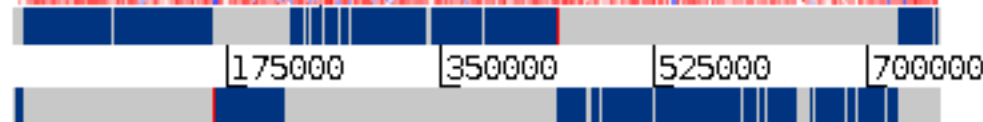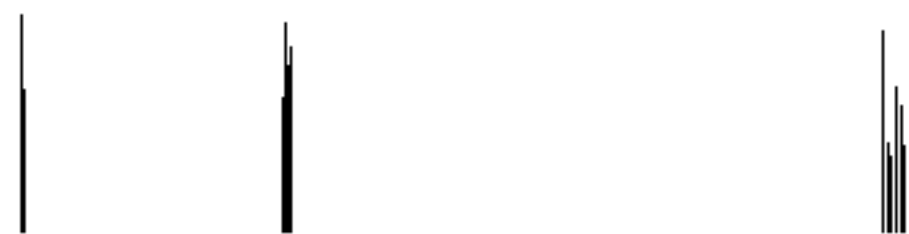

Chromosomes22

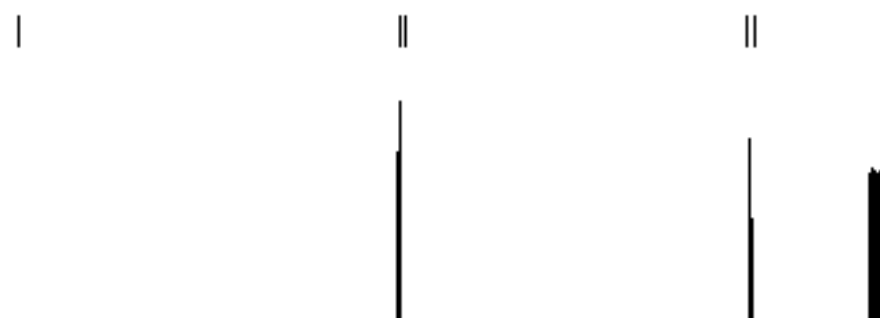

*L. major*

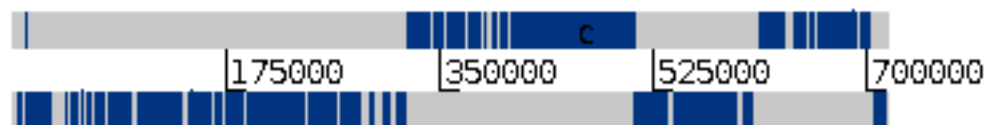

*L. infantum*

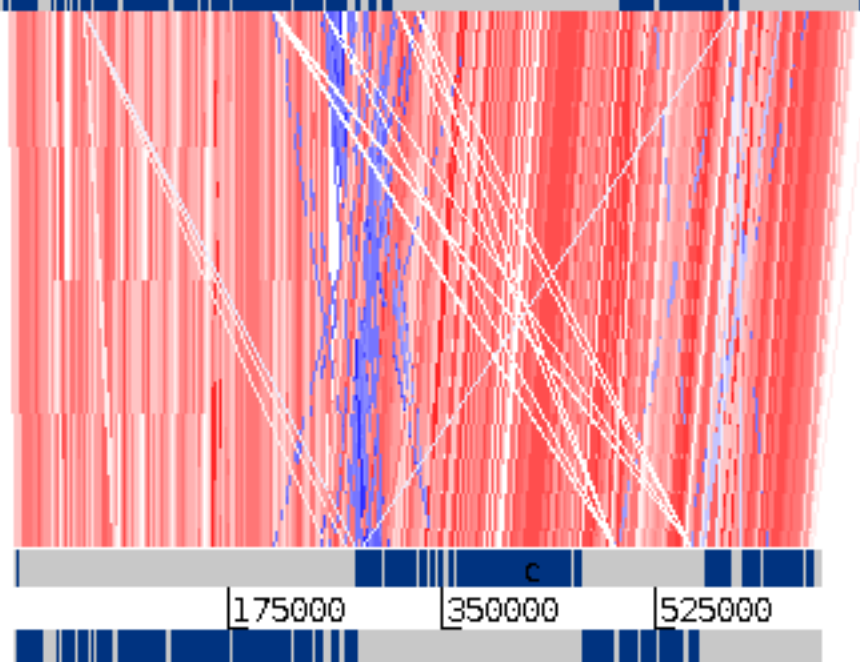

Chromosomes23

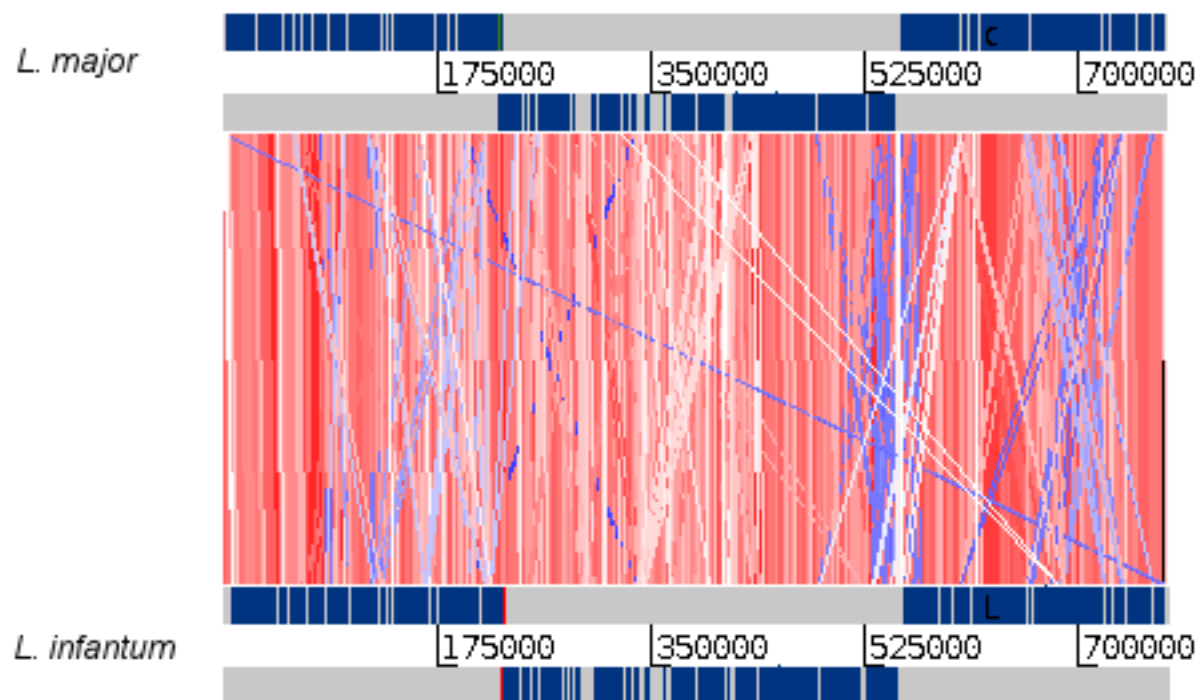



Chromosomes24

*L. major*

*L. infantum*

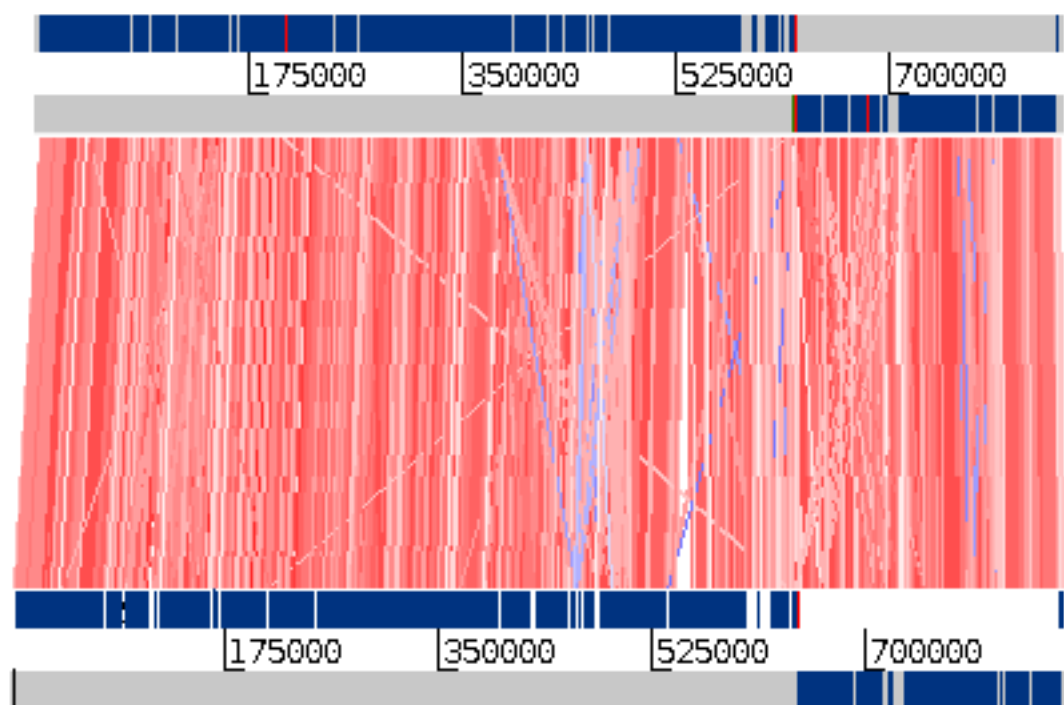

Chromosomes25

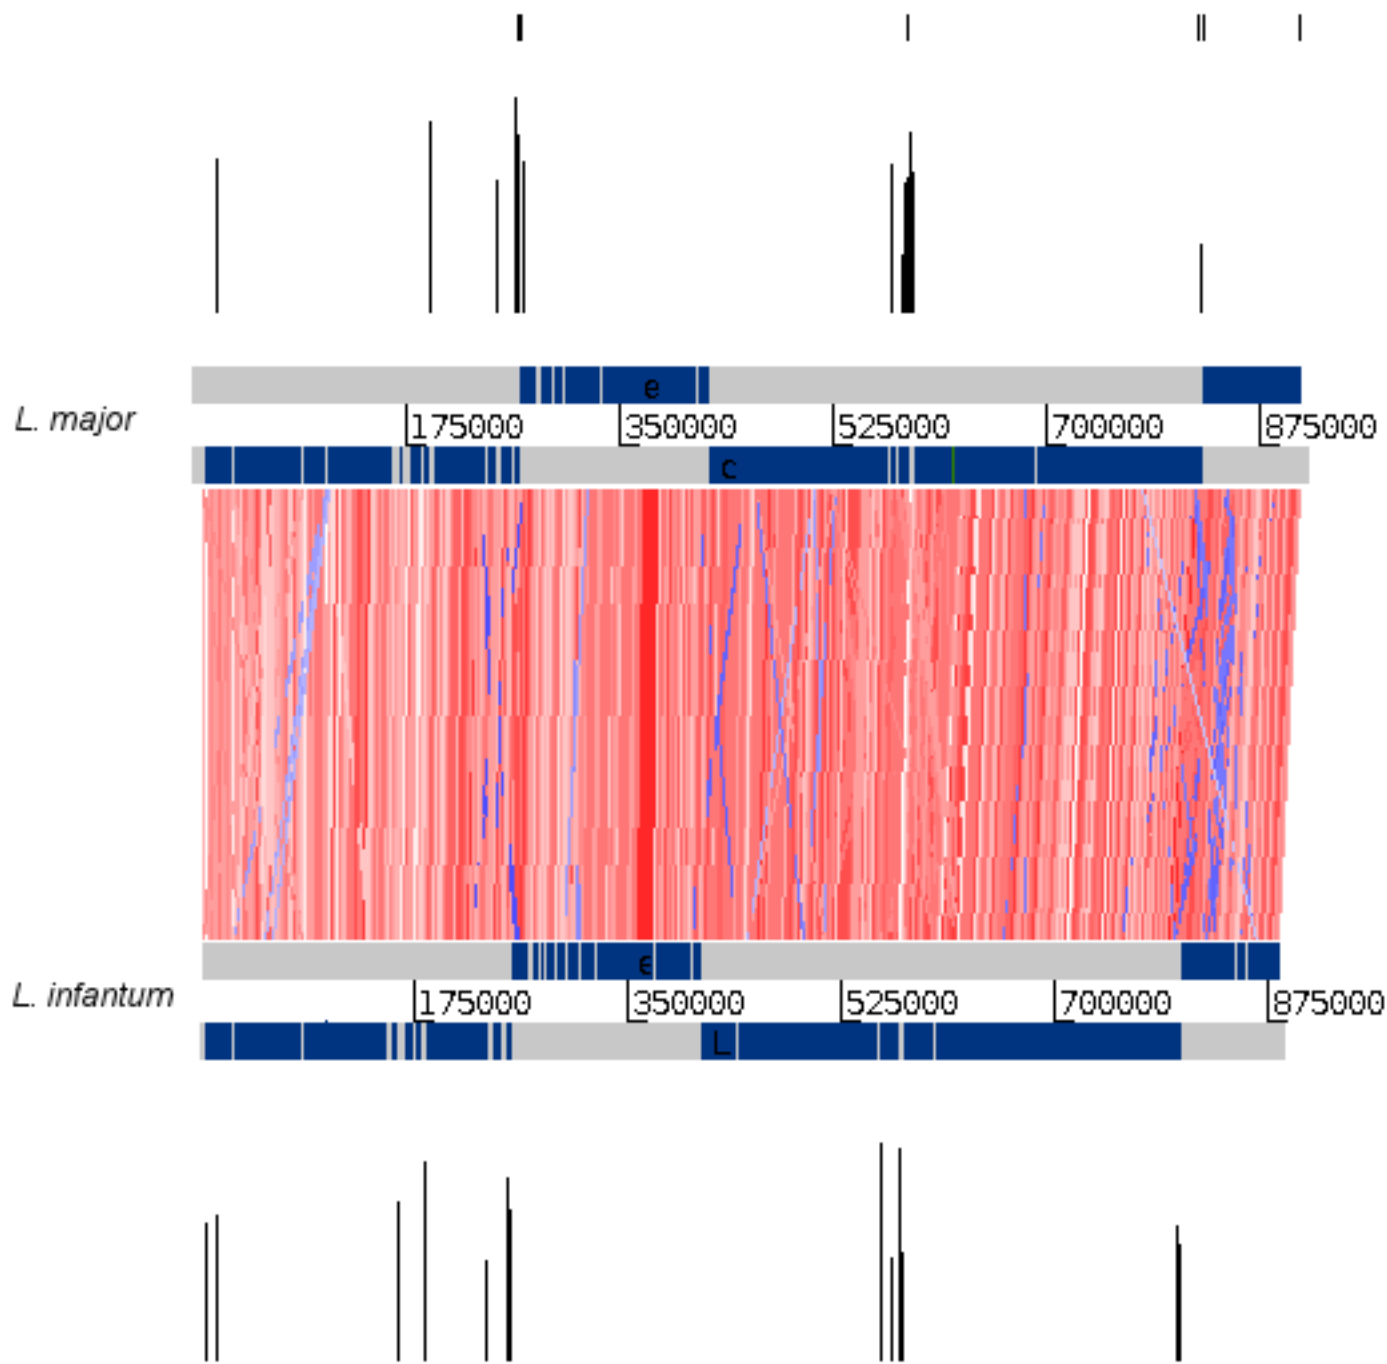

Chromosomes26

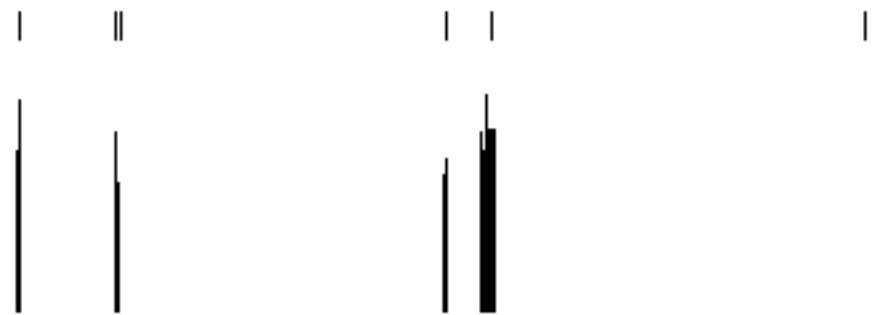

*L. major*

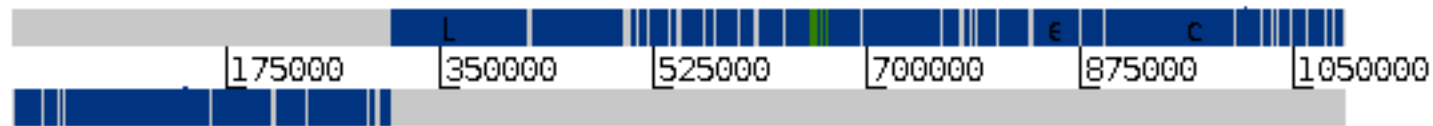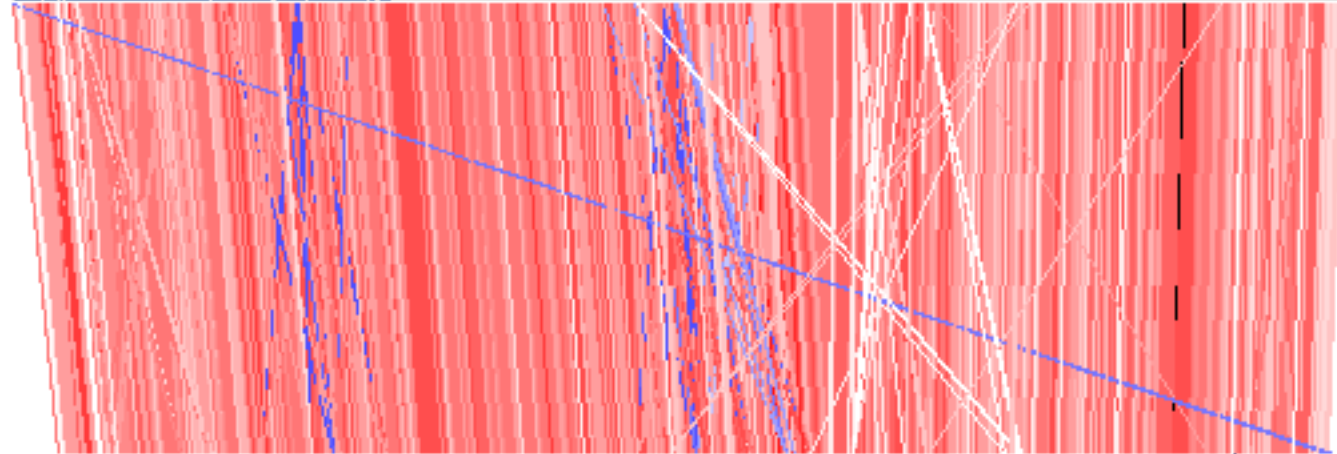

*L. infantum*

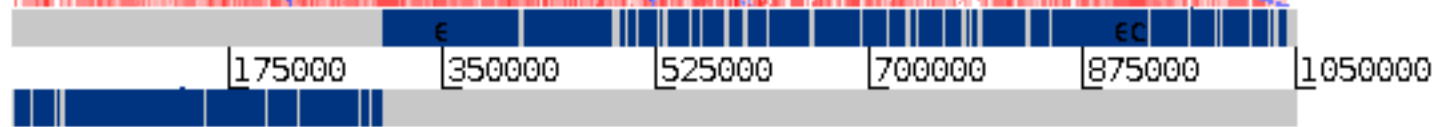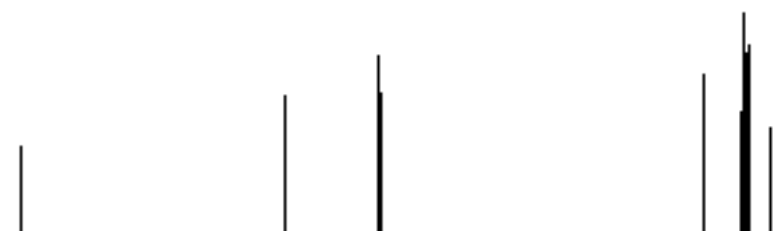

Chromosomes27

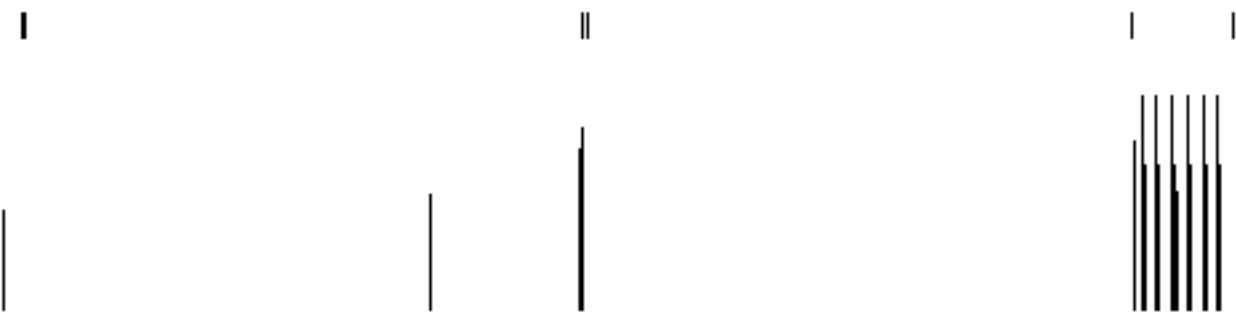

*L. major*

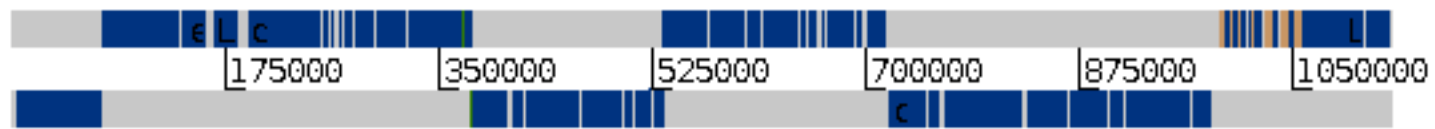

*L. infantum*

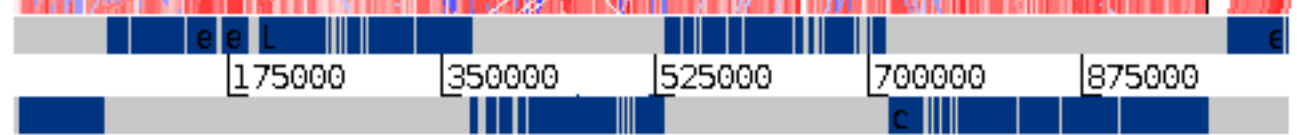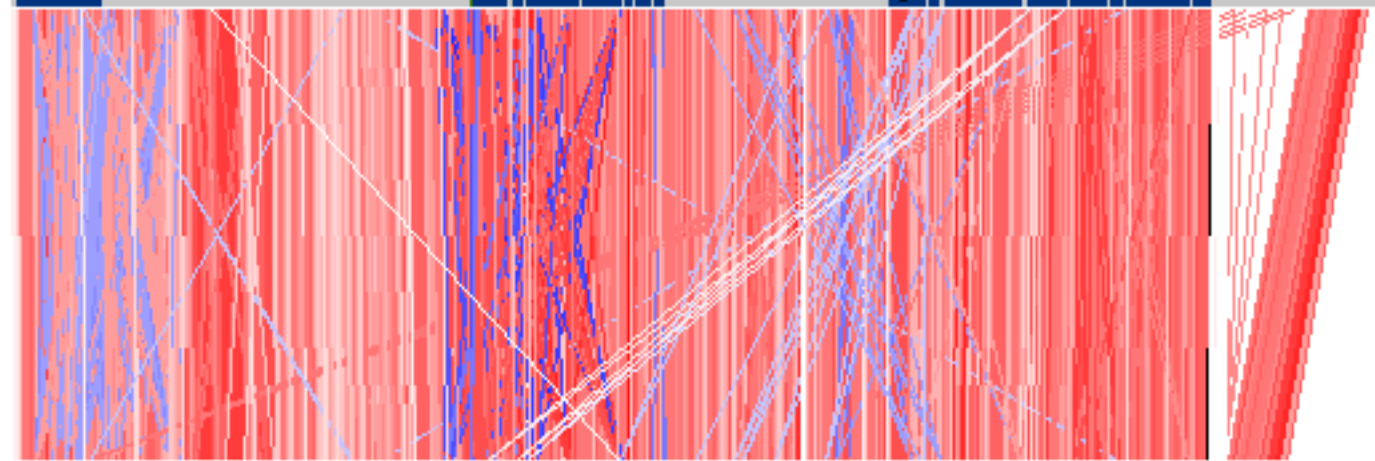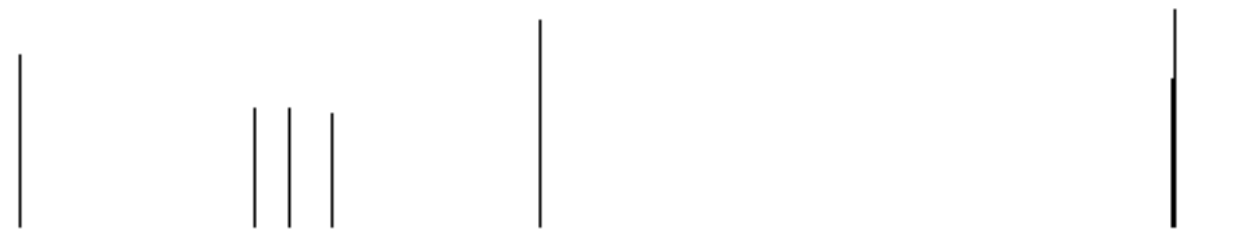

Chromosomes28

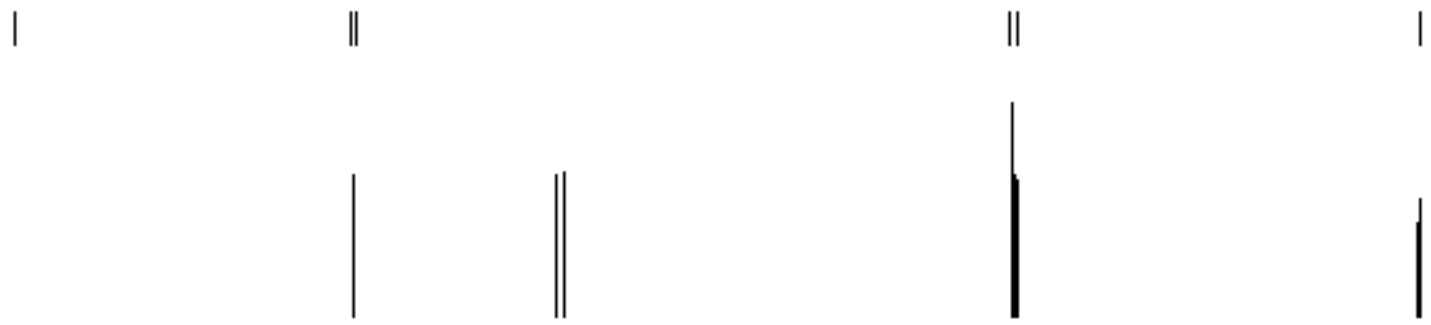

*L. major*

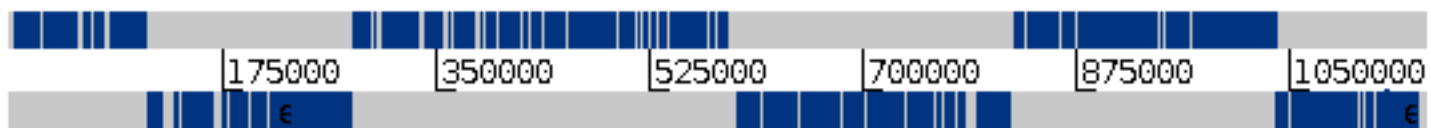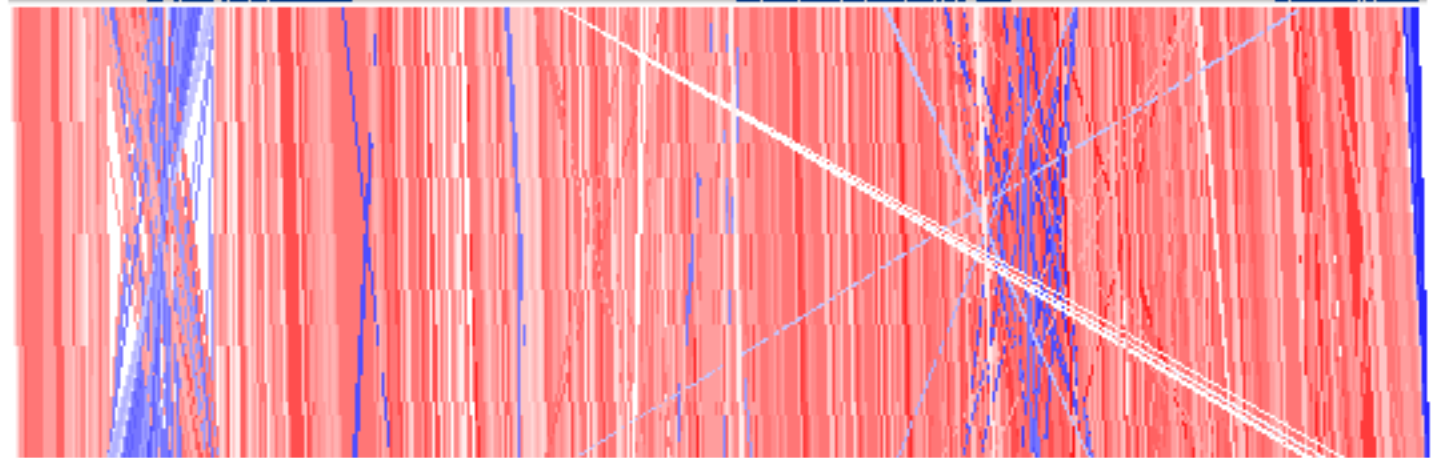

*L. infantum*

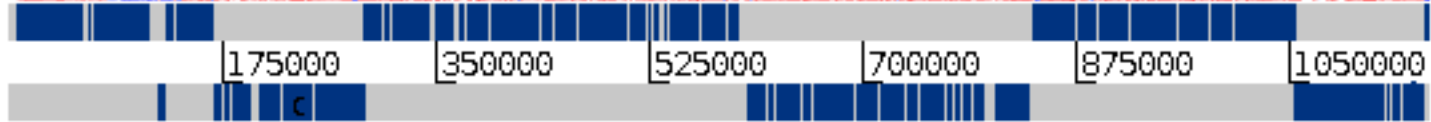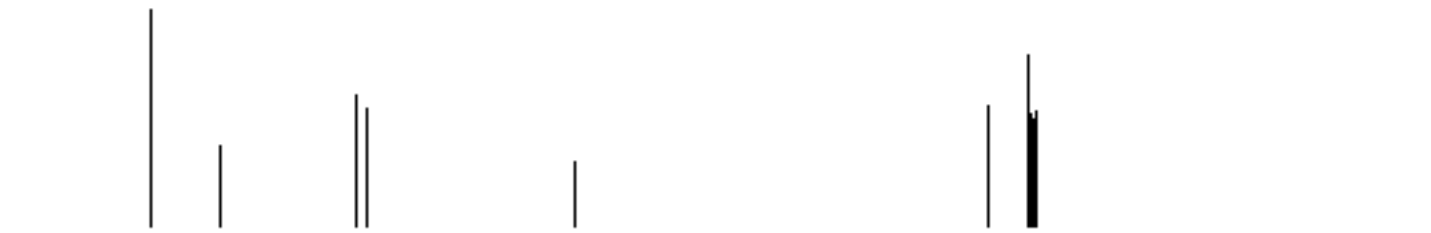

Chromosomes29

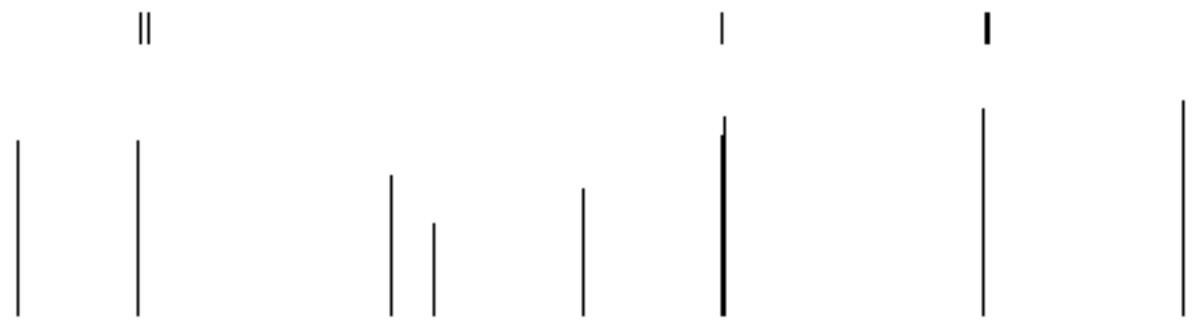

*L. major*

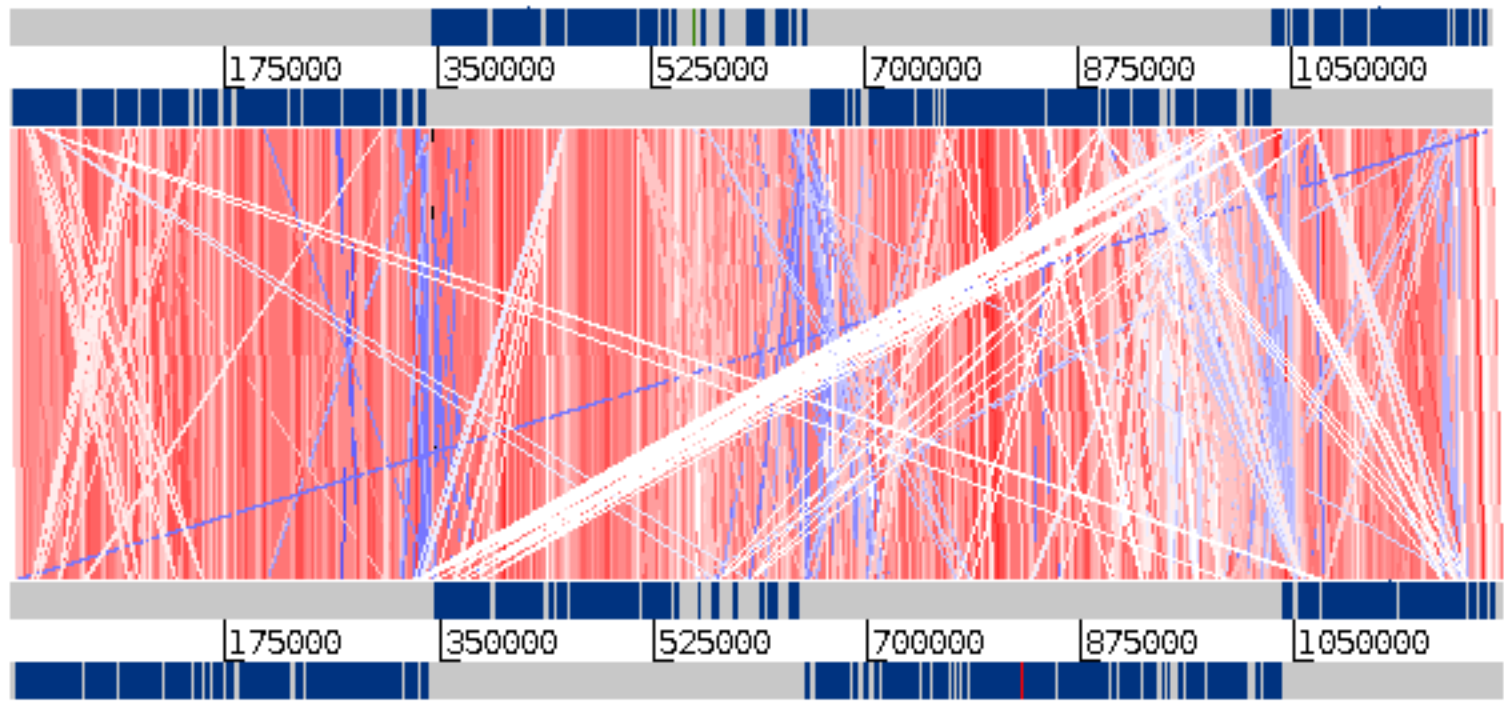

*L. infantum*

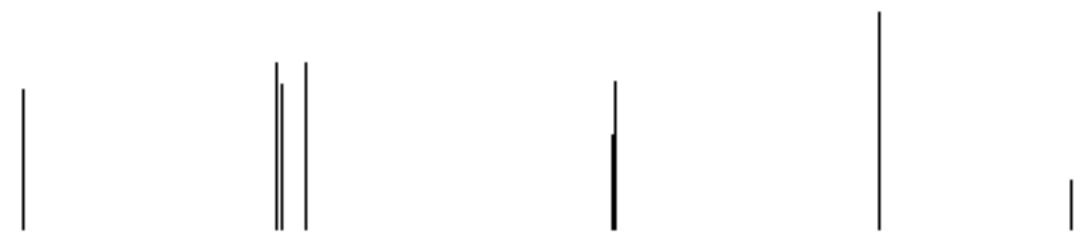

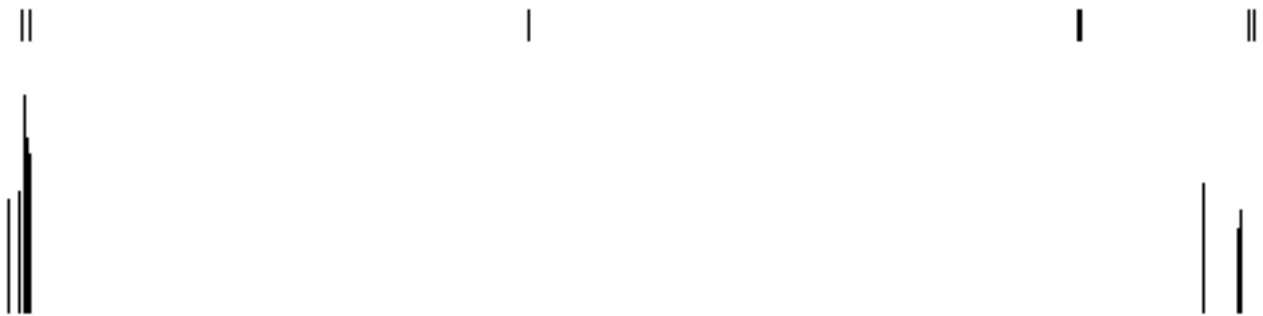

*L. major*

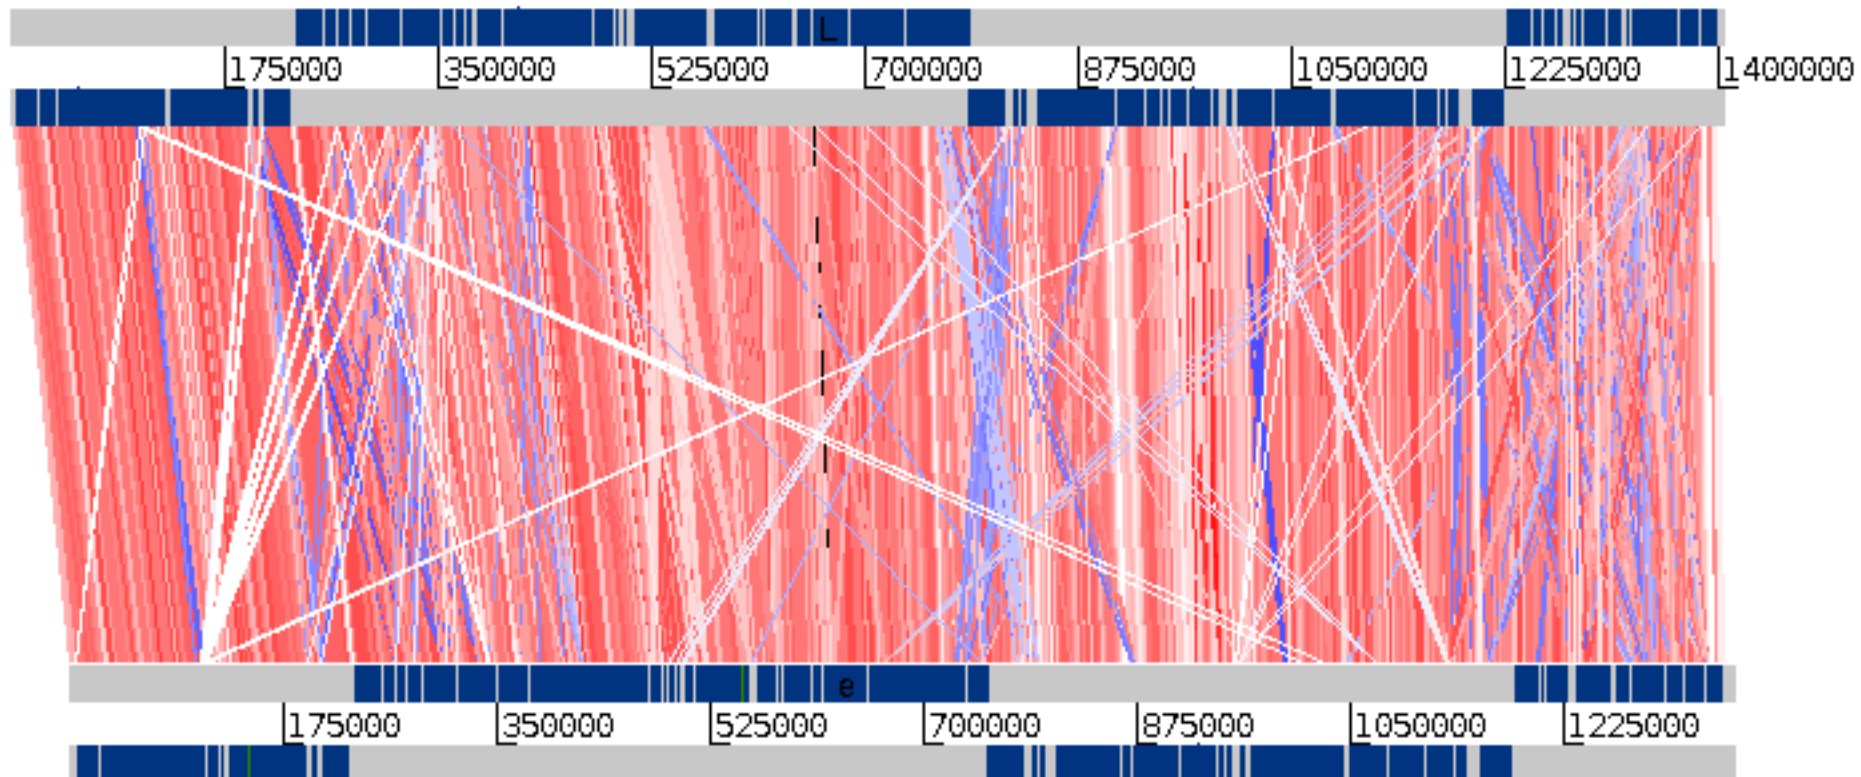

*L. infantum*

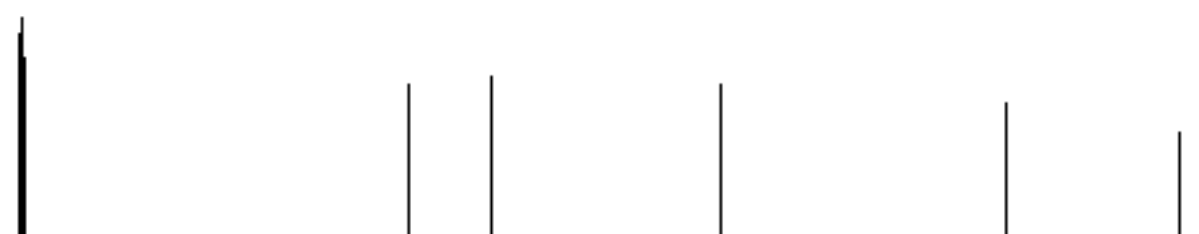

Chromosomes31

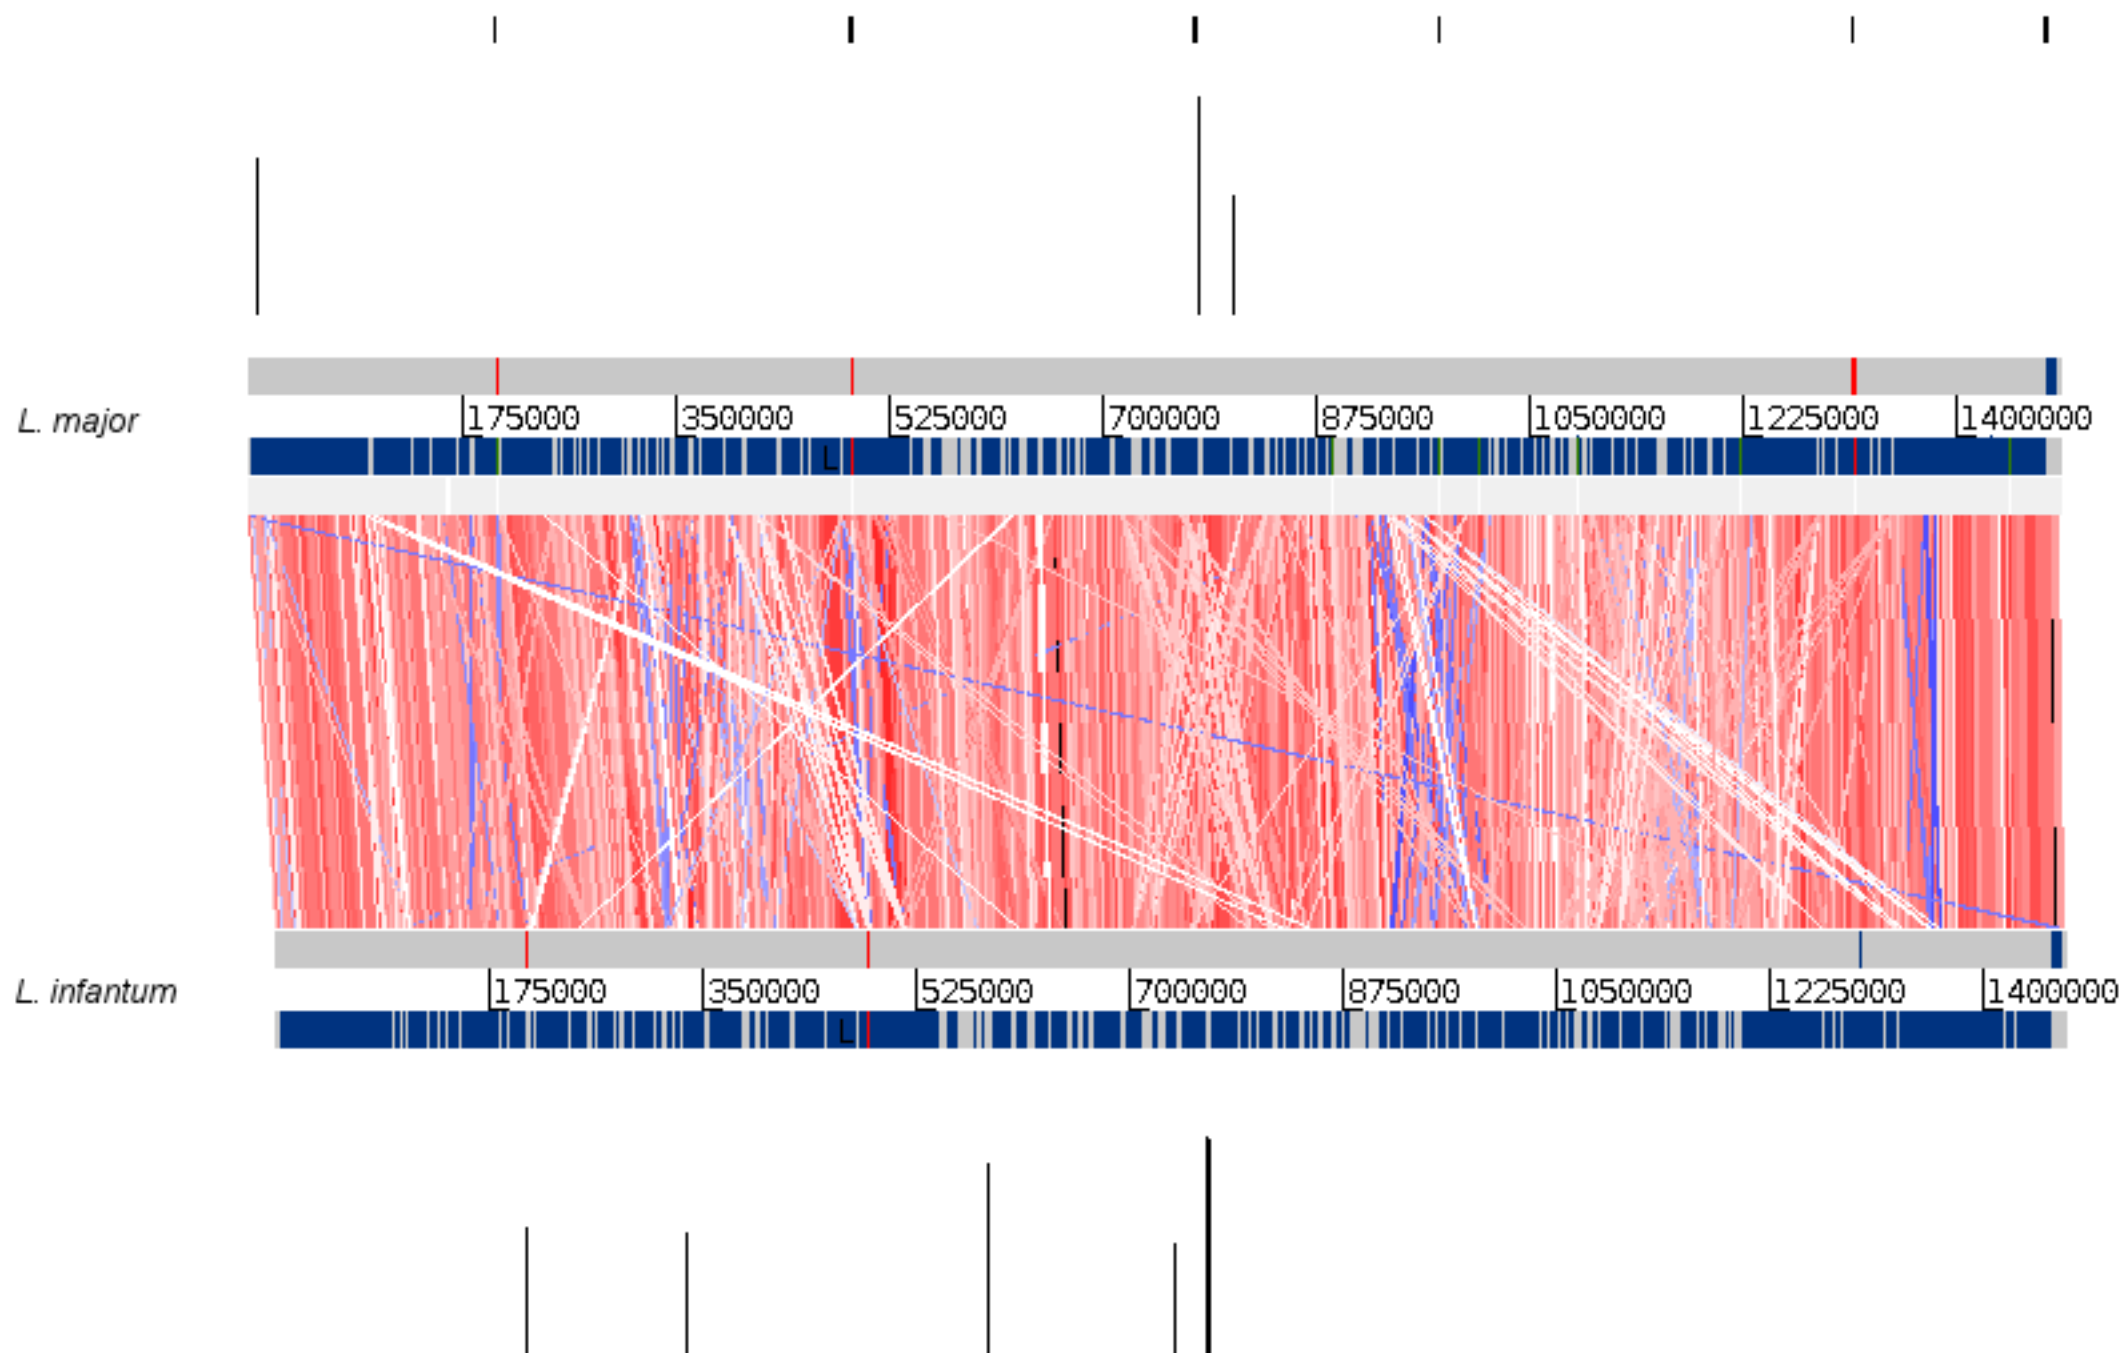



Chromosomes32

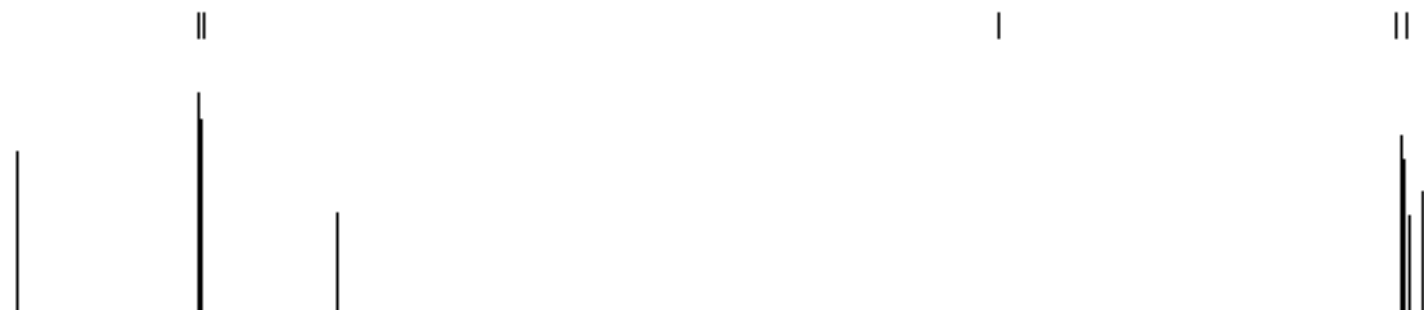

*L. major*

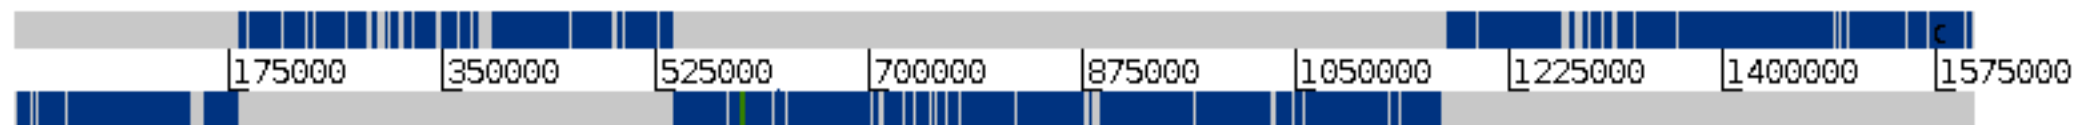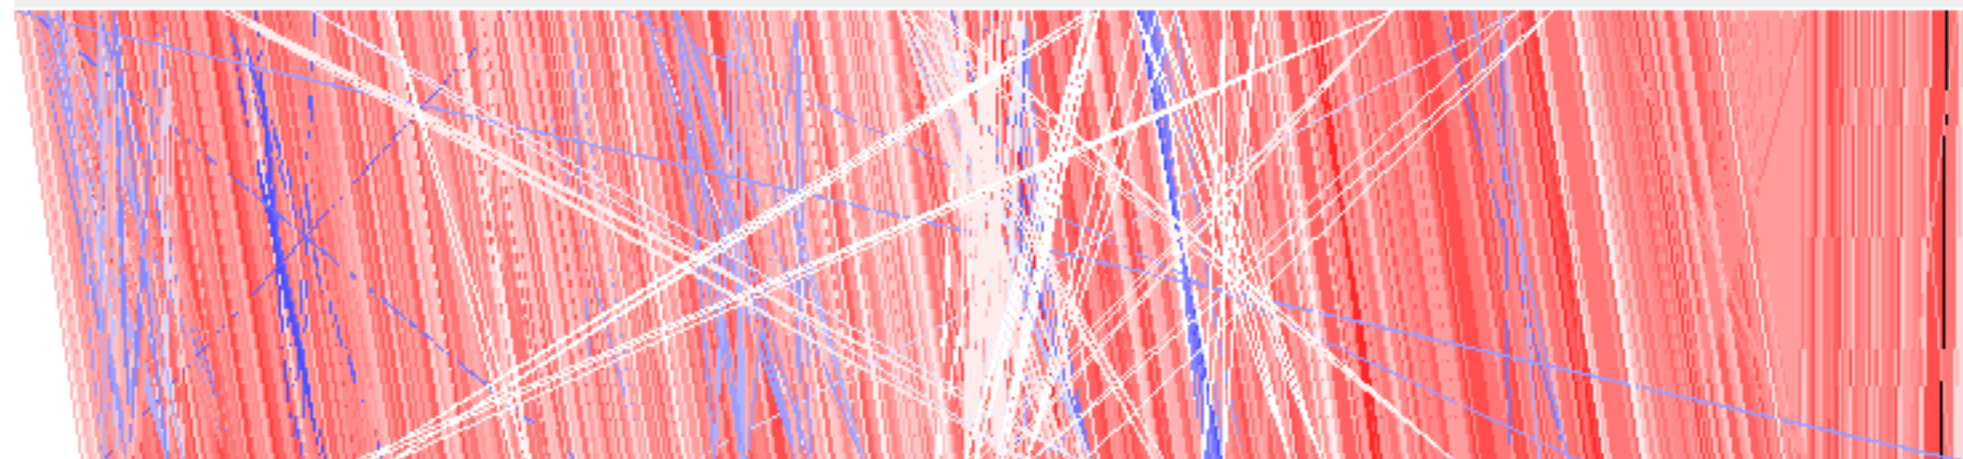

*L. infantum*

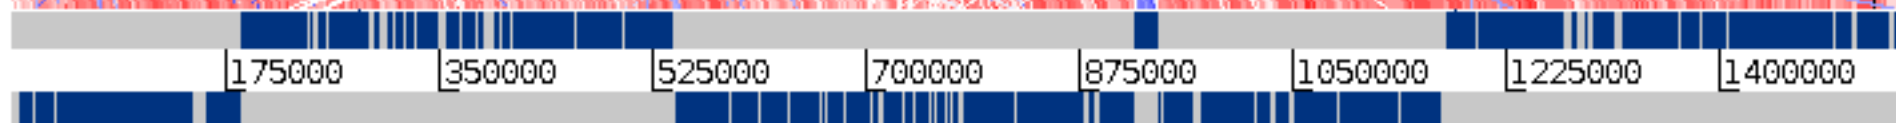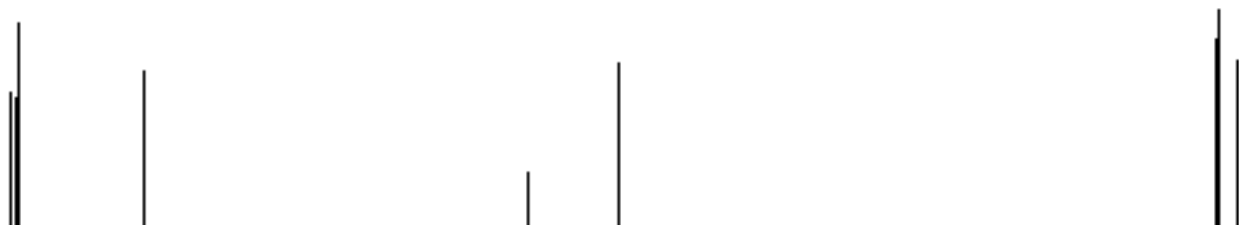

Chromosomes33

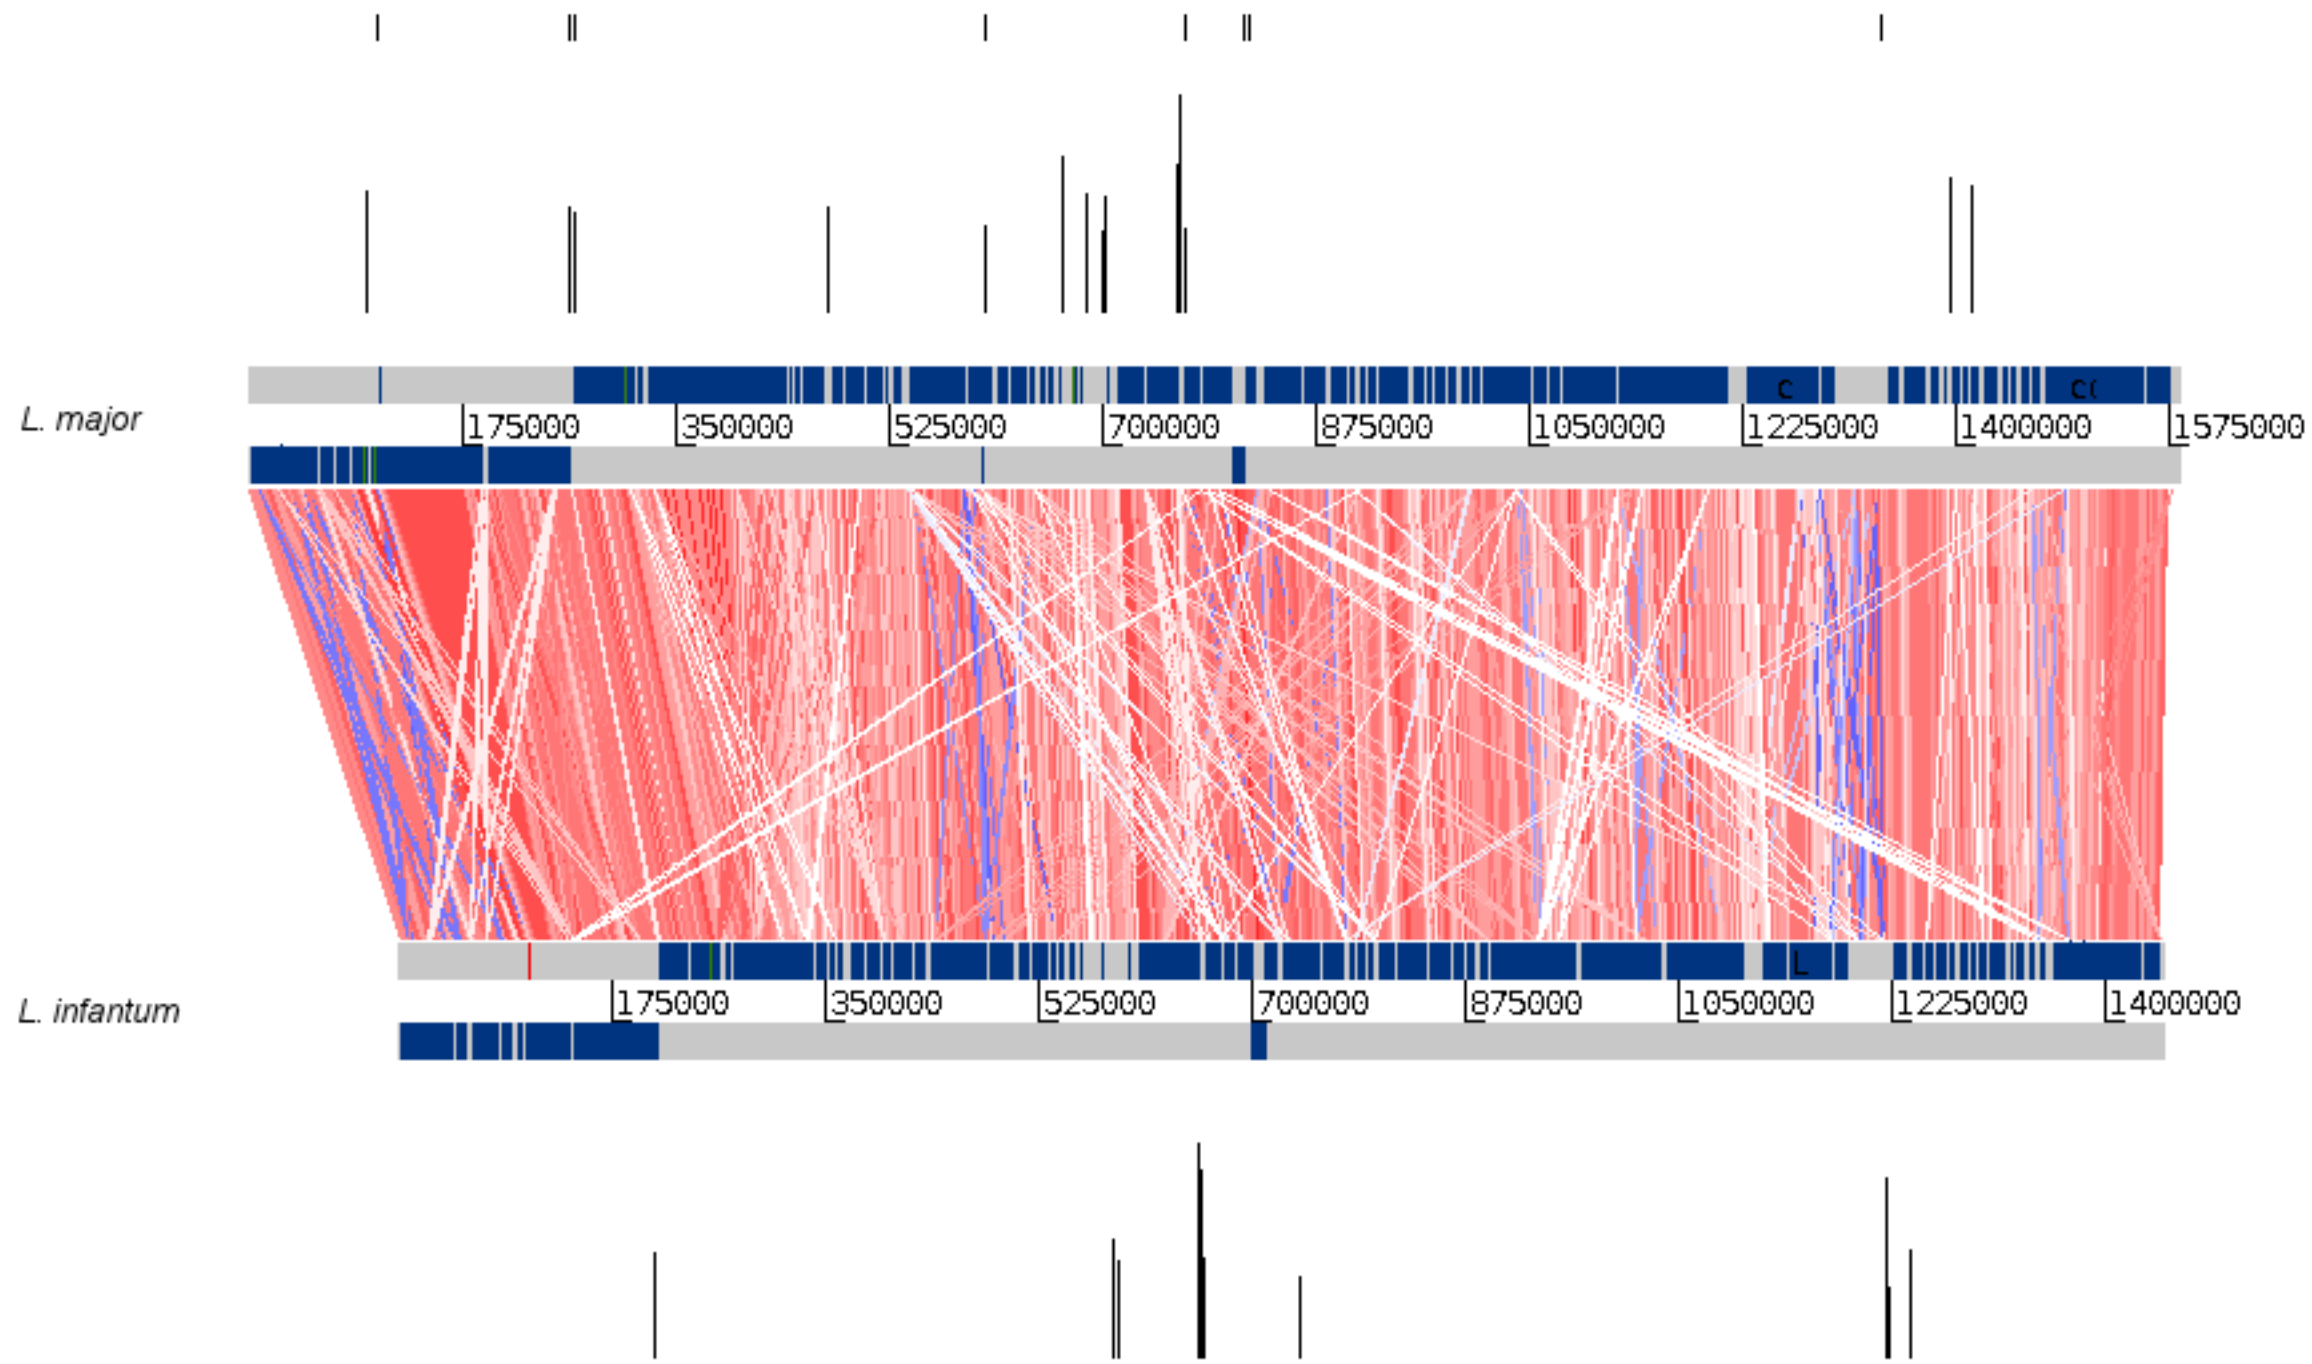

## Chromosomes34

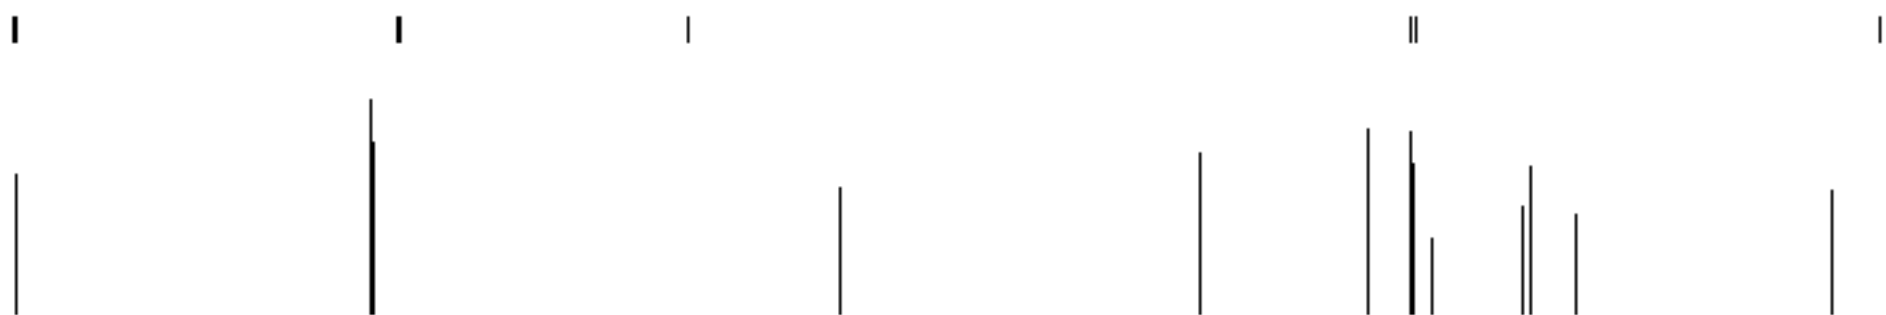*L. major*

175000 350000 525000 700000 875000 1050000 1225000 1400000 1575000 1750000

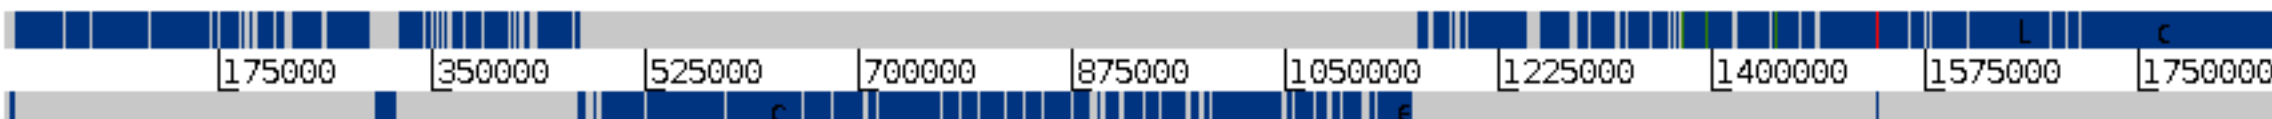*L. infantum*

175000 350000 525000 700000 875000 1050000 1225000 1400000 1575000

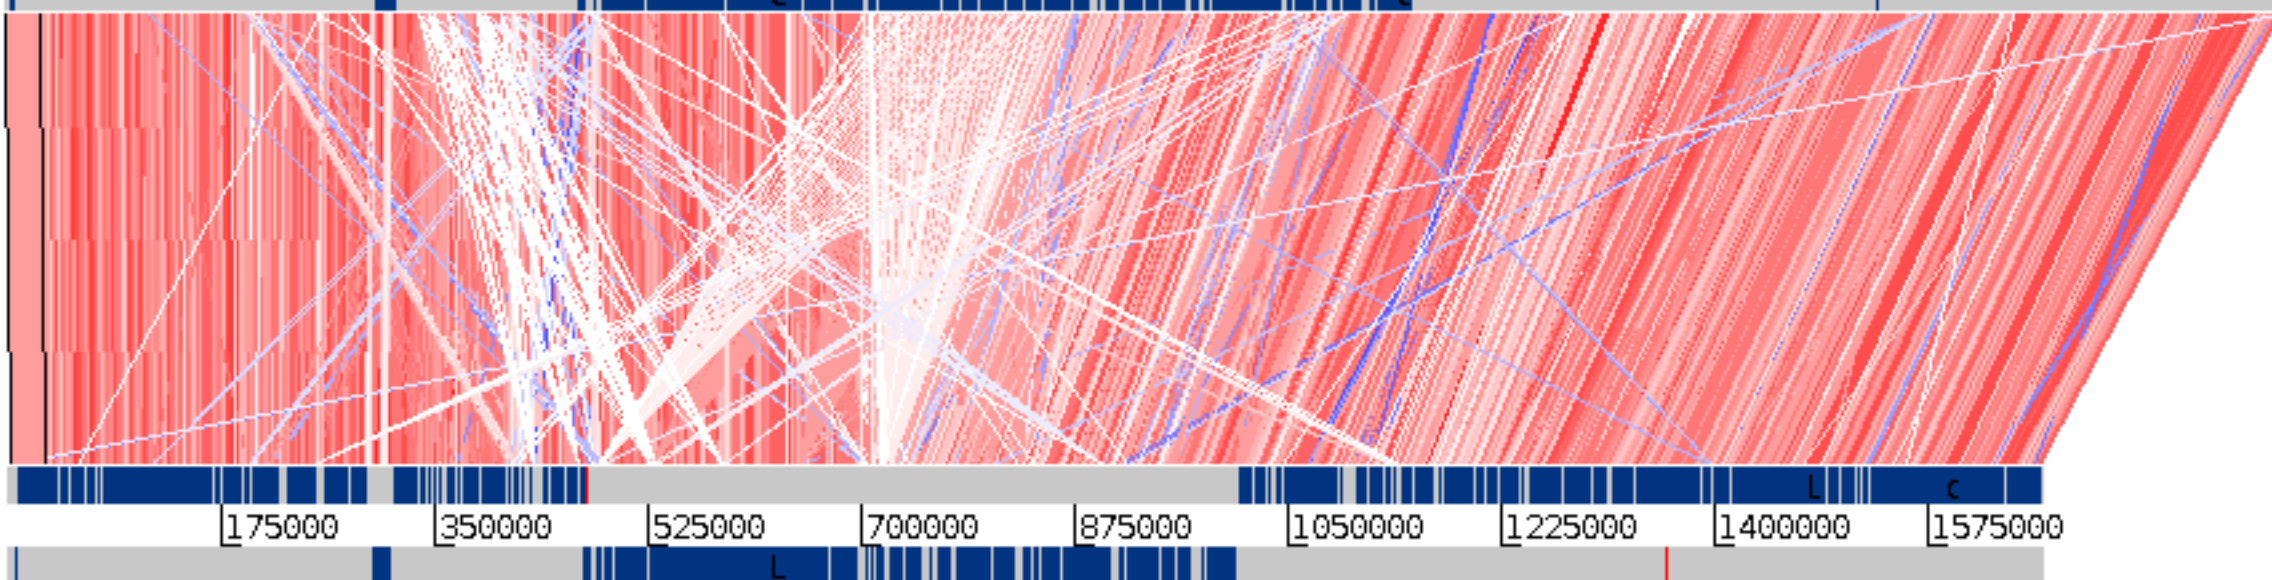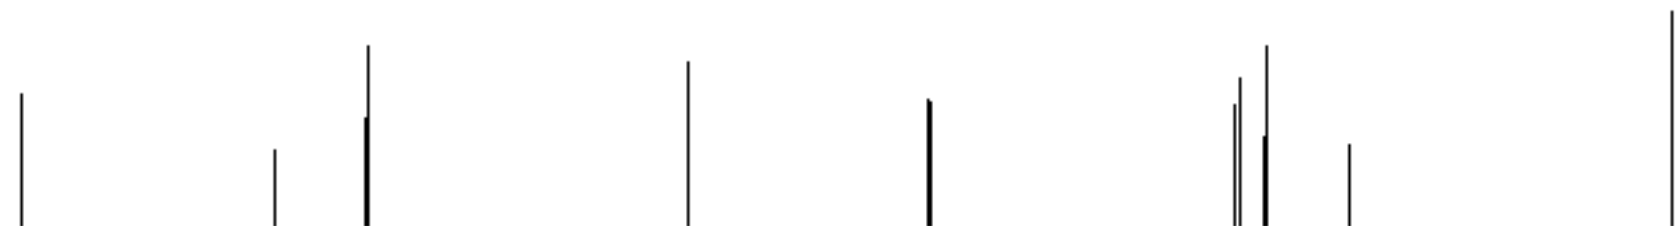

*L. major**L. infantum*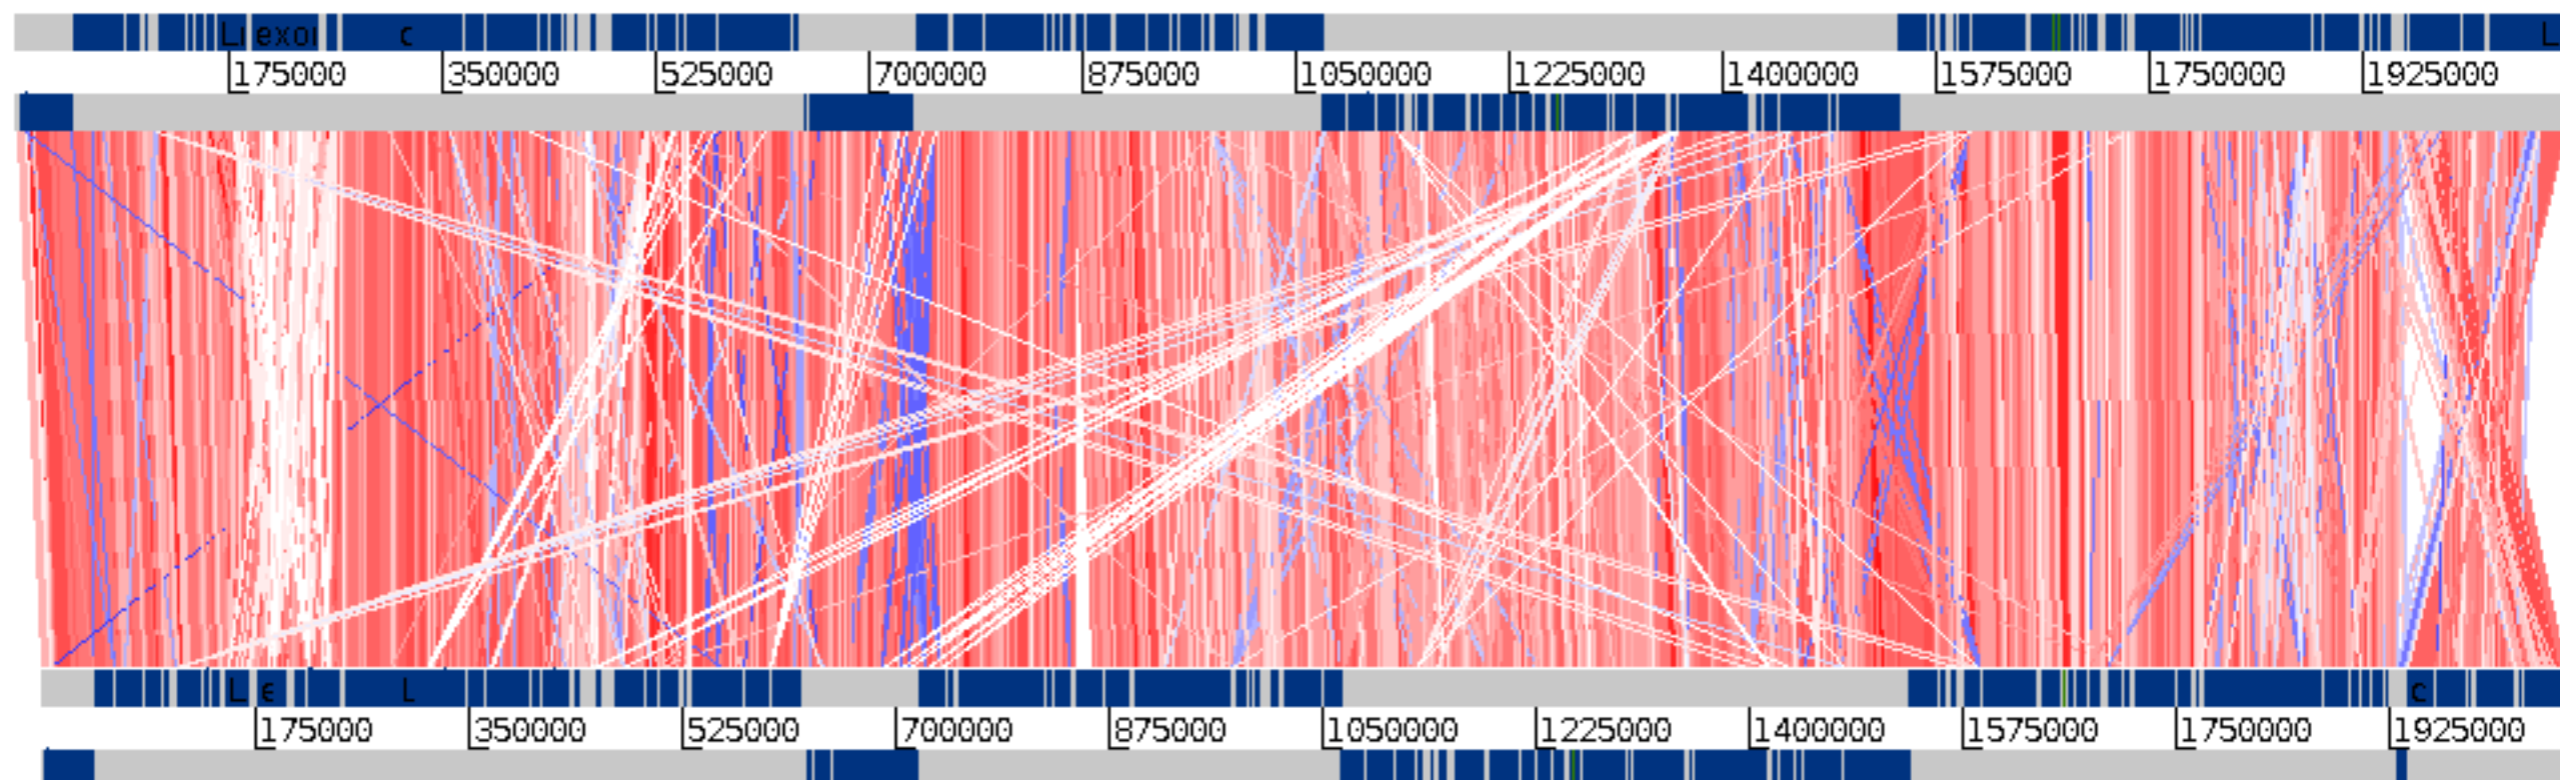

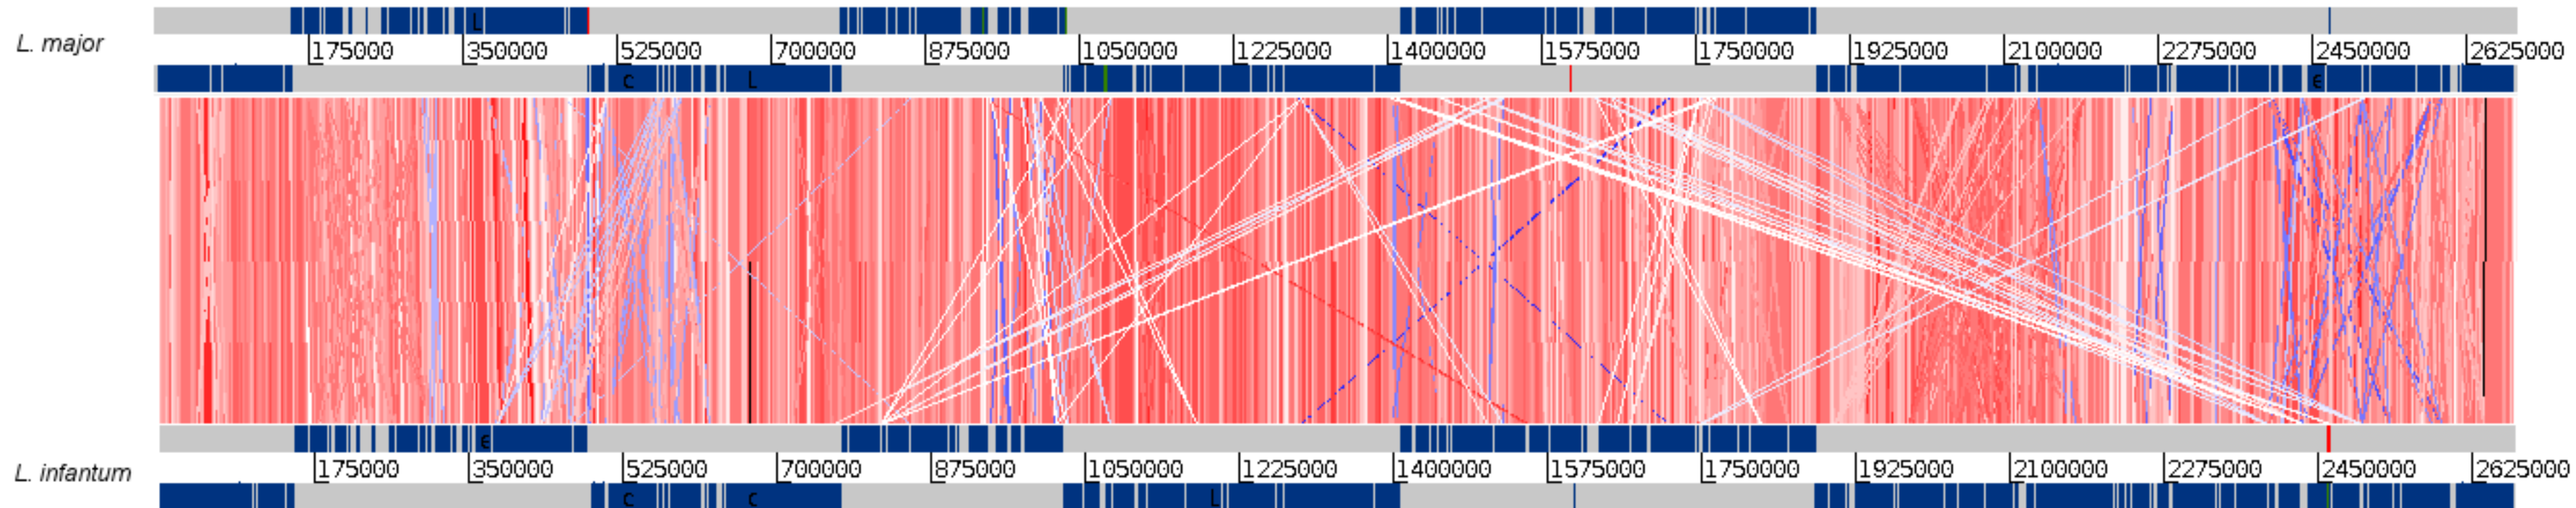

Supplement: pone.0063068.s007.pdf [file pone.0063068.s007.pdf]
