# Supplementary material for: Genomic Analysis of Sequence-Dependent DNA Curvature in Leishmania
Source: PubMed Central journal article supplement (PMC3639952; doi:10.1371/journal.pone.0063068), 2013-04-30
Supplement: pone.0063068.s001.pdf [file pone.0063068.s001.pdf]

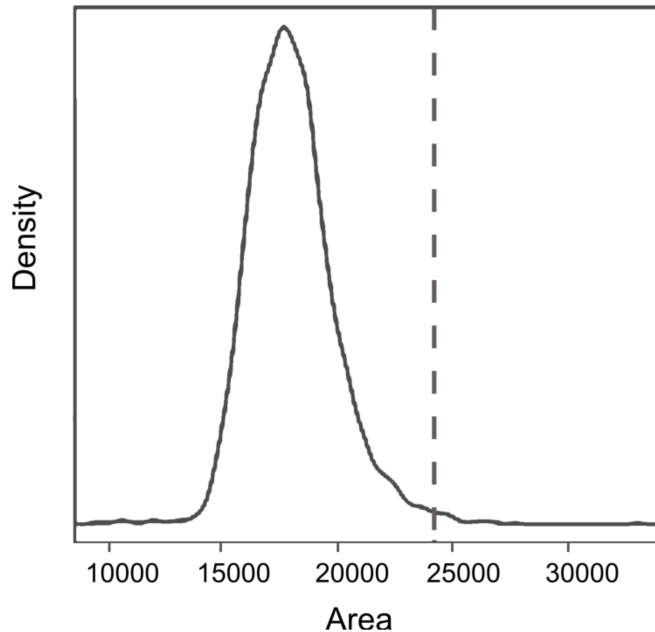

**S Figure 1. Regional Integrated Intrinsic Curvature analysis in *L. major***

The Riemann sum for the curvature plot was calculated for a SSR spanning 6176bp in *L. major* Chr22 (from 605990 to 612166) is shown as a vertical dotted line. This score is compared to the density function representing the population of RIIC scores for equal-length regions in the genome (solid line). In this case, the difference is statistically significant ( $p < 0.05$ ).
