# Supplementary material for: Genomic Analysis of Sequence-Dependent DNA Curvature in Leishmania
Source: PubMed Central journal article supplement (PMC3639952; doi:10.1371/journal.pone.0063068), 2013-04-30
Supplement: pone.0063068.s002.pdf [file pone.0063068.s002.pdf]

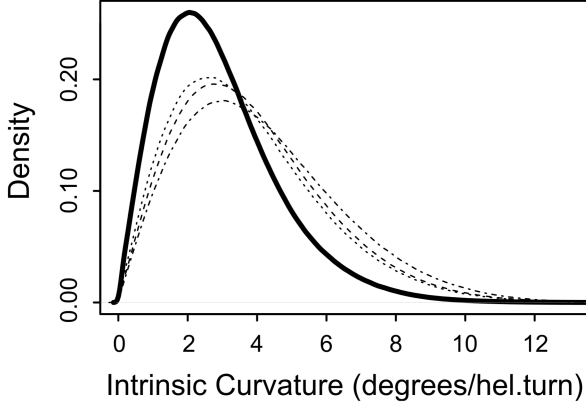

**S Figure 2. Genome wide curvature distribution for the Tritryps.**

The DNA intrinsic curvature for the Tritryps genomes *L. major* (-), *T. brucei* (- -) and *T. cruzi* (...), an external reference fragment of approx. 7Mb from human chromosome 1 spanning from 137Mb to 144Mb (.-) and *E. coli* BW2952 strain (- -), were analyzed with the bend.it algorithm, using a 31bp window and DNaseI + nucleosome positioning data parameters.
