# Supplementary material for: Genomic Analysis of Sequence-Dependent DNA Curvature in Leishmania
Source: PubMed Central journal article supplement (PMC3639952; doi:10.1371/journal.pone.0063068), 2013-04-30
Supplement: pone.0063068.s003.pdf [file pone.0063068.s003.pdf]

*L. major*

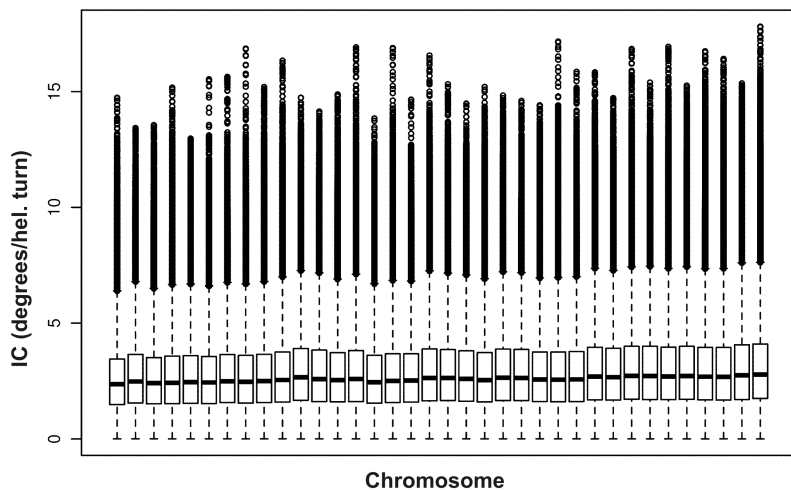

*L. infantum*

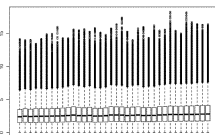

*L. braziliensis*

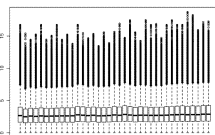

*L. mexicana*

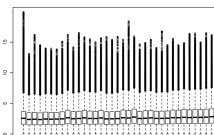

**S Figure 3. Box plots of the intrinsic curvature distribution across *Leishmania* chromosomes.**

Chromosomes are depicted in ascending order from left to right. Upper panel: *L. major* chromosomes 1 to 36. Lower panel: *L. infantum* chromosomes 0 to 36; *L. braziliensis* chromosomes 0 to 35; *L. mexicana* chromosomes 0 to 34 from *L. mexicana*. For lower panels axes are as in the upper panel.
