# Supplementary material for: Genomic Analysis of Sequence-Dependent DNA Curvature in Leishmania
Source: PubMed Central journal article supplement (PMC3639952; doi:10.1371/journal.pone.0063068), 2013-04-30
Supplement: pone.0063068.s004.pdf [file pone.0063068.s004.pdf]

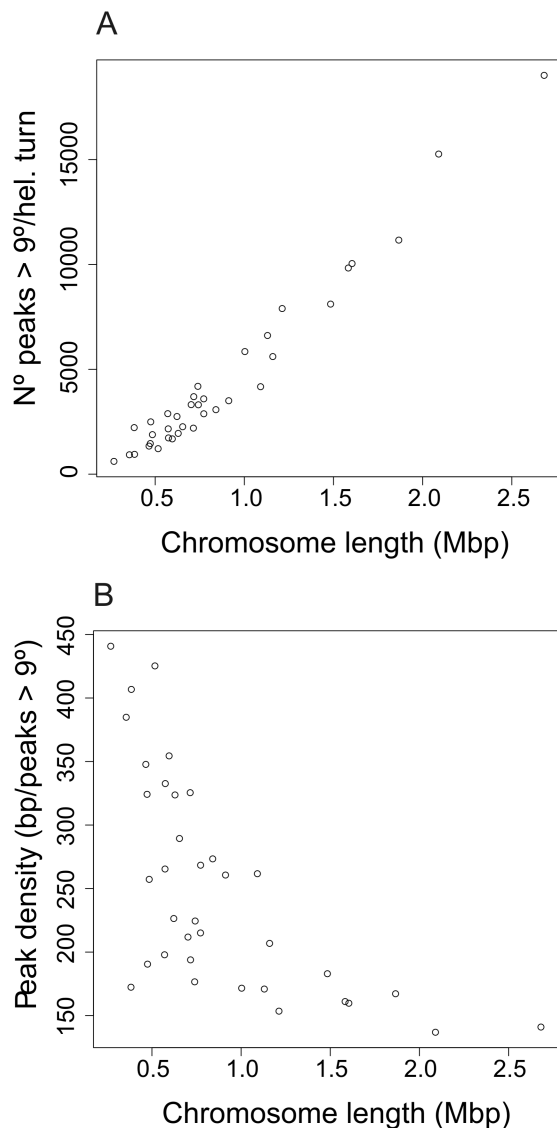

**S Figure 4. Relationship between peaks of high predicted intrinsic curvature and chromosome length.**

**A.** The number of IC peaks greater than 9 degrees per helical turn in each chromosome was plotted against the chromosome length. **B.** The average frequency of IC peaks greater than 9 degrees per helical turn (calculated as the chromosome length divided by the absolute number of peaks) is plotted against chromosome number.
