# Supplementary material for: Genomic Analysis of Sequence-Dependent DNA Curvature in Leishmania
Source: PubMed Central journal article supplement (PMC3639952; doi:10.1371/journal.pone.0063068), 2013-04-30
Supplement: pone.0063068.s008.pdf [file pone.0063068.s008.pdf]

**Supplementary Table 1. Genome intrinsic curvature**

| <b>Organism</b>        | <b>genome length (Mb)</b> | <b>G+C (%)</b> | <b>median IC (degrees/hel. turn)</b> |
|------------------------|---------------------------|----------------|--------------------------------------|
| <i>L. major</i>        | 32.9                      | 59.7           | 2.63                                 |
| <i>L. infantum</i>     |                           |                |                                      |
| <i>L. braziliensis</i> | 32.3 ± 0.4                | 59.2 ± 1.0     | 2.67 ± 0.06                          |
| <i>L. mexicana</i>     |                           |                |                                      |
| <i>T. cruzi</i>        | 32.5                      | 50.3           | 3.36                                 |
| <i>T. brucei</i>       | 26.2                      | 46.4           | 3.52                                 |
| <i>E. coli</i>         | 4.6                       | 50.8           | 3.7                                  |
| <i>H. sapiens*</i>     | 6.7                       | 40.1           | 3.8                                  |

\*The values correspond to the genome fragment analyzed (see Materials and Methods).
