# Supplementary material for: Genomic Analysis of Sequence-Dependent DNA Curvature in Leishmania
Source: PubMed Central journal article supplement (PMC3639952; doi:10.1371/journal.pone.0063068), 2013-04-30
Supplement: pone.0063068.s009.pdf [file pone.0063068.s009.pdf]

Supplementary Table 2

Chromosome intrinsic curvature in *L major*

| Number | Length (bp) | G+C (%) | Median IC | CDS (%) |
|--------|-------------|---------|-----------|---------|
| 1      | 268984      | 63,08   | 2,37      | 52,61   |
| 2      | 355714      | 62,98   | 2,48      | 51,07   |
| 3      | 384518      | 62,99   | 2,41      | 61,27   |
| 4      | 472856      | 61,74   | 2,43      | 54,99   |
| 5      | 465823      | 61,93   | 2,45      | 54,58   |
| 6      | 516874      | 62,28   | 2,44      | 56,46   |
| 7      | 596348      | 61,40   | 2,49      | 53,33   |
| 8      | 574972      | 62,22   | 2,46      | 43,72   |
| 9      | 573441      | 61,09   | 2,50      | 53,66   |
| 10     | 570864      | 59,80   | 2,55      | 46,67   |
| 11     | 582575      | 59,39   | 2,66      | 45,80   |
| 12     | 675347      | 61,61   | 2,58      | 43,72   |
| 13     | 654604      | 60,53   | 2,54      | 53,91   |
| 14     | 622648      | 59,92   | 2,59      | 48,58   |
| 15     | 629514      | 61,69   | 2,45      | 55,42   |
| 16     | 714659      | 61,03   | 2,50      | 54,32   |
| 17     | 684831      | 60,86   | 2,52      | 52,01   |
| 18     | 739751      | 58,98   | 2,63      | 43,16   |
| 19     | 702212      | 59,64   | 2,63      | 45,76   |
| 20     | 742551      | 59,89   | 2,60      | 49,96   |
| 21     | 772974      | 60,42   | 2,54      | 51,25   |
| 22     | 716608      | 59,20   | 2,64      | 48,29   |
| 23     | 772567      | 59,50   | 2,63      | 46,22   |
| 24     | 840950      | 60,41   | 2,57      | 54,09   |
| 25     | 912849      | 60,06   | 2,56      | 51,49   |
| 26     | 1091579     | 60,39   | 2,57      | 52,39   |
| 27     | 1130447     | 58,80   | 2,69      | 46,30   |
| 28     | 1160128     | 59,22   | 2,67      | 47,70   |
| 29     | 1212674     | 58,71   | 2,72      | 44,56   |
| 30     | 1403454     | 58,81   | 2,72      | 45,17   |
| 31     | 1484336     | 59,03   | 2,69      | 43,67   |
| 32     | 1604650     | 58,81   | 2,72      | 46,59   |
| 33     | 1583673     | 59,07   | 2,69      | 45,37   |
| 34     | 1866754     | 59,32   | 2,68      | 46,24   |
| 35     | 2090491     | 58,23   | 2,75      | 47,00   |
| 36     | 2682183     | 58,13   | 2,78      | 48,20   |
